# Supplementary material
Source: PubMed Central journal article supplement (PMC5576868)
Supplement: NIHMS897335-supplement-supplement_1.pdf [file NIHMS897335-supplement-supplement_1.pdf]

## Supplement Material

### Supplemental Text

#### Tissue-specific gene regulatory networks and protein-protein interaction networks

To retrieve gene-gene relations, we utilized two types of gene networks. The first type was Bayesian regulatory networks, which are directed acyclic graphs with the edges of the graph defined by conditional probabilities that characterize the distribution of states of each gene given the state of its parents (1, 2). The tissue-specific Bayesian network models adopted in our analysis were reconstructed from multiple previously published human and mouse studies (**Supplementary Table VI**), each involving genetics and gene expression data from hundreds of samples, using an established method (3, 4). Mouse Bayesian networks were obtained from adipose tissue, brain, heart, islet cells, kidney, skeletal muscle, and liver while human networks were obtained from aorta, artery, adipose, blood, cardiac muscle, smooth muscle, vascular endothelium, and liver (5-11). If there were more than one study for a given tissue, we took the union of the edges from multiple networks to derive a combined network for that tissue. In addition, we supplemented the gene regulatory networks which primarily reflect transcriptional regulation with human protein-protein interaction (PPI) network from Human protein reference database (<http://www.hprd.org/>) to capture functional relations between proteins (12). In total, we compiled 14 network models: aorta, artery, adipose tissue, blood, brain, heart, islet, kidney, skeletal muscle, cardiac muscle, smooth muscle, vascular endothelium, liver, and PPI.

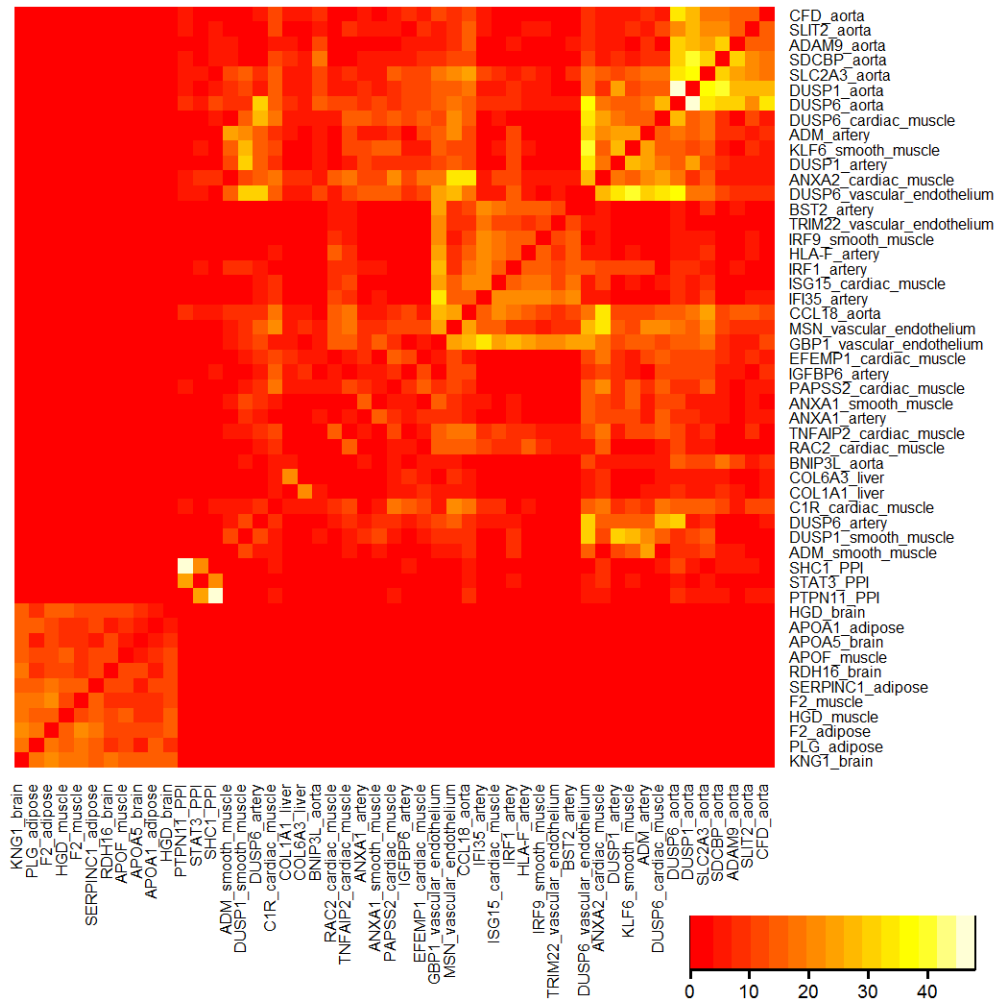

**Supplemental Figure I. The overlap architecture between KD subnetworks with >15 overlapping genes.**

**Supplemental Table I. CAD gene lists from CAD GWAS and other functional studies.**

| CAD Gene Lists  | Member Genes                                                                                                                                                                                                                                                                                                                                                                                                                                                                                                                                                                                                                                                                                                                                                                                                                                                                                                                                                                                                                                                                                                                                                                                                                           |
|-----------------|----------------------------------------------------------------------------------------------------------------------------------------------------------------------------------------------------------------------------------------------------------------------------------------------------------------------------------------------------------------------------------------------------------------------------------------------------------------------------------------------------------------------------------------------------------------------------------------------------------------------------------------------------------------------------------------------------------------------------------------------------------------------------------------------------------------------------------------------------------------------------------------------------------------------------------------------------------------------------------------------------------------------------------------------------------------------------------------------------------------------------------------------------------------------------------------------------------------------------------------|
| <b>CAD GWAS</b> | ABO; ACAD10; ADAMTS7; AGBL1; ALDH2; ALDH8A1; ANKS1A; APOA1; APOA4; APOA5; APOC3; ASIC2; ATP2B1; ATP5G1; ATXN3; BSND; BTNL2; C10orf76; C12orf43; C12orf51; C2orf85; C6orf10; CACNA1E; CACNA2D3; CALCRL; CAPS2; CCDC157; CDH13; CDH9; CDKN2A; CDKN2B; CELSR2; CNNM2; COL4A1; COL4A2; CUX2; CXCL12; CYP17A1; DNAH6; EEF1E1; EMP1; ERBB4; FBXO15; FBXO3; FHL5; FLJ43860; FLT1; FMN2; FN1; FNDC1; GIP; GRIN3A; GUCY1A3; HCG27; HECTD4; HEMGN; HFE2; HHIPL1; HLA-C; HLA-DQB1; HNF1A; HSP90B1; IFT88; IL6R; INPP5D; IPMK; KCNE2; KCNK13; KCNQ3; KIAA1462; KLF6; LARGE; LDLR; LIPA; LOC646730; LPA; LPAL2; LRP6; LYSDM4; MCART2; MIA3; MIR4499; MIR548AV; MIR548G; MORF4L1; MRAS; MRPS6; MSI2; MTAP; MTHFD1L; MUTED; MYL2; NRG1; NT5C2; NUMB; PCSK9; PDGFD; PECAM1; PEMT; PHACTR1; PLD5; PPAP2B; PRICKLE2; PRICKLE2-AS3; PRKCA; PSRC1; RAI1; RASD1; RGS2; RIT2; SEMA6D; SF3A1; SH2B3; SLC1A1; SLC22A3; SLC2A13; SLC5A3; SMAD3; SMARCA4; SMC3; SMG6; SNF8; SORCS2; SORT1; SOX9; SPATA7; SRR; ST3GAL4; ST8SIA1; STEAP1; STK32B; SUCLG1; TCF21; TFPI; TTC32; UBE2Z; VEGFA; WDR12; WDR33; WDR35; WDR86-AS1; ZC3HC1; ZFPM2; ZNF259; ZNF383                                                                                                          |
| <b>CAD C4D</b>  | ABCG5; ABCG8; ABO; ACAD10; ACSS2; ADAMTS7; AGBL1; AKAP13; ALDH2; ALDH8A1; ALS2CR16; ANKS1A; ANXA11; APOA1; APOA4; APOA5; APOB; APOC1; APOC2; APOC3; APOC4; APOE; ARHGAP26; ARVCF; ASIC2; ATP2B1; ATP5G1; ATP5SL; ATPAF2; ATXN2; ATXN3; BMP1; BMPR1A; BNC2; BSND; BTNL2; C10orf76; C12orf43; C12orf51; C2orf85; C6orf10; CA10; CACNA1E; CACNA2D3; CALCRL; CAMSAP1L1; CAPS2; CCDC157; CDH13; CDH9; CDKN2A; CDKN2B; CDKN2B-AS1; CELSR2; CKM; CNNM2; COG5; COL4A1; COL4A2; COL4A4; CTAGE1; CUX2; CXCL12; CYP17A1; CYP46A1; DCPS; DDX59; DNAH6; DYNC2L11; EDNRA; EEF1E1; EMP1; ERBB4; FBXO15; FBXO3; FES; FHL5; FLJ43860; FLT1; FMN2; FN1; FNDC1; FURIN; GGCX; GIP; GNPDA2; GRIN3A; GUCY1A3; HCG27; HDAC9; HECTD4; HEMGN; HFE2; HHIPL1; HIP1; HLA-C; HLA-DQB1; HNF1A; HSD17B12; HSP90B1; IFT88; IL6R; INPP5D; IPMK; JAZF1; KCNE2; KCNK13; KCNK5; KCNQ3; KIAA1462; KLF6; LARGE; LDLR; LIPA; LMOD1; LOC646730; LPA; LPAL2; LPL; LRP6; LRRC2; LRRC48; LY86; LYSDM4; MAP3K4; MAP4; MAP9; MARK4; MCART2; MCL1; MIA3; MIR4499; MIR548AV; MIR548G; MORF4L1; MRAS; MRG15; MRPS6; MSI2; MTAP; MTHFD1L; MUTED; MYBPHL; MYL2; NGF; NME7; NRG1; NT5C2; NUMB; OBF1; OSM; PARP12; PCNXL3; PCSK9; PDE3A; PDGFD; PDGFRA; PECAM1; PEMT; PHACTR1; PKN2; PLD5; |

|                          |                                                                                                                                                                                                                                                                                                                                                                                                                                                                                                                                                                                                                                                                                                                                                                                                                                                                                                                                                                                                                                                                                                                                                                                                                                                                                                                                                                                                                                                                                                                                                                                                                                                                                                                                                                                                                                                                                                                                                                                                                                                                                                                                                                                                                                                                                                                                                                                                                                                                                                                                                                                                                                                                                                                                                                                                                                                                                                                                                                                                                                                                                                                                                                                                                                                                                                                                                                                                                                                                                                                                                                                                                                                                                                                                                                                                                                                                                                                                                                                                                                                                                                                                                                                                                                                                                                                                                                                                                                                                                                                                                                                                                                                                                                   |
|--------------------------|---------------------------------------------------------------------------------------------------------------------------------------------------------------------------------------------------------------------------------------------------------------------------------------------------------------------------------------------------------------------------------------------------------------------------------------------------------------------------------------------------------------------------------------------------------------------------------------------------------------------------------------------------------------------------------------------------------------------------------------------------------------------------------------------------------------------------------------------------------------------------------------------------------------------------------------------------------------------------------------------------------------------------------------------------------------------------------------------------------------------------------------------------------------------------------------------------------------------------------------------------------------------------------------------------------------------------------------------------------------------------------------------------------------------------------------------------------------------------------------------------------------------------------------------------------------------------------------------------------------------------------------------------------------------------------------------------------------------------------------------------------------------------------------------------------------------------------------------------------------------------------------------------------------------------------------------------------------------------------------------------------------------------------------------------------------------------------------------------------------------------------------------------------------------------------------------------------------------------------------------------------------------------------------------------------------------------------------------------------------------------------------------------------------------------------------------------------------------------------------------------------------------------------------------------------------------------------------------------------------------------------------------------------------------------------------------------------------------------------------------------------------------------------------------------------------------------------------------------------------------------------------------------------------------------------------------------------------------------------------------------------------------------------------------------------------------------------------------------------------------------------------------------------------------------------------------------------------------------------------------------------------------------------------------------------------------------------------------------------------------------------------------------------------------------------------------------------------------------------------------------------------------------------------------------------------------------------------------------------------------------------------------------------------------------------------------------------------------------------------------------------------------------------------------------------------------------------------------------------------------------------------------------------------------------------------------------------------------------------------------------------------------------------------------------------------------------------------------------------------------------------------------------------------------------------------------------------------------------------------------------------------------------------------------------------------------------------------------------------------------------------------------------------------------------------------------------------------------------------------------------------------------------------------------------------------------------------------------------------------------------------------------------------------------------------------------------|
|                          | <p>PLEKHG1; PLG; PODXL; PPAP2B; PPP2R3A; PRICKLE2; PRICKLE2-AS3; PRKCA; PROCR; PSRC1; RAI1; RASD1; RBPMS2; RGS2; RIT2; RND3; RPEL; RPH3A; SARS; SCARB1; SEMA6D; SERPINH1; SF3A1; SH2B3; SKI; SLC1A1; SLC22A3; SLC22A4; SLC22A5; SLC2A13; SLC5A3; SLC01B1; SMAD3; SMARCA4; SMCR3; SMG6; SNF8; SNX10; SORCS2; SORT1; SOX9; SPATA7; SPC24; SRR; ST3GAL4; ST8SIA1; STEAP1; STK32B; SUCLG1; SWAP70; TCF21; TERT; TFPI; TMEM161B; TNS1; TOM1L2; TOMM40; TRAFD1; TRIB1; TSC22D2; TTC32; UBE2Z; UBTF; USP53; VAMP8; VEGFA; WDR12; WDR33; WDR35; WDR86-AS1; ZC3HC1; ZEB2; ZFPM2; ZNF259; ZNF383; ZNF652</p>                                                                                                                                                                                                                                                                                                                                                                                                                                                                                                                                                                                                                                                                                                                                                                                                                                                                                                                                                                                                                                                                                                                                                                                                                                                                                                                                                                                                                                                                                                                                                                                                                                                                                                                                                                                                                                                                                                                                                                                                                                                                                                                                                                                                                                                                                                                                                                                                                                                                                                                                                                                                                                                                                                                                                                                                                                                                                                                                                                                                                                                                                                                                                                                                                                                                                                                                                                                                                                                                                                                                                                                                                                                                                                                                                                                                                                                                                                                                                                                                                                                                                                |
| <b>CAD C4D no Lipid</b>  | <p>ACAD10; ACSS2; ADAMTS7; AKAP13; ANKS1A; ANXA11; ARHGAP26; ARVCF; ATP2B1; ATP5G1; ATP5SL; ATPAF2; ATXN2; BMPR1A; BNC2; BTNL2; C12ORF43; C3ORF38; C6ORF10; CA10; CAMSAP1L1; CDKN1A; CDKN2A; CDKN2B; CKM; CNNM2; COG5; COL4A1; COL4A2; COL4A4; CTAGE1; CUX2; CXCL12; CYP17A1; CYP46A1; DCPS; DDX59; DQ582071; DYNC2L1; EDNRA; FES; FHL5; FLT1; FNDC1; FURIN; GGCX; GIP; GNPDA2; GUCY1A3; HCG27; HDAC9; HECTD4; HFE2; HHIPL1; HIP1; HSD17B12; HSP90B1; IGSF5; IL6R; JAZF1; KCNE2; KCNK5; KIAA1462; KLHL29; LIPA; LMOD1; LPAL2; LRRC2; LRRC48; LY86; MAP3K4; MAP4; MAP9; MARK4; MCL1; MFSD2B; MIA3; MORF4L1; MRAS; MRPS6; MTAP; MTHFD1L; MYBPHL; NGF; NME7; NT5C2; NUGGC; OBFC1; OPRM1; OSM; PARP12; PCNXL3; PDGFRA; PECAM1; PENT; PHACTR1; PKN2; PLEKHG1; PLG; PODXL; PPAP2B; PPP2R3A; PROCR; PTPN11; RAI1; RASD1; RBPMS2; RND3; RPH3A; RPL6; SARS; SERPINH1; SH2B3; SKI; SLC12A9; SLC22A3; SLC22A4; SLC22A5; SLC30A1; SLC5A3; SLC01B1; SMAD3; SMCR3; SMG6; SNF8; SNX10; SRR; STK32B; SWAP70; TCF21; TCF7L2; TERT; TEX41; TMEM161B; TNS1; TOM1L2; TRAFD1; TSC22D2; TTC32; UBE2Z; UBTF; USP53; VAMP5; VAMP8; WDR12; WDR35; ZC3HC1; ZEB2; ZNF652</p>                                                                                                                                                                                                                                                                                                                                                                                                                                                                                                                                                                                                                                                                                                                                                                                                                                                                                                                                                                                                                                                                                                                                                                                                                                                                                                                                                                                                                                                                                                                                                                                                                                                                                                                                                                                                                                                                                                                                                                                                                                                                                                                                                                                                                                                                                                                                                                                                                                                                                                                                                                                                                                                                                                                                                                                                                                                                                                                                                                                                                                                                                                                                                                                                                                                                                                                                                                                                                                                                                                                                                 |
| <b>CAD GWAS no lipid</b> | <p>ACAD10; ADAMTS7; AGBL1; ALDH8A1; ANKS1A; ASIC2; ATP2B1; ATP5G1; ATXN3; BSND; BTNL2; C10orf76; C12orf43; C2orf85; C6orf10; CACNA1E; CACNA2D3; CALCRL; CAPS2; CCDC157; CDH13; CDH9; CDKN2A; CDKN2B; CNNM2; COL4A1; COL4A2; CUX2; CXCL12; CYP17A1; DNAH6; EEF1E1; EMP1; ERBB4; FBXO15; FBXO3; FHL5; FLJ43860; FLT1; FMN2; FNDC1; GIP; GRIN3A; GUCY1A3; HCG27; HECTD4; HEMGN; HFE2; HHIPL1; HLA-C; HLA-DQB1; HSP90B1; IFT88; IL6R; INPP5D; IPMK; KCNE2; KCNK13; KCNQ3; KIAA1462; KLF6; LARGE; LIPA; LOC646730; LPAL2; LRP6; LYSMD4; MCART2; MIA3; MIR4499; MIR548AV; MIR548G; MORF4L1; MRAS; MRPS6; MSI2; MTAP; MTHFD1L; MUTED; NRG1; NT5C2; NUMB; PECAM1; PENT; PHACTR1; PLD5; PPAP2B; PRICKLE2; PRICKLE2-AS3; PRKCA; RAI1; RASD1; RGS2; RIT2; SEMA6D; SF3A1; SH2B3; SLC1A1; SLC22A3; SLC2A13; SLC5A3; SMAD3; SMCR3; SMG6; SNF8; SORCS2; SOX9; SPATA7; SRR; ST8SIA1; ST8SIA1; STK32B; SUCLG1; TCF21; TFPI; TTC32; UBE2Z; WDR12; WDR33; WDR35; WDR86-AS1; ZC3HC1; ZFPM2; ZNF383</p>                                                                                                                                                                                                                                                                                                                                                                                                                                                                                                                                                                                                                                                                                                                                                                                                                                                                                                                                                                                                                                                                                                                                                                                                                                                                                                                                                                                                                                                                                                                                                                                                                                                                                                                                                                                                                                                                                                                                                                                                                                                                                                                                                                                                                                                                                                                                                                                                                                                                                                                                                                                                                                                                                                                                                                                                                                                                                                                                                                                                                                                                                                                                                                                                                                                                                                                                                                                                                                                                                                                                                                                                                                                                                                                |
| <b>CAD Extend</b>        | <p>ABCG5; ABCG8; ABO; AC026250.16; AC087164.1; ACAD10; ACSS2; ACTA2; ACTR1A; ADAMTS7; ADM; AF075116; AF085859; AF124731.2; AGBL1; AIDA; AK023781; AK023818; AK054569; AK095583; AK098707; AKAP13; AL049919; AL049980; AL591069.5; ALDH2; ALDH8A1; ALS2CR13; ALS2CR16; ALS2CR8; ANKRD1A; ANKRD10; ANKRD25; ANKS1A; ANXA11; APOA1; APOA4; APOA5; APOB; APOC1; APOC2; APOC3; APOC4; APOE; ARHGAP26; ARL3; ARVCF; ASB16; ASIC2; ATP1B1; ATP2B1; ATP5G1; ATP5SL; ATP8B2; ATPAF2; ATRIP; ATXN2; ATXN3; B3GNT8; BCKDHA; BLZF1; BMP1; BMPR1A; BNC2; BRAP; BSND; BTNL2; C10orf26; C10orf32; C10orf57; C10orf58; C10orf76; C12ORF24; C12orf30; C12orf43; C12orf47; C12orf51; C17orf39; C17orf53; C17orf65; C19orf52; C1orf58; C1ORF6; C21ORF7; C22ORF25; C2ORF44; C2orf84; C2orf85; C3orf38; C3ORF75; C6orf10; C6ORF64; CA10; CACNA1E; CACNA2D3; CACNG5; CALCOCO2; CALCRL; CAMP; CAMSAP1L1; CAPS2; CCBL2; CCDC157; CCDC181; CCDC85C; CCL25; CCT8; CD82; CDC25A; CDH13; CDH9; CDKN1A; CDKN2A; CDKN2B; CDKN2B-AS1; CEACAM1; CECR6; CELSR2; CEP70; CHRNA5; CKM; CLEC10A; CMTM2; CNNM2; COG5; COG6; COL4A1; COL4A2; COL4A4; COMT; Contig21679_RC; Contig46411_RC; CPNE1; CSNK1G1; CSPG5; CTAGE1; CTSH; CTSX; CTSS; CUX2; CXCL12; CYP17A1; CYP46A1; DCPS; DDX59; DEF6; DGCR8; DHX30; DKFZp434K191; DKFZP564C152; DKFZP761E198; DLX4; DNAH6; DOCK5; DPEP3; DRG2; DYNC2L11; DYNLRB1; EDEM2; EDNRA; EEF1E1; EIF2A; EIF6; EML1; EMP1; ENSG00000047849.17; ENSG00000107798.11; ENSG00000111252.5; ENSG00000115486.6; ENSG00000135213.8; ENSG00000136378.8; ENSG00000138380.11; ENSG00000140395.3; ENSG00000154305.11; ENSG00000159202.11; ENSG00000160679.8; ENSG00000182511.7; ENST00000238803; ENST00000296496; ENST00000300223; ERBB4; ERCC2; ERGIC3; ERP29; EXOSC5; FAM117B; FAM118B; FAM177B; FAM46A; FARS2; FBF1; FBXO15; FBXO3; FBXO46; FBXW5; FES; FHL5; FIP1L1; FLCN; FLJ12334; FLJ21127; FLJ30092; FLJ39616; FLJ42875; FLJ43860; FLT1; FMN2; FN1; FNDC1; FOS; FOXRED1; FURIN; G6PC3; GALNT4; GATA2; GBP1; GBP2; GBP4; GBP5; GCDH; GDPD5; GGCX; GGT7; GGTL3; GIP; GJC1; GNAI3; GNGT2; GNLY; GNPDA2; GPN3; GPR22; GRAP2; GRIN3A; GSTM4; GTF2B; GUCY1A3; HBP1; HCG27; hCT1652322.2; HDAC9; HDC; HECTD4; HEMGN; HFE2; HHIPL1; HIP1; HIST1H2BD; HIVEP1; HLA-C; HLA-DQB1; HNF1A; HORMAD1; HS.443185; HS.494277; HS.539450; hsa-miR-185; HSD17B12; HSP90B1; HSS00142168; ICA1L; IDS; IFIT3; IFIT5; IFT88; IL6R; IL8; INPP5D; INTS10; IPMK; IPO9; IREB2; IRS2; ITCH; ITGA3; ITGB4BP; JAZF1; KANK2; KAT3; KCNE2; KCNJ5; KCNK13; KCNK5; KCNQ3; KIAA1143; KIAA1324; KIAA1462; KIF14; KLC3; KLF6; KLHDC10; KLHL35; LAMP2; LARGE; LDLR; LIMD1; LIPA; LMOD1; LOC100129828; LOC100131662; LOC1283033; LOC338862; LOC340322; LOC401152; LOC402176; LOC407835; LOC646730; LOC653764; LOC729580; LPA; LPAL2; LPL; LRP6; LRRC2; LRRC48; LTF; LY86; LYSMD4; MAN2A2; MAP3K4; MAP4; MAP9; MAPKAPK5; MAPRE3; MARCKSL1; MARK4; MAT1A; MAT2A; MCART2; MCL1; MEF2C; MIA3; MIR1297; MIR4499; MIR4693; MIR548AV; MIR548G; MMP24; MORF4L1; MRAS; MRG15; MRPS6; MSI2; MSL2; MSL2L1; MT1P3; MTAP; MTHFD1L; MTP18; MUTED; MYADM; MYBPHL; MYH7B; MYL2; MYO15A; NA; NALP12; NBEAL1; NCLN; NCRNA00173; NFE2L3; NGF; NME6; NME7; NRG1; NT5C2; NUDT18; NUGGC; NUMB; OAS1; OASL; OAZ2; OBFC1; OPLAH; OSM; OVOL1; P4HA2; PARP12; PCCB; PCNXL3; PCSK7; PCSK9; PDE3A; PDGFR; PDGFRA; PECAM1; PENT; PFN4; PHACTR1; PHB; PHOSPHO1; PIK3CG; PKN2; PLD5; PLEKHG1; PLEKH2; PLG; PMS2L3; PMS2P3; PODXL; POLG2; PPAP2B; PPP1R15A; PPP2R3A; PRICKLE2; PRICKLE2-AS3; PRKAB2; PRKCA; PROCR; PSME3; PSRC1; PTPN23; PVRL2; RAI1; RALY; RANBP9; RAPH1; RASD1; RBL1; RBPMS2; RELA; REST; RGS2; RHBDD1; RIT2; RND3; ROMO1; RP11-541N10.2; RPEL; RPH3A; RUND3A; S100A10; SARS; SCARB1; SEC24D; SEMA6D; SERPINH1; SF3A1; SFTPC; SFXN2; SH2B3; SH3PXD2A; SHE; SHISA4; SIDT2; SIPA1; SKAP1; SKI; SLC1A1; SLC22A3; SLC22A4; SLC22A5; SLC25A39; SLC2A13; SLC4A1; SLC5A3; SLC01B1; SLIT3; SMAD3; SMARCA4; SMARCC1; SMCR3; SMG6; SNF8; SNX1; SNX10; SORCS2; SORT1; SOX9; SPAG9; SPATA7; SPC24; SPC25; SPG21; SREBF1; SRPK1; SRPR; SRR; SSU72; ST3GAL4; ST8SIA1; STAG3L3; STAT1; STEAP1; STK32B; STMN3; SUCLG1; SURF1; SURF6; SWAP70; SYP; T40707; TAF1A; TAGAP; TAGLN; TBXAS1; TCF21; TCF11; TCTN1; TERT; TEX2; TFPI; TGM3; TIRAP; TMEM101; TMEM116; TMEM161B; TMEM180; TMEM91; TMUB2; TNS1; TOM1L2; TOMM40; TP53I3; TRAFD1; TRIB1; TRIM73; TRIP4; TRPC4AP; TSC22D2; TSPAN14; TSR1; TTC32; UBAP2L; UBE2L6; UBE2Z; UBTF; UBXD4; UBXN2A; UNC45A; UNQ9391; UPP1; UQCC; USMG5; USP39; USP53; UVRAG; VAMP5; VAMP8; VASP; VEGFA; VPS33B; WBSCR16; WDR12; WDR33; WDR35; WDR51B; WDR86-AS1; XRR1; YY1; Z85996.1-1; ZC3HC1; ZEB2; ZFPM2; ZFYVE20; ZNF259; ZNF383; ZNF589; ZNF652</p> |
| <b>CAD 1000G</b>         | <p>ABCG5; ABCG8; ABHD2; ABO; ACAD10; ACO74093.1; ACSS2; ADAMTS7; ADORA2A; ADTRP; AGBL1; AKO97927; AKAP13; ALDH2; ALDH8A1; ALS2CR16; ANKS1A; ANXA11; APOA1; APOA4; APOA5; APOB; APOC1; APOC2; APOC3; APOC4; APOE; ARHGAP26; ARVCF; ASIC2; ATP2B1; ATP5G1; ATP5SL; ATPAF2; ATXN2; ATXN3; BCAS3; BMP1; BMPR1A; BNC2; BSND; BTNL2; C10orf76; C12orf43; C12orf51; C2orf85; C6orf10; C6orf105; CA10; CACNA1E; CACNA2D3; CALCRL; CAMSAP1L1; CAPS2; CCDC157; CDH13; CDH9; CDKN1A; CDKN2A; CDKN2B; CDKN2B-AS1; CELSR2; CKM; CNNM2; COG5; COL4A1; COL4A2; COL4A4; CTAGE1; CUX2; CXCL12; CYP17A1; CYP46A1; DCPS; DDX59; DNAH6; DYNC2L1; EDNRA; EEF1E1; EMP1; ERBB4; FBXO15; FBXO3; FES; FHL5; FLJ43860; FLT1; FMN2; FN1; FNDC1; FURIN; GGCX; GIP; GNPDA2; GRIN3A; GUCY1A3; HCG27; HDAC9; HECTD4; HEMGN; HFE2; HHIPL1; HIP1; HLA-C; HLA-DQB1; HNF1A; HSD17B12; HSP90B1; IFT88; IL6R; INPP5D; IPMK; JAZF1; KCNE2; KCNK13; KCNK5; KCNQ3; KIAA1462; KLF6; KSR2; LARGE; LDLR; LIPA; LMOD1; LOC400684; LOC646730; LPA; LPAL2; LPL; LRP6; LRRC2; LRRC48; LY86; LYSMD4; MAP3K4; MAP4; MAP9; MARK4; MCART2; MCL1; MFGE8; MIA3; MIR4499; MIR548AV; MIR548G; MORF4L1;</p>                                                                                                                                                                                                                                                                                                                                                                                                                                                                                                                                                                                                                                                                                                                                                                                                                                                                                                                                                                                                                                                                                                                                                                                                                                                                                                                                                                                                                                                                                                                                                                                                                                                                                                                                                                                                                                                                                                                                                                                                                                                                                                                                                                                                                                                                                                                                                                                                                                                                                                                                                                                                                                                                                                                                                                                                                                                                                                                                                                                                                                                                                                                                                                                                                                                                                                                                                                                                                                                                                                                                               |

|                                        |                                                                                                                                                                                                                                                                                                                                                                                                                                                                                                                                                                                                                                                                                                                                                                                                                                                                                                                                                                                                                                                                                                                                                                                                                                                                                                                                                                                                                                                                                                                                                                                                                                                                                                                                                                                                                                                                                                                                                                                                                                                                                                                                                                                                                                                                                                                                                                                                                                                                                                                                                                                                                                                                                                                                                                                                                                                                                                                                                                                                                                                                                                                                                                                                                                                                                                                                                                                                                                                                                                                                                                                                                                                                                                                                                                                                                                                                                                                                                                                                                                                                                                                                                                                                                                                                                                                                                                                                                                                                                                                                                                                                                                                                                                                                                                                                                                                                                                                                                                                                                                                                                                                                                                                                                                                                                                                                                                                                                                                                                                                                                                                                                                                                                                                                                                                                                                                                                                                                                                                                                                                                                                                                                                                                                                                                                                                                                                                                                                                                                                                                                                                                                                                                                                                                                                                                                                                                                                                                                                                                                                                                                                                                                                                                                                                                                                                                                                                                                               |
|----------------------------------------|-------------------------------------------------------------------------------------------------------------------------------------------------------------------------------------------------------------------------------------------------------------------------------------------------------------------------------------------------------------------------------------------------------------------------------------------------------------------------------------------------------------------------------------------------------------------------------------------------------------------------------------------------------------------------------------------------------------------------------------------------------------------------------------------------------------------------------------------------------------------------------------------------------------------------------------------------------------------------------------------------------------------------------------------------------------------------------------------------------------------------------------------------------------------------------------------------------------------------------------------------------------------------------------------------------------------------------------------------------------------------------------------------------------------------------------------------------------------------------------------------------------------------------------------------------------------------------------------------------------------------------------------------------------------------------------------------------------------------------------------------------------------------------------------------------------------------------------------------------------------------------------------------------------------------------------------------------------------------------------------------------------------------------------------------------------------------------------------------------------------------------------------------------------------------------------------------------------------------------------------------------------------------------------------------------------------------------------------------------------------------------------------------------------------------------------------------------------------------------------------------------------------------------------------------------------------------------------------------------------------------------------------------------------------------------------------------------------------------------------------------------------------------------------------------------------------------------------------------------------------------------------------------------------------------------------------------------------------------------------------------------------------------------------------------------------------------------------------------------------------------------------------------------------------------------------------------------------------------------------------------------------------------------------------------------------------------------------------------------------------------------------------------------------------------------------------------------------------------------------------------------------------------------------------------------------------------------------------------------------------------------------------------------------------------------------------------------------------------------------------------------------------------------------------------------------------------------------------------------------------------------------------------------------------------------------------------------------------------------------------------------------------------------------------------------------------------------------------------------------------------------------------------------------------------------------------------------------------------------------------------------------------------------------------------------------------------------------------------------------------------------------------------------------------------------------------------------------------------------------------------------------------------------------------------------------------------------------------------------------------------------------------------------------------------------------------------------------------------------------------------------------------------------------------------------------------------------------------------------------------------------------------------------------------------------------------------------------------------------------------------------------------------------------------------------------------------------------------------------------------------------------------------------------------------------------------------------------------------------------------------------------------------------------------------------------------------------------------------------------------------------------------------------------------------------------------------------------------------------------------------------------------------------------------------------------------------------------------------------------------------------------------------------------------------------------------------------------------------------------------------------------------------------------------------------------------------------------------------------------------------------------------------------------------------------------------------------------------------------------------------------------------------------------------------------------------------------------------------------------------------------------------------------------------------------------------------------------------------------------------------------------------------------------------------------------------------------------------------------------------------------------------------------------------------------------------------------------------------------------------------------------------------------------------------------------------------------------------------------------------------------------------------------------------------------------------------------------------------------------------------------------------------------------------------------------------------------------------------------------------------------------------------------------------------------------------------------------------------------------------------------------------------------------------------------------------------------------------------------------------------------------------------------------------------------------------------------------------------------------------------------------------------------------------------------------------------------------------------------------------------------------------------------------------------------|
|                                        | <p>MRAS; MRG15; MRPS6; MSI2; MTAP; MTHFD1L; MUTED; MYBPHL; MYL2; NGF; NME7; NOA1; NOS3; NRG1; NT5C2; NUMB; OBFC1; OSM; PARP12; PCNXL3; PCSK9; PDE3A; PDGFD; PDGFRA; PECAM1; PEMT; PHACTR1; PKN2; PLD5; PLEKHG1; PLG; PMAIP1; PODXL; POM121L9P; PPAP2B; PPP2R3A; PRICKLE2; PRICKLE2-AS3; PRKCA; PROCR; PSRC1; RAI1; RASD1; RBPMS2; REST; RGS2; RIT2; RND3; RPEL; RPH3A; SARS; SCARB1; SEMA6D; SERPINH1; SF3A1; SF3B3; SKI; SLC1A1; SLC22A3; SLC22A4; SLC22A5; SLC2A13; SLC5A3; SLC01B1; SMAD3; SMARCA4; SMCR3; SMG6; SNF8; SNX10; SORCS2; SORT1; SOX9; SPATA7; SPC24; SRR; ST3GAL4; ST8SIA1; STEAP1; STK32B; SUCLG1; SWAP70; TCF21; TERT; TFPI; TMEM161B; TNS1; TOM1L2; TOMM40; TRAFD1; TRIB1; TSC22D2; TTC32; UBE2Z; UBTF; USP53; VAMP5; VAMP8; VEGFA; WDR12; WDR33; WDR35; WDR86-AS1; ZC3HC1; ZEB2; ZFPM2; ZNF259; ZNF383; ZNF507; ZNF652</p>                                                                                                                                                                                                                                                                                                                                                                                                                                                                                                                                                                                                                                                                                                                                                                                                                                                                                                                                                                                                                                                                                                                                                                                                                                                                                                                                                                                                                                                                                                                                                                                                                                                                                                                                                                                                                                                                                                                                                                                                                                                                                                                                                                                                                                                                                                                                                                                                                                                                                                                                                                                                                                                                                                                                                                                                                                                                                                                                                                                                                                                                                                                                                                                                                                                                                                                                                                                                                                                                                                                                                                                                                                                                                                                                                                                                                                                                                                                                                                                                                                                                                                                                                                                                                                                                                                                                                                                                                                                                                                                                                                                                                                                                                                                                                                                                                                                                                                                                                                                                                                                                                                                                                                                                                                                                                                                                                                                                                                                                                                                                                                                                                                                                                                                                                                                                                                                                                                                                                                                                                                                                                                                                                                                                                                                                                                                                                                                                                                                                                                                                                                                |
| <p><b>CAD<br/>1000G<br/>Extend</b></p> | <p>A4GNT; ABCB8; ABCG5; ABCG8; ABO; AC026250.16; AC087164.1; ACAD10; ACOX1; ACSS2; ACTA2; ACTR1A; ADAM1A; ADAMTS7; ADAMTSL4; ADM; ADTRP; AF001540; AF075116; AF085859; AF124731.2; AF147302; AGAP3; AGBL1; AIDA; AJ276246; AK023781; AK023818; AK025221; AK054569; AK054837; AK055254; AK095583; AK095904; AK097622; AK098707; AK124806; AK296065; AKAP11; AKAP13; AL049353; AL049919; AL049980; AL512662.8-2; AL591069.5; AL713721; ALDH2; ALDH8A1; ALS2CR13; ALS2CR16; ALS2CR8; ANKDD1A; ANKRD10; ANKRD25; ANKRD52; ANKS1A; ANXA11; APOA1; APOA4; APOA5; APOB; APOC1; APOC1P1; APOC2; APOC3; APOC4; APOC4-APOC2; APOE; AQP10; ARHGAP26; ARHGEF26; ARHGEF26-AS1; ARL3; ARNT; ARNTL; ARVCF; AS3MT; ASB16; ASB16-AS1; ASIC2; ASIC3; ATG9B; ATIC; ATP1B1; ATP2B1; ATP5G1; ATP5SL; ATP8B2; ATPAF2; ATRIP; ATXN2; ATXN3; ATXN7L2; ATXN7L3; AX747860; B3GALT7; B3GNT8; B4GALT5; B9D2; BC038201; BC040833; BC040861; BC041459; BC042070; BC128410; BC150162; BCAP29; BCKDHA; BLM; BLZF1; BMP1; BMPR1A; BNC2; BRAP; BSND; BTNL2; BUD13; C10orf26; C10orf32; C10orf57; C10orf58; C10orf76; C12ORF24; C12orf30; C12orf43; C12orf47; C12orf51; C16orf52; C17orf39; C17orf53; C17orf65; C19orf52; C19orf69; C19orf80; C1orf138; C1orf58; C1orf80; C1ORF86; C21orf7; C22ORF25; C2CD4D; C2orf44; C2orf68; C2orf84; C2orf85; C3orf38; C3ORF75; C4orf3; C6orf10; C6orf106; C6orf64; C6orf72; C9orf96; CA10; CACNA1E; CACNA2D3; CACNG5; CALCOCO2; CALCRL; CAMP; CAMSAP1L1; CAMSAP2; CAPS2; CARF; CARM1; CAR2; CBL2; CCDC157; CCDC181; CCDC19; CCDC85C; CCL25; CCT8; CD82; CDC25A; CDH13; CDH9; CDK5; CDKN1A; CDKN2A; CDKN2B; CDKN2B-AS1; CDKN2B_AS; CEACAM1; CECR6; CELSR2; CEP250; CEP70; CGGBP1; CH25H; CHRNA5; CHRNB4; CKM; CKS1B; CLASRP; CLEC10A; CLPTM1; CMTM2; CNM2; CNPY2; COG5; COG6; COL4A1; COL4A2; COL4A2-AS1; COL4A4; COMT; Contig21679_RC; Contig2512_RC; Contig30461_RC; Contig37346; Contig46411_RC; Contig53460_RC; COQ10A; CPNE1; CRT3; CS; CSNK1G1; CSPG5; CTAGE1; CTSB; CTSK; CTSS; CUX2; CXCL12; CYP17A1; CYP17A1-AS1; CYP26B1; CYP46A1; CYP4F11; CYP4F2; DAB2IP; DCPS; DCST1; DCST2; DDX59; DEF6; DENND5A; DGCR8; DHX30; DHX36; DKFZp434K191; DKFZP564C152; DKFZP761E198; DL490821; DLX4; DNAH6; DOCK5; DOCK6; DPEP3; DPPE2; DPH1; DPYSL2; DQ601906; DRG2; DSTN; DYDC2; DYNC2L1; DYNLRB1; EDEM2; EDNRA; EIF1E1; EIF2A; EIF6; EML1; EMP1; ENSA; ENSG00000047849.17; ENSG00000107798.11; ENSG00000111252.5; ENSG00000115486.6; ENSG00000135213.8; ENSG00000136378.8; ENSG00000138380.11; ENSG00000140395.3; ENSG00000154305.11; ENSG00000159202.11; ENSG00000160679.8; ENSG00000182511.7; ENST00000238803; ENST00000296496; ENST00000300223; ERBB4; ERCC2; ERGIC3; ERP29; ESYT3; EXOSC5; FBP2; FAIM; FAM100B; FAM102B; FAM109A; FAM117B; FAM118B; FAM177B; FAM212A; FAM213A; FAM228A; FAM228B; FAM46A; FARS2; FASTK; FBF1; FBXO15; FBXO3; FBXO46; FBXW5; FCF1P2; FCHO1; FES; FHL3; FHL5; FIP1L1; FKBP1B; FLAD1; FLCN; FLJ12334; FLJ21127; FLJ30092; FLJ35700; FLJ39616; FLJ42875; FLJ43860; FLT1; FMN2; FN1; FNDC1; FOS; FOXRED1; FURIN; G6PC3; GALK1; GALNT4; GAPDHP14; GAST; GATA2; GBT1; GBP1; GBP2; GBP4; GBP5; GCDH; GDPD5; GGX; GGT7; GGTL3; GID4; GINM1; GIP; GJC1; GNAI3; GNGT2; GNLY; GNPDA2; GOLPH3L; GON4L; GPN3; GPR22; GPX1; GRAP2; GRIN3A; GSS; GSTM4; GTF2B; GUCY1A3; HBP1; HCG27; hCT1644816.3; hCT1652322.2; hCT1815537; hCT1970935; HDAC5; HDAC9; HDC; HDDC3; HECTD4; HEMGN; HFE2; HHIPL1; HIP1; HIST1H2BD; HIVEP1; HLA-C; HLA-DQB1; HNF1A; HORMAD1; HS.443185; Hs.494277; HS.539450; hsa-miR-185; HSD17B12; HSP90B1; HSS00142168; ICA1L; ICAM1; IDS; IFIT1; IFIT2; IFIT3; IFIT5; IFT88; IGF2BP1; IGSF9; IL20RB; IL23A; IL6R; IL8; INPP5B; INPP5D; INTS10; IP6K2; IPMK; IPO7; IPO9; IREB2; IRF1; IRS2; ITCH; ITGA3; ITGB4BP; JAZF1; JB074994; KANK2; KAT3; KATNA1; KCNE2; KCNH2; KCNJ5; KCNK13; KCNK5; KCNN3; KCNQ3; KIAA1143; KIAA1324; KIAA1462; KIF14; KLC3; KLF6; KLHLDC10; KLHL18; KLHL35; LAMP2; LARGE; LATS1; LDLR; LENEP; LIMD1; LINC00189; LINC00310; LINC00857; LINGO4; LIPA; LMOD1; LOC100129828; LOC100131662; LOC283033; LOC338862; LOC340322; LOC401152; LOC402176; LOC407835; LOC646730; LOC653764; LOC729580; LPA; LPAL2; LPIN3; LPL; LRP1; LRP11; LRP6; LRRC16A; LRRC2; LRRC48; LTF; LY86; LY8MD4; MALAT1; MAN2A2; MAP1LC3A; MAP1S; MAP3K11; MAP3K4; MAP3K7CL; MAP4; MAP6; MAP9; MAPKAPK5; MAPKAPK5-AS1; MAPRE3; MARCKSL1; MARCKSL1P1; MARK4; MAT1A; MAT2A; MCART2; MCL1; MED22; MEF2C; METTL14; MFG8; MFS2B; MGC34034; MIA3; MIR1228; MIR1297; MIR1306; MIR1307; MIR185; MIR324; MIR3618; MIR384; MIR4257; MIR4258; MIR4499; MIR4693; MIR4761; MIR5188; MIR5193; MIR548AV; MIR548G; MLEC; MMP24; MMP24-AS1; MORF4L1; MORNI1; MRAS; MRG15; MRPL18; MRPL38; MRPL9; MRPS18AP1; MRPS6; MSI2; MSL2; MSL2L1; MSTO2P; MT1P3; MTAP; MTHFD1L; MTP18; MUTED; MYADM; MYBPHL; MYH7B; MYL2; MYO15A; N4BP2L2; NA; NAB2; NABP2; NAE1; NALP12; NBEAL1; NCLN; NCOA6; NCRNA00173; NDUFA4L2; NFE2L3; NGF; NICN1; NICN1-AS1; NME6; NME7; NM_015055; NM_018035; NOS3; NRG1; NT5C2; NUDT13; NUDT18; NUGGC; NUMB; NUP43; NXPH4; OAS1; OASL; OAZ2; OAZ3; OBFC1; OIT3; OPLAH; OR10H4; OSM; OVOL1; P4HA2; PAN2; PARP12; PBXIP1; PCCB; PCMT1; PCNXL3; PCSK7; PCSK9; PDE3A; PDE5A; PDGFD; PDGFRA; PDLIM4; PECAM1; PEMT; PEX10; PFAAP5; PFNA; PHACTR1; PHB; PHOSPHO1; PIK3CG; PKN2; PLAC9; PLD5; PLEKHG1; PLEKHH2; PLG; PMS2L3; PMS2P3; PMS2P3; PMVK; POC1B; PODXL; POLG2; POM121C; PPP2R2B; PPHLN1; PPP1R15A; PPP2R3A; PRICKLE2; PRICKLE2-AS3; PRKAB2; PRKCA; PRKCZ; PRO1185; PROCR; PRPSAP1; PSMA4; PSMA5; PSME3; PSRC1; PTPN23; PVRL2; PYGO2; QRICH2; RAB11FIP5; RAB20; RAET1E-AS1; RAET1G; RAI1; RALY; RANBP9; RAPH1; RASD1; RBL1; RBM6; RBPMS2; RCCD1; RELB; RELB; RER1; REST; RGS2; RHBDD1; RIT2; RNASEH2C; RND3; RNF157; RNF157-AS1; RNF181; RNF184; RNF41; ROMO1; RORC; RP11-541N10.2; RPEL; RPH3A; RPL7A; RRPB1; RUNC3A; S100A10; SARS; SCARB1; SCGN; SEC24D; SEMA6D; SERPINH1; SF3A1; SF3A3; SF3B14; SFTPB; SFTPC; SFTPD; SFXN2; SFSM2; SH2B3; SH2D4B; SH3PXD2A; SHC1; SHE; SHISA4; SHMT2; SIDT2; SIK3; SIPA1; SKAP1; SKI; SLAMF9; SLC1A1; SLC22A1; SLC22A3; SLC22A4; SLC22A5; SLC25A39; SLC2A12; SLC2A13; SLC39A5; SLC4A1; SLC4A2; SLC5A3; SLC01B1; SLIT3; SMAD3; SMARCA4; SMARCC1; SMCR3; SMG6; SNF8; SNORA16; SNORD24; SNORD36A; SNORD36B; SNORD36C; SNRPC; SNRPD2; SNX1; SNX10; SORCS2; SORT1; SOX9; SPAG9; SPATA7; SPC24; SPC25; SPG21; SPINK8; SPPL3; SPRYD4; SREBF1; SRPK1; SRPR; SRR; SSU72; ST3GAL4; ST8SIA1; STAG3L1; STAG3L3; STAT1; STAT2; STAT6; STEAP1; STK32B; STMN3; SUCLG1; SURF1; SURF2; SURF4; SURF6; SWAP70; SYP; SYPL2; SYT11; T40707; TAF1A; TAGAP; TAGLN; TAGLN2; TANGO2; TBPL1; TBX2; TBXAS1; TCF21; TCP11; TCTN1; TDGF1; TDRD10; TDRKH; TEAD3; TERT; TEX2; TEX41; TFPI; TGM3; THADA; THEM4; THEM5; TIRAP; TMA7; TMEM101; TMEM116; TMEM150A; TMEM161B; TMEM180; TMEM194A; TMEM41B; TMEM91; TMUB1; TMUB2; TNS1; TOM1L2; TOMM40; TP53I3; TP53INP2; TRAFD1; TRIB1; TRIM47; TRIM65; TRIM73; TRIP4; TRPC4AP; TSC22D2; TSPAN14; TSR1; TTC32; TTLL6; U6; U80770; UBA7; UBALD2; UBAP2L; UBC; UBE2L6; UBE2Z; UBTF; UBXD4; UBXN2A; UCA1; UFL1; UHRF1BP1; UNC13D; UNC45A; UNQ599; UNQ9391; UPP1; UQC; USMG5; USP39; USP48; USP53; UTP11L; UVRA6; VAMP5; VAMP8; VASP; VEGFA; VPS33B; WBP1L; WBP2; WBSR16; WDR12; WDR33; WDR35; WDR51B; WDR86-AS1; XRR1A; YY1; YY1AP1; Z85996.1-1; ZBTB7B; ZC3HC1; ZCRB1; ZEB2; ZEB2-AS1; ZFP36L2; ZFPM2; ZFYVE20; ZNF226; ZNF259; ZNF383; ZNF589; ZNF652</p> |

The spreadsheets in Supplemental Table II are listed in the order:

Supplemental Table II a. Key driver genes in CAD\_GWAS gene list;

Supplemental Table II b. Key driver genes in CAD\_GWAS\_lipid gene list;

Supplemental Table II c. Key driver genes in CAD\_C4D gene list;

Supplemental Table II d. Key driver genes in CAD\_C4D\_lipid gene list;

Supplemental Table II e. Key driver genes in CAD\_Extend gene list;

Supplemental Table II f. Key driver genes in CAD\_1000G gene list;

Supplemental Table II g. Key driver genes in CAD\_1000G\_Extend gene list.

Supplemental Table II h. Meta-analysis of KDA results based on seven gene lists in 14 networks (13 tissue-specific gene regulatory networks and 1 PPI network).

Supplemental Table II a. Key driver genes in CAD\_GWAS gene list. Key driver genes with red highlight are detected in at least network.

| CAD Gene List | Key Drivers | P Values    | FDR         | Belonging to CAD Genes | Network Sources      |
|---------------|-------------|-------------|-------------|------------------------|----------------------|
| CAD_GWAS      | COL6A3      | 3.90E-10    | 3.90E-09    | FALSE                  | Liver                |
| CAD_GWAS      | KNG1        | 1.25E-08    | 1.25E-07    | FALSE                  | Brain                |
| CAD_GWAS      | NM_009245   | 4.09E-07    | 2.05E-06    | FALSE                  | Brain                |
| CAD_GWAS      | DUSP1       | 3.78E-07    | 3.78E-06    | FALSE                  | Artery               |
| CAD_GWAS      | CAV1        | 4.57E-06    | 1.57E-05    | FALSE                  | Artery               |
| CAD_GWAS      | MGLL        | 4.73E-06    | 1.60E-05    | FALSE                  | Artery               |
| CAD_GWAS      | SERPINE1    | 9.67E-06    | 2.42E-05    | FALSE                  | Artery               |
| CAD_GWAS      | LUM         | 7.32E-06    | 2.44E-05    | FALSE                  | Brain                |
| CAD_GWAS      | VEGFC       | 1.27E-05    | 2.54E-05    | FALSE                  | Artery               |
| CAD_GWAS      | ZFP36L2     | 4.00E-06    | 2.68E-05    | FALSE                  | Vascular_endothelium |
| CAD_GWAS      | SH2B3       | 5.54E-06    | 2.94E-05    | TRUE                   | Vascular_endothelium |
| CAD_GWAS      | CCL2        | 1.11E-05    | 3.69E-05    | FALSE                  | Vascular_endothelium |
| CAD_GWAS      | DUSP6       | 2.66E-05    | 3.89E-05    | FALSE                  | Artery               |
| CAD_GWAS      | CAST        | 2.74E-05    | 3.91E-05    | FALSE                  | Artery               |
| CAD_GWAS      | TRIB1       | 3.16E-05    | 3.95E-05    | FALSE                  | Artery               |
| CAD_GWAS      | CCL2        | 3.85E-05    | 4.28E-05    | FALSE                  | Artery               |
| CAD_GWAS      | DUSP5       | 4.50E-05    | 4.50E-05    | FALSE                  | Artery               |
| CAD_GWAS      | HMOX1       | 4.87E-05    | 7.43E-05    | FALSE                  | Vascular_endothelium |
| CAD_GWAS      | JAG1        | 5.02E-05    | 7.50E-05    | FALSE                  | Vascular_endothelium |
| CAD_GWAS      | SAT1        | 9.98E-06    | 7.67E-05    | FALSE                  | Aorta                |
| CAD_GWAS      | PLAUR       | 5.16E-05    | 7.67E-05    | FALSE                  | Vascular_endothelium |
| CAD_GWAS      | EMP1        | 5.27E-05    | 7.84E-05    | TRUE                   | Vascular_endothelium |
| CAD_GWAS      | MAF         | 1.09E-05    | 8.74E-05    | FALSE                  | Smooth_muscle        |
| CAD_GWAS      | ACTN1       | 1.62E-05    | 8.85E-05    | FALSE                  | Aorta                |
| CAD_GWAS      | KCNK13      | 1.87E-05    | 9.36E-05    | TRUE                   | Liver                |
| CAD_GWAS      | PDCD4       | 3.38E-05    | 0.000112647 | FALSE                  | Aorta                |
| CAD_GWAS      | SDCBP       | 4.52E-05    | 0.000112974 | FALSE                  | Aorta                |
| CAD_GWAS      | DUSP6       | 1.85E-05    | 0.000119978 | FALSE                  | Smooth_muscle        |
| CAD_GWAS      | HMOX1       | 1.37E-05    | 0.000136611 | FALSE                  | Cardiac_muscle       |
| CAD_GWAS      | C3          | 0.000113123 | 0.000141404 | FALSE                  | Vascular_endothelium |
| CAD_GWAS      | SORL1       | 0.000143964 | 0.00014446  | FALSE                  | Vascular_endothelium |
| CAD_GWAS      | TCF7L2      | 8.17E-05    | 0.000161643 | FALSE                  | Aorta                |
| CAD_GWAS      | CTGF        | 3.37E-05    | 0.000168706 | FALSE                  | Cardiac_muscle       |
| CAD_GWAS      | SFRP1       | 7.10E-05    | 0.00023676  | FALSE                  | Cardiac_muscle       |
| CAD_GWAS      | ITGB5       | 8.71E-05    | 0.000290261 | FALSE                  | Smooth_muscle        |
| CAD_GWAS      | TRIB2       | 0.000208724 | 0.000521809 | FALSE                  | Cardiac_muscle       |
| CAD_GWAS      | F2          | 8.61E-05    | 0.000860973 | FALSE                  | Muscle               |
| CAD_GWAS      | COL1A1      | 0.000262743 | 0.00087581  | FALSE                  | Liver                |
| CAD_GWAS      | ADAMTS1     | 0.000402993 | 0.001007483 | FALSE                  | Smooth_muscle        |

|          |             |             |             |       |                      |
|----------|-------------|-------------|-------------|-------|----------------------|
| CAD_GWAS | LY96        | 0.00014446  | 0.00103343  | FALSE | Vascular_endothelium |
| CAD_GWAS | MTMR11      | 0.000451541 | 0.001128853 | FALSE | Liver                |
| CAD_GWAS | CXCL12      | 0.000811656 | 0.001425988 | TRUE  | Cardiac_muscle       |
| CAD_GWAS | CCND1       | 0.000870283 | 0.001496343 | FALSE | Cardiac_muscle       |
| CAD_GWAS | DUSP1       | 0.000789195 | 0.001578389 | FALSE | Smooth_muscle        |
| CAD_GWAS | APOC3       | 0.00066515  | 0.001662875 | TRUE  | Brain                |
| CAD_GWAS | LHFPL2      | 0.001357161 | 0.002261935 | FALSE | Smooth_muscle        |
| CAD_GWAS | LARGE       | 0.001363821 | 0.002273034 | TRUE  | Liver                |
| CAD_GWAS | WIPF1       | 0.001363821 | 0.002273034 | FALSE | Liver                |
| CAD_GWAS | EPS8        | 0.001806033 | 0.002580047 | FALSE | Liver                |
| CAD_GWAS | APOA5       | 0.002064846 | 0.002581058 | TRUE  | Liver                |
| CAD_GWAS | RBPMS       | 0.002515072 | 0.002961547 | FALSE | Cardiac_muscle       |
| CAD_GWAS | RND3        | 0.002607603 | 0.003013951 | FALSE | Cardiac_muscle       |
| CAD_GWAS | EFEMP1      | 0.002714358 | 0.003122763 | FALSE | Cardiac_muscle       |
| CAD_GWAS | CKLF        | 0.003016213 | 0.003351348 | FALSE | Liver                |
| CAD_GWAS | LOXL2       | 0.003818081 | 0.003818081 | FALSE | Liver                |
| CAD_GWAS | KCTD12      | 0.003164751 | 0.003830979 | FALSE | Smooth_muscle        |
| CAD_GWAS | F2          | 0.000435926 | 0.004359255 | FALSE | Adipose              |
| CAD_GWAS | EMP1        | 0.004651287 | 0.004651287 | TRUE  | Cardiac_muscle       |
| CAD_GWAS | APOA1       | 0.003219456 | 0.006438912 | TRUE  | Brain                |
| CAD_GWAS | APOA1       | 0.00132646  | 0.006632299 | TRUE  | Muscle               |
| CAD_GWAS | PHACTR1     | 0.004587929 | 0.007646549 | TRUE  | Brain                |
| CAD_GWAS | VEGFA       | 0.002337765 | 0.008109102 | TRUE  | Adipose              |
| CAD_GWAS | MCOLN1      | 0.005731326 | 0.008187608 | FALSE | Brain                |
| CAD_GWAS | MMT00019644 | 0.00244958  | 0.008477713 | FALSE | Adipose              |
| CAD_GWAS | HGD         | 0.0095898   | 0.01198725  | FALSE | Brain                |
| CAD_GWAS | KL          | 0.011608888 | 0.012735789 | FALSE | Brain                |
| CAD_GWAS | COL4A2      | 0.006927095 | 0.013758662 | TRUE  | Muscle               |
| CAD_GWAS | KNG1        | 0.007753219 | 0.014291424 | FALSE | Muscle               |
| CAD_GWAS | ALDOB       | 0.008652748 | 0.014656671 | FALSE | Muscle               |
| CAD_GWAS | SCARA3      | 0.008652748 | 0.014656671 | FALSE | Muscle               |
| CAD_GWAS | HELZ        | 0.010689486 | 0.015270695 | FALSE | Muscle               |
| CAD_GWAS | SPARC       | 0.013073267 | 0.016341584 | FALSE | Muscle               |
| CAD_GWAS | TNFAIP3     | 0.003300456 | 0.0168216   | FALSE | Smooth_muscle        |
| CAD_GWAS | MMP9        | 0.004125589 | 0.025561743 | FALSE | PPI                  |
| CAD_GWAS | FN1         | 0.005338642 | 0.02701645  | TRUE  | PPI                  |
| CAD_GWAS | CTNNB1      | 0.008466229 | 0.028220762 | FALSE | PPI                  |
| CAD_GWAS | TGFB1       | 0.012124266 | 0.030310666 | FALSE | PPI                  |
| CAD_GWAS | CD74        | 0.013368713 | 0.033421783 | FALSE | Adipose              |
| CAD_GWAS | SLC4A7      | 0.003506459 | 0.035651774 | FALSE | Smooth_muscle        |
| CAD_GWAS | IGSF10      | 0.034113846 | 0.037904273 | FALSE | Muscle               |
| CAD_GWAS | MATN2       | 0.019282765 | 0.038565529 | FALSE | PPI                  |
| CAD_GWAS | RRAD        | 0.022443991 | 0.040388568 | FALSE | Adipose              |
| CAD_GWAS | HGD         | 0.042742486 | 0.042742486 | FALSE | Muscle               |
| CAD_GWAS | ADCY5       | 0.026677325 | 0.042745594 | FALSE | Adipose              |
| CAD_GWAS | COL4A1      | 0.029787573 | 0.043829884 | TRUE  | Adipose              |
| CAD_GWAS | SERPINC1    | 0.036765977 | 0.045957472 | FALSE | Adipose              |
| CAD_GWAS | RDH16       | 0.012735789 | 0.046726945 | FALSE | Brain                |
| CAD_GWAS | ERBB4       | 0.032370318 | 0.046774284 | TRUE  | Kidney               |
| CAD_GWAS | TMEM169     | 0.032370318 | 0.046774284 | FALSE | Kidney               |
| CAD_GWAS | BC042789    | 0.033208996 | 0.047309976 | FALSE | Kidney               |
| CAD_GWAS | ITGA7       | 0.042725397 | 0.047472663 | FALSE | Adipose              |
| CAD_GWAS | NCOR2       | 0.034037802 | 0.047828522 | FALSE | Kidney               |
| CAD_GWAS | AK003941    | 0.037297337 | 0.055406219 | FALSE | Kidney               |
| CAD_GWAS | FN1         | 0.037297337 | 0.055406219 | TRUE  | Kidney               |
| CAD_GWAS | APOB        | 0.036424793 | 0.056519349 | FALSE | PPI                  |
| CAD_GWAS | COLEC12     | 0.038106203 | 0.058167113 | FALSE | Kidney               |
| CAD_GWAS | COL4A2      | 0.040743713 | 0.058840922 | TRUE  | PPI                  |
| CAD_GWAS | MCM6        | 0.059403499 | 0.059403499 | FALSE | Adipose              |
| CAD_GWAS | GEM         | 0.038915074 | 0.060880629 | FALSE | Kidney               |
| CAD_GWAS | SHC1        | 0.049934402 | 0.061219145 | FALSE | PPI                  |
| CAD_GWAS | SGK1        | 0.003830979 | 0.063390471 | FALSE | Smooth_muscle        |
| CAD_GWAS | FBLN2       | 0.055689348 | 0.065392812 | FALSE | PPI                  |
| CAD_GWAS | PRKACB      | 0.000122299 | 0.086877956 | FALSE | Aorta                |

**Supplemental Table II b. Key driver genes in CAD\_GWAS\_lipid gene list.** Key driver genes with red highlight are detected in at least network.

| CAD Gene List  | Key Drivers | P Values | FDR      | Belonging to CAD Genes | Network Sources |
|----------------|-------------|----------|----------|------------------------|-----------------|
| CAD_GWAS_lipid | COL6A3      | 4.38E-08 | 4.38E-07 | FALSE                  | Liver           |
| CAD_GWAS_lipid | LUM         | 1.11E-06 | 1.11E-05 | FALSE                  | Brain           |

|                |             |             |             |       |                      |
|----------------|-------------|-------------|-------------|-------|----------------------|
| CAD_GWAS_lipid | KCNK13      | 6.61E-06    | 3.31E-05    | TRUE  | Liver                |
| CAD_GWAS_lipid | CCL2        | 6.11E-06    | 6.11E-05    | FALSE | Vascular_endothelium |
| CAD_GWAS_lipid | SH2B3       | 3.76E-05    | 0.000187889 | TRUE  | Vascular_endothelium |
| CAD_GWAS_lipid | DUSP1       | 1.98E-05    | 0.000197696 | FALSE | Artery               |
| CAD_GWAS_lipid | MLLT11      | 6.66E-05    | 0.000220575 | FALSE | Aorta                |
| CAD_GWAS_lipid | CNIH1       | 7.15E-05    | 0.000224462 | FALSE | Aorta                |
| CAD_GWAS_lipid | PNRC1       | 9.12E-05    | 0.000237847 | FALSE | Aorta                |
| CAD_GWAS_lipid | TCF7L2      | 0.000121288 | 0.000248226 | FALSE | Aorta                |
| CAD_GWAS_lipid | SLIT2       | 0.000129435 | 0.000249993 | FALSE | Aorta                |
| CAD_GWAS_lipid | PRKACB      | 0.000145838 | 0.000253256 | FALSE | Aorta                |
| CAD_GWAS_lipid | ACTN1       | 0.000194659 | 0.000261255 | FALSE | Aorta                |
| CAD_GWAS_lipid | PDCD4       | 0.000209847 | 0.000265792 | FALSE | Aorta                |
| CAD_GWAS_lipid | BNIP3L      | 0.000287527 | 0.000295381 | FALSE | Aorta                |
| CAD_GWAS_lipid | COL1A1      | 8.92E-05    | 0.000297309 | FALSE | Liver                |
| CAD_GWAS_lipid | PLAUR       | 0.000157011 | 0.000355172 | FALSE | Vascular_endothelium |
| CAD_GWAS_lipid | MTMR11      | 0.00015168  | 0.0003792   | FALSE | Liver                |
| CAD_GWAS_lipid | JAG1        | 0.000200786 | 0.000385818 | FALSE | Vascular_endothelium |
| CAD_GWAS_lipid | LY96        | 0.000218498 | 0.000403158 | FALSE | Vascular_endothelium |
| CAD_GWAS_lipid | RND3        | 0.000230917 | 0.000414549 | FALSE | Vascular_endothelium |
| CAD_GWAS_lipid | IGFBP6      | 8.86E-05    | 0.00044295  | FALSE | Artery               |
| CAD_GWAS_lipid | CAV1        | 0.000155947 | 0.000473888 | FALSE | Artery               |
| CAD_GWAS_lipid | SERPINE1    | 0.000191879 | 0.00048489  | FALSE | Artery               |
| CAD_GWAS_lipid | AKT3        | 0.000249078 | 0.000498156 | FALSE | Artery               |
| CAD_GWAS_lipid | COL5A2      | 0.000387735 | 0.00052346  | FALSE | Vascular_endothelium |
| CAD_GWAS_lipid | ZFP36L2     | 0.000427066 | 0.000539836 | FALSE | Vascular_endothelium |
| CAD_GWAS_lipid | FAS         | 0.000568724 | 0.000575933 | FALSE | Vascular_endothelium |
| CAD_GWAS_lipid | MGLL        | 0.000438943 | 0.000649184 | FALSE | Artery               |
| CAD_GWAS_lipid | CNN3        | 0.000570899 | 0.000721254 | FALSE | Artery               |
| CAD_GWAS_lipid | ANXA1       | 0.000632175 | 0.000748232 | FALSE | Artery               |
| CAD_GWAS_lipid | SERPINH1    | 0.000647242 | 0.000754494 | FALSE | Artery               |
| CAD_GWAS_lipid | KCTD12      | 0.000817066 | 0.000817066 | FALSE | Artery               |
| CAD_GWAS_lipid | MAF         | 9.15E-05    | 0.000914589 | FALSE | Smooth_muscle        |
| CAD_GWAS_lipid | DUSP6       | 0.000309948 | 0.001328244 | FALSE | Smooth_muscle        |
| CAD_GWAS_lipid | LARGE       | 0.00084687  | 0.00141145  | TRUE  | Liver                |
| CAD_GWAS_lipid | WIPF1       | 0.00084687  | 0.00141145  | FALSE | Liver                |
| CAD_GWAS_lipid | EPS8        | 0.001105451 | 0.001579216 | FALSE | Liver                |
| CAD_GWAS_lipid | ADAMTS1     | 0.00041394  | 0.002166074 | FALSE | Smooth_muscle        |
| CAD_GWAS_lipid | CKLF        | 0.001797606 | 0.002247007 | FALSE | Liver                |
| CAD_GWAS_lipid | CXCL12      | 0.002778417 | 0.00308713  | TRUE  | Liver                |
| CAD_GWAS_lipid | SRPX        | 0.000575933 | 0.004140986 | FALSE | Vascular_endothelium |
| CAD_GWAS_lipid | MMT00002956 | 0.004956035 | 0.004956035 | FALSE | Liver                |
| CAD_GWAS_lipid | SLC2A3      | 0.000295381 | 0.007534392 | FALSE | Aorta                |
| CAD_GWAS_lipid | SFRP1       | 0.001091951 | 0.008618538 | FALSE | Cardiac_muscle       |
| CAD_GWAS_lipid | HMOX1       | 0.001864935 | 0.009493368 | FALSE | Cardiac_muscle       |
| CAD_GWAS_lipid | TRIB2       | 0.002937893 | 0.009792976 | FALSE | Cardiac_muscle       |
| CAD_GWAS_lipid | PHACTR1     | 0.002435576 | 0.00996116  | TRUE  | Brain                |
| CAD_GWAS_lipid | CD74        | 0.001166917 | 0.011669173 | FALSE | Adipose              |
| CAD_GWAS_lipid | CTGF        | 0.004749154 | 0.011872886 | FALSE | Cardiac_muscle       |
| CAD_GWAS_lipid | MCOLN1      | 0.003044786 | 0.016049166 | FALSE | Brain                |
| CAD_GWAS_lipid | LHFPL2      | 0.011128221 | 0.023092513 | FALSE | Smooth_muscle        |
| CAD_GWAS_lipid | DUSP1       | 0.0137867   | 0.024499619 | FALSE | Smooth_muscle        |
| CAD_GWAS_lipid | KCTD12      | 0.014598953 | 0.024688138 | FALSE | Smooth_muscle        |
| CAD_GWAS_lipid | VEGFA       | 0.009533491 | 0.025538385 | FALSE | Adipose              |
| CAD_GWAS_lipid | SLC4A7      | 0.019843577 | 0.025725582 | FALSE | Smooth_muscle        |
| CAD_GWAS_lipid | ITGA7       | 0.010384847 | 0.026415883 | FALSE | Adipose              |
| CAD_GWAS_lipid | MMT00019644 | 0.010384847 | 0.026415883 | FALSE | Adipose              |
| CAD_GWAS_lipid | ACKR3       | 0.02096515  | 0.038963809 | FALSE | Cardiac_muscle       |
| CAD_GWAS_lipid | CXCL12      | 0.022396979 | 0.039384685 | TRUE  | Adipose              |
| CAD_GWAS_lipid | CD14        | 0.024003626 | 0.040712501 | FALSE | Adipose              |
| CAD_GWAS_lipid | RBPMS       | 0.024274449 | 0.042786554 | FALSE | Cardiac_muscle       |
| CAD_GWAS_lipid | LYVE1       | 0.033349729 | 0.047642469 | FALSE | Adipose              |
| CAD_GWAS_lipid | SGK1        | 0.021540162 | 0.055639894 | FALSE | Smooth_muscle        |
| CAD_GWAS_lipid | HAVCR2      | 0.045120329 | 0.056400412 | FALSE | Adipose              |
| CAD_GWAS_lipid | TBC1D9      | 0.044090304 | 0.062986149 | FALSE | Cardiac_muscle       |
| CAD_GWAS_lipid | KANK1       | 0.058553976 | 0.063558804 | FALSE | Cardiac_muscle       |
| CAD_GWAS_lipid | ACCN1       | 0.006494572 | 0.064945716 | FALSE | Islet                |
| CAD_GWAS_lipid | COL4A2      | 0.007204289 | 0.072042887 | TRUE  | Muscle               |
| CAD_GWAS_lipid | NCOR2       | 0.014867707 | 0.08386397  | FALSE | Kidney               |
| CAD_GWAS_lipid | GEM         | 0.017276253 | 0.09320353  | FALSE | Kidney               |
| CAD_GWAS_lipid | TNFAIP3     | 0.023905956 | 0.094191343 | FALSE | Smooth_muscle        |
| CAD_GWAS_lipid | MPRIP       | 0.062867871 | 0.095832082 | FALSE | Cardiac_muscle       |

**Supplemental Table II c. Key driver genes in CAD\_C4D gene list. Key driver genes with red highlight are detected in at least network.**

| CAD Gene List | Key Drivers | P Values    | FDR         | Belonging to CAD Genes | Network Sources      |
|---------------|-------------|-------------|-------------|------------------------|----------------------|
| CAD_C4D       | F2          | 6.86E-11    | 6.86E-10    | FALSE                  | Adipose              |
| CAD_C4D       | CD93        | 8.15E-09    | 8.15E-08    | FALSE                  | Aorta                |
| CAD_C4D       | C3          | 1.06E-08    | 8.80E-08    | FALSE                  | Vascular_endothelium |
| CAD_C4D       | CCL2        | 1.84E-08    | 1.09E-07    | FALSE                  | Vascular_endothelium |
| CAD_C4D       | EMP1        | 5.24E-08    | 1.75E-07    | TRUE                   | Vascular_endothelium |
| CAD_C4D       | SAT1        | 4.13E-08    | 2.07E-07    | FALSE                  | Aorta                |
| CAD_C4D       | TMX4        | 6.34E-08    | 2.10E-07    | FALSE                  | Aorta                |
| CAD_C4D       | RGS2        | 8.42E-08    | 2.21E-07    | TRUE                   | Aorta                |
| CAD_C4D       | C8orf4      | 1.24E-07    | 2.48E-07    | FALSE                  | Aorta                |
| CAD_C4D       | PDCD4       | 2.00E-07    | 3.33E-07    | FALSE                  | Aorta                |
| CAD_C4D       | PNRC1       | 4.36E-07    | 6.23E-07    | FALSE                  | Aorta                |
| CAD_C4D       | LYN         | 5.07E-07    | 6.34E-07    | FALSE                  | Aorta                |
| CAD_C4D       | ZFP36L2     | 2.77E-07    | 6.93E-07    | FALSE                  | Vascular_endothelium |
| CAD_C4D       | JAG1        | 3.51E-07    | 7.03E-07    | FALSE                  | Vascular_endothelium |
| CAD_C4D       | DUSP1       | 1.16E-07    | 8.26E-07    | FALSE                  | Artery               |
| CAD_C4D       | JUN         | 5.18E-07    | 8.63E-07    | FALSE                  | Vascular_endothelium |
| CAD_C4D       | CCL2        | 1.71E-07    | 9.48E-07    | FALSE                  | Artery               |
| CAD_C4D       | SH2B3       | 7.00E-07    | 1.00E-06    | TRUE                   | Vascular_endothelium |
| CAD_C4D       | ACTN1       | 9.11E-07    | 1.01E-06    | FALSE                  | Aorta                |
| CAD_C4D       | ELL2        | 1.14E-06    | 1.14E-06    | FALSE                  | Aorta                |
| CAD_C4D       | PODXL       | 9.76E-07    | 1.22E-06    | TRUE                   | Vascular_endothelium |
| CAD_C4D       | VEGFA       | 3.27E-07    | 1.51E-06    | TRUE                   | Adipose              |
| CAD_C4D       | HLA-F       | 6.02E-07    | 1.57E-06    | FALSE                  | Artery               |
| CAD_C4D       | ANXA1       | 6.98E-07    | 1.65E-06    | FALSE                  | Artery               |
| CAD_C4D       | RCAN1       | 8.25E-07    | 1.74E-06    | FALSE                  | Artery               |
| CAD_C4D       | DUSP5       | 1.16E-06    | 1.93E-06    | FALSE                  | Artery               |
| CAD_C4D       | G0S2        | 1.88E-06    | 2.32E-06    | FALSE                  | Artery               |
| CAD_C4D       | ADM         | 2.01E-06    | 2.38E-06    | FALSE                  | Artery               |
| CAD_C4D       | MMT00019644 | 4.63E-07    | 2.43E-06    | FALSE                  | Adipose              |
| CAD_C4D       | RFTN1       | 2.14E-06    | 2.45E-06    | FALSE                  | Artery               |
| CAD_C4D       | KLF10       | 2.76E-06    | 2.76E-06    | FALSE                  | Artery               |
| CAD_C4D       | SRPX        | 2.49E-06    | 2.77E-06    | FALSE                  | Vascular_endothelium |
| CAD_C4D       | F3          | 3.05E-06    | 3.05E-06    | FALSE                  | Vascular_endothelium |
| CAD_C4D       | CTGF        | 5.69E-07    | 3.88E-06    | FALSE                  | Cardiac_muscle       |
| CAD_C4D       | CCND1       | 8.02E-07    | 6.17E-06    | FALSE                  | Cardiac_muscle       |
| CAD_C4D       | PLG         | 6.81E-06    | 1.70E-05    | TRUE                   | Adipose              |
| CAD_C4D       | DUSP6       | 1.32E-05    | 4.40E-05    | FALSE                  | Cardiac_muscle       |
| CAD_C4D       | MAF         | 5.30E-06    | 5.30E-05    | FALSE                  | Smooth_muscle        |
| CAD_C4D       | TNFAIP8     | 2.54E-05    | 6.34E-05    | FALSE                  | Cardiac_muscle       |
| CAD_C4D       | EFEMP1      | 5.13E-05    | 9.16E-05    | FALSE                  | Cardiac_muscle       |
| CAD_C4D       | PAPSS2      | 5.60E-05    | 9.78E-05    | FALSE                  | Cardiac_muscle       |
| CAD_C4D       | ABCG5       | 4.99E-05    | 9.97E-05    | TRUE                   | Adipose              |
| CAD_C4D       | ADAMTS1     | 2.24E-05    | 0.00011199  | FALSE                  | Smooth_muscle        |
| CAD_C4D       | EMP1        | 0.000129002 | 0.000184288 | TRUE                   | Cardiac_muscle       |
| CAD_C4D       | KCTD12      | 5.58E-05    | 0.000186159 | FALSE                  | Smooth_muscle        |
| CAD_C4D       | C1R         | 0.000175679 | 0.000219599 | FALSE                  | Cardiac_muscle       |
| CAD_C4D       | DPYD        | 0.000262958 | 0.000292176 | FALSE                  | Cardiac_muscle       |
| CAD_C4D       | DUSP1       | 0.00015651  | 0.000326882 | FALSE                  | Smooth_muscle        |
| CAD_C4D       | DUSP6       | 0.000165388 | 0.000333898 | FALSE                  | Smooth_muscle        |
| CAD_C4D       | ITGB5       | 0.000267745 | 0.000389386 | FALSE                  | Smooth_muscle        |
| CAD_C4D       | TRIB2       | 0.000436158 | 0.000436158 | FALSE                  | Cardiac_muscle       |
| CAD_C4D       | AZGP1       | 0.000262549 | 0.000437581 | FALSE                  | Adipose              |
| CAD_C4D       | APOB        | 0.000759449 | 0.001084927 | TRUE                   | Adipose              |
| CAD_C4D       | MMP9        | 0.000111306 | 0.001113064 | FALSE                  | PPI                  |
| CAD_C4D       | COL5A1      | 0.001207701 | 0.001509626 | FALSE                  | Adipose              |
| CAD_C4D       | APOA1       | 0.002260732 | 0.002511924 | TRUE                   | Adipose              |
| CAD_C4D       | LAMA2       | 0.002741304 | 0.002741304 | FALSE                  | Adipose              |
| CAD_C4D       | OSM         | 0.001779516 | 0.005644107 | TRUE                   | PPI                  |
| CAD_C4D       | TGFB1       | 0.001779516 | 0.005644107 | FALSE                  | PPI                  |
| CAD_C4D       | LDLR        | 0.002323124 | 0.006262867 | TRUE                   | PPI                  |
| CAD_C4D       | MATN2       | 0.003776347 | 0.007552693 | FALSE                  | PPI                  |
| CAD_C4D       | APOB        | 0.010384441 | 0.017307401 | TRUE                   | PPI                  |
| CAD_C4D       | COL6A3      | 0.003097879 | 0.017595283 | FALSE                  | Liver                |
| CAD_C4D       | COL4A2      | 0.012379781 | 0.017685402 | TRUE                   | PPI                  |
| CAD_C4D       | KNG1        | 0.001788614 | 0.017886137 | FALSE                  | Brain                |
| CAD_C4D       | HGD         | 0.006004892 | 0.019976877 | FALSE                  | Muscle               |
| CAD_C4D       | FN1         | 0.018162221 | 0.021794539 | TRUE                   | PPI                  |
| CAD_C4D       | APOC2       | 0.00801654  | 0.022048381 | TRUE                   | Muscle               |



|         |               |             |             |       |               |
|---------|---------------|-------------|-------------|-------|---------------|
| CAD_C4D | <b>KNG1</b>   | 0.008542234 | 0.022513379 | FALSE | Muscle        |
| CAD_C4D | NGRN          | 0.007925296 | 0.023311984 | FALSE | Liver         |
| CAD_C4D | <b>RDH16</b>  | 0.010512081 | 0.023551715 | FALSE | Muscle        |
| CAD_C4D | APOF          | 0.013384436 | 0.023812025 | FALSE | Muscle        |
| CAD_C4D | <b>F2</b>     | 0.014081304 | 0.0238678   | FALSE | Muscle        |
| CAD_C4D | GC            | 0.018352302 | 0.024165468 | FALSE | Muscle        |
| CAD_C4D | FBLN2         | 0.020128679 | 0.024603885 | FALSE | PPI           |
| CAD_C4D | CFB           | 0.00656752  | 0.027102596 | FALSE | Brain         |
| CAD_C4D | IL15RA        | 0.017191994 | 0.028291738 | FALSE | Liver         |
| CAD_C4D | ZBTB44        | 0.020926679 | 0.028407456 | FALSE | Liver         |
| CAD_C4D | COL1A1        | 0.021999756 | 0.028437446 | FALSE | Liver         |
| CAD_C4D | LOXL2         | 0.023338719 | 0.028473182 | FALSE | Liver         |
| CAD_C4D | ABCG8         | 0.025024824 | 0.028515807 | TRUE  | Liver         |
| CAD_C4D | CXCL12        | 0.025024824 | 0.028515807 | TRUE  | Liver         |
| CAD_C4D | MTMR11        | 0.025443165 | 0.028526008 | FALSE | Liver         |
| CAD_C4D | SERPINE1      | 0.028598742 | 0.028598742 | FALSE | Liver         |
| CAD_C4D | ACVR1C        | 0.011107056 | 0.031355151 | FALSE | Brain         |
| CAD_C4D | <b>HGD</b>    | 0.012024532 | 0.032077425 | FALSE | Brain         |
| CAD_C4D | APOC4         | 0.023020999 | 0.038298337 | TRUE  | Brain         |
| CAD_C4D | NM_009245     | 0.023845301 | 0.038652854 | FALSE | Brain         |
| CAD_C4D | <b>APOA1</b>  | 0.027296504 | 0.039808695 | TRUE  | Brain         |
| CAD_C4D | KL            | 0.039376058 | 0.042868938 | FALSE | Brain         |
| CAD_C4D | <b>RDH16</b>  | 0.040517104 | 0.055073056 | FALSE | Brain         |
| CAD_C4D | FBP1          | 0.020114077 | 0.057116353 | FALSE | Muscle        |
| CAD_C4D | TNFRSF1A      | 0.0003497   | 0.06617493  | FALSE | Smooth_muscle |
| CAD_C4D | <b>PAPSS2</b> | 0.000362714 | 0.075272243 | FALSE | Smooth_muscle |
| CAD_C4D | <b>ADM</b>    | 0.000362727 | 0.075281126 | FALSE | Smooth_muscle |
| CAD_C4D | LUM           | 0.042868938 | 0.079372558 | FALSE | Brain         |

**Supplemental Table II d. Key driver genes in CAD\_C4D\_lipid gene list.** Key driver genes with red highlight are detected in at least network.

| CAD Gene List | Key Drivers   | P Values    | FDR         | Belonging to CAD Genes | Network Sources      |
|---------------|---------------|-------------|-------------|------------------------|----------------------|
| CAD_C4D_lipid | <b>CD93</b>   | 2.22E-07    | 2.22E-06    | FALSE                  | Aorta                |
| CAD_C4D_lipid | MGP           | 1.61E-06    | 8.03E-06    | FALSE                  | Aorta                |
| CAD_C4D_lipid | IL15RA        | 1.14E-06    | 1.14E-05    | FALSE                  | Liver                |
| CAD_C4D_lipid | <b>BMPR2</b>  | 5.25E-06    | 1.75E-05    | FALSE                  | Aorta                |
| CAD_C4D_lipid | <b>KLF10</b>  | 8.84E-06    | 1.84E-05    | FALSE                  | Aorta                |
| CAD_C4D_lipid | COL18A1       | 9.24E-06    | 1.87E-05    | FALSE                  | Aorta                |
| CAD_C4D_lipid | NR2F1         | 1.41E-05    | 2.35E-05    | FALSE                  | Aorta                |
| CAD_C4D_lipid | ACVR1C        | 2.84E-06    | 2.84E-05    | FALSE                  | Brain                |
| CAD_C4D_lipid | <b>DUSP6</b>  | 2.12E-05    | 3.03E-05    | FALSE                  | Aorta                |
| CAD_C4D_lipid | WWC2          | 2.97E-05    | 3.71E-05    | FALSE                  | Aorta                |
| CAD_C4D_lipid | <b>KCTD12</b> | 3.79E-05    | 4.22E-05    | FALSE                  | Aorta                |
| CAD_C4D_lipid | ADAM9         | 4.36E-05    | 4.36E-05    | FALSE                  | Aorta                |
| CAD_C4D_lipid | PODXL         | 7.38E-06    | 6.36E-05    | TRUE                   | Vascular_endothelium |
| CAD_C4D_lipid | ZNF496        | 1.77E-05    | 8.87E-05    | FALSE                  | Liver                |
| CAD_C4D_lipid | <b>KCTD12</b> | 1.36E-05    | 0.000109815 | FALSE                  | Vascular_endothelium |
| CAD_C4D_lipid | JAG1          | 0.000135207 | 0.000450692 | FALSE                  | Vascular_endothelium |
| CAD_C4D_lipid | LTBP1         | 4.95E-05    | 0.000495089 | FALSE                  | Cardiac_muscle       |
| CAD_C4D_lipid | <b>CCL2</b>   | 5.17E-05    | 0.000517193 | FALSE                  | Artery               |
| CAD_C4D_lipid | PTRF          | 0.000105934 | 0.000529671 | FALSE                  | Cardiac_muscle       |
| CAD_C4D_lipid | <b>KLF10</b>  | 0.00023449  | 0.000988435 | FALSE                  | Artery               |
| CAD_C4D_lipid | COL6A3        | 0.000319467 | 0.001064891 | FALSE                  | Liver                |
| CAD_C4D_lipid | COL1A1        | 0.000436603 | 0.001091508 | FALSE                  | Liver                |
| CAD_C4D_lipid | AXL           | 0.000379624 | 0.001174878 | FALSE                  | Artery               |
| CAD_C4D_lipid | <b>KCTD12</b> | 0.000445301 | 0.001269598 | FALSE                  | Artery               |
| CAD_C4D_lipid | <b>CCL2</b>   | 0.000849798 | 0.001318288 | FALSE                  | Vascular_endothelium |
| CAD_C4D_lipid | SRPX          | 0.000850024 | 0.001387237 | FALSE                  | Vascular_endothelium |
| CAD_C4D_lipid | CTGF          | 0.000628784 | 0.001635742 | FALSE                  | Cardiac_muscle       |
| CAD_C4D_lipid | ZCCHC24       | 0.000941009 | 0.001729202 | FALSE                  | Artery               |
| CAD_C4D_lipid | <b>DUSP6</b>  | 0.000740389 | 0.001744439 | FALSE                  | Cardiac_muscle       |
| CAD_C4D_lipid | ANXA1         | 0.001060275 | 0.001782707 | FALSE                  | Artery               |
| CAD_C4D_lipid | SERPINE1      | 0.001312613 | 0.001839237 | FALSE                  | Artery               |
| CAD_C4D_lipid | HHEX          | 0.001484621 | 0.001897308 | FALSE                  | Artery               |
| CAD_C4D_lipid | S100A10       | 0.00087255  | 0.001915582 | FALSE                  | Cardiac_muscle       |
| CAD_C4D_lipid | M93275        | 0.000420832 | 0.002104162 | FALSE                  | Brain                |
| CAD_C4D_lipid | SMAD3         | 0.002012781 | 0.002106534 | TRUE                   | Artery               |
| CAD_C4D_lipid | OSM           | 0.000230067 | 0.002300675 | TRUE                   | PPI                  |
| CAD_C4D_lipid | CDC42EP3      | 0.002026903 | 0.002833676 | FALSE                  | Cardiac_muscle       |
| CAD_C4D_lipid | ZNF467        | 0.002603144 | 0.005206288 | FALSE                  | Liver                |

|               |               |             |             |       |                      |
|---------------|---------------|-------------|-------------|-------|----------------------|
| CAD_C4D_lipid | AK007927      | 0.001040834 | 0.006955244 | FALSE | Muscle               |
| CAD_C4D_lipid | BTNL9         | 0.004248225 | 0.007080375 | FALSE | Liver                |
| CAD_C4D_lipid | <b>KCTD12</b> | 0.000911447 | 0.007445112 | FALSE | Smooth_muscle        |
| CAD_C4D_lipid | LOXL2         | 0.005320233 | 0.007600332 | FALSE | Liver                |
| CAD_C4D_lipid | <b>CXCL12</b> | 0.006587188 | 0.008072175 | TRUE  | Liver                |
| CAD_C4D_lipid | COL3A1        | 0.00161804  | 0.008110665 | FALSE | Smooth_muscle        |
| CAD_C4D_lipid | ASAH1         | 0.001462569 | 0.008130552 | FALSE | Muscle               |
| CAD_C4D_lipid | TRIM8         | 0.00263142  | 0.008147015 | FALSE | Smooth_muscle        |
| CAD_C4D_lipid | <b>BMPR2</b>  | 0.003262127 | 0.008730997 | FALSE | Smooth_muscle        |
| CAD_C4D_lipid | DENND5A       | 0.006132861 | 0.012265722 | FALSE | Smooth_muscle        |
| CAD_C4D_lipid | STAT3         | 0.003065905 | 0.012736125 | FALSE | PPI                  |
| CAD_C4D_lipid | TNFRSF1A      | 0.008184721 | 0.013641202 | FALSE | Smooth_muscle        |
| CAD_C4D_lipid | COL5A1        | 0.001388926 | 0.013889256 | FALSE | Adipose              |
| CAD_C4D_lipid | COASY         | 0.004602257 | 0.01403315  | FALSE | Muscle               |
| CAD_C4D_lipid | COL4A2        | 0.00588487  | 0.014761635 | TRUE  | Muscle               |
| CAD_C4D_lipid | LOXL1         | 0.007428981 | 0.014857962 | FALSE | Muscle               |
| CAD_C4D_lipid | SMAD1         | 0.005222298 | 0.015998114 | FALSE | PPI                  |
| CAD_C4D_lipid | KCNMA1        | 0.002106534 | 0.016272135 | FALSE | Artery               |
| CAD_C4D_lipid | SPARC         | 0.011445185 | 0.016978191 | FALSE | Muscle               |
| CAD_C4D_lipid | MMP9          | 0.005820336 | 0.017156894 | FALSE | PPI                  |
| CAD_C4D_lipid | POR           | 0.012670442 | 0.01749615  | FALSE | Muscle               |
| CAD_C4D_lipid | <b>CXCL12</b> | 0.013994209 | 0.018544087 | TRUE  | Muscle               |
| CAD_C4D_lipid | PHACTR1       | 0.005951423 | 0.019838078 | TRUE  | Brain                |
| CAD_C4D_lipid | MMT00005552   | 0.020379601 | 0.022644001 | FALSE | Muscle               |
| CAD_C4D_lipid | GABRA4        | 0.009457379 | 0.023643448 | FALSE | Brain                |
| CAD_C4D_lipid | TRIM22        | 0.000933139 | 0.02562145  | FALSE | Vascular_endothelium |
| CAD_C4D_lipid | TGFB1         | 0.015036785 | 0.027972826 | FALSE | PPI                  |
| CAD_C4D_lipid | CDK4          | 0.017297963 | 0.029215203 | FALSE | PPI                  |
| CAD_C4D_lipid | MATN2         | 0.025068258 | 0.031335323 | FALSE | PPI                  |
| CAD_C4D_lipid | PDZD3         | 0.025068258 | 0.031335323 | FALSE | PPI                  |
| CAD_C4D_lipid | PTPRB         | 0.013349378 | 0.033111294 | FALSE | Adipose              |
| CAD_C4D_lipid | SLC4A3        | 0.016027838 | 0.034900553 | FALSE | Adipose              |
| CAD_C4D_lipid | ATP6V0A1      | 0.025508769 | 0.036166218 | FALSE | Brain                |
| CAD_C4D_lipid | DCT           | 0.020128046 | 0.037196154 | FALSE | Adipose              |
| CAD_C4D_lipid | VPS33A        | 0.020128046 | 0.037196154 | FALSE | Adipose              |
| CAD_C4D_lipid | TCF3          | 0.026578644 | 0.039473495 | FALSE | Adipose              |
| CAD_C4D_lipid | CYP1B1        | 0.030376184 | 0.039878758 | FALSE | Brain                |
| CAD_C4D_lipid | VAV3          | 0.030376184 | 0.039878758 | FALSE | Brain                |
| CAD_C4D_lipid | ZEB2          | 0.030376184 | 0.039878758 | TRUE  | Brain                |
| CAD_C4D_lipid | OSBPL11       | 0.028382534 | 0.039983216 | FALSE | Adipose              |
| CAD_C4D_lipid | TNXB          | 0.030267779 | 0.040487885 | FALSE | Adipose              |
| CAD_C4D_lipid | PLCG1         | 0.036440817 | 0.040489796 | FALSE | PPI                  |
| CAD_C4D_lipid | QKI           | 0.029476609 | 0.042109442 | FALSE | Smooth_muscle        |
| CAD_C4D_lipid | AK013470      | 0.043430526 | 0.043430526 | FALSE | Adipose              |
| CAD_C4D_lipid | LAMA2         | 0.043430526 | 0.043430526 | FALSE | Adipose              |
| CAD_C4D_lipid | PXDC1         | 0.002415641 | 0.053138196 | FALSE | Cardiac_muscle       |
| CAD_C4D_lipid | <b>CD93</b>   | 0.056607274 | 0.056607274 | FALSE | PPI                  |
| CAD_C4D_lipid | F3            | 0.002453576 | 0.057646029 | FALSE | Cardiac_muscle       |
| CAD_C4D_lipid | COL6A1        | 0.001072662 | 0.062164777 | FALSE | Vascular_endothelium |
| CAD_C4D_lipid | PAPSS2        | 0.056260768 | 0.064676865 | FALSE | Smooth_muscle        |
| CAD_C4D_lipid | NCOR2         | 0.018593487 | 0.070087843 | FALSE | Kidney               |
| CAD_C4D_lipid | NGRN          | 0.008072175 | 0.075887794 | FALSE | Liver                |
| CAD_C4D_lipid | PCOLCE2       | 0.008072175 | 0.075887794 | FALSE | Liver                |
| CAD_C4D_lipid | ZDHHC17       | 0.075728996 | 0.084143329 | FALSE | Brain                |
| CAD_C4D_lipid | TNFAIP8       | 0.002693741 | 0.084803523 | FALSE | Cardiac_muscle       |
| CAD_C4D_lipid | KIF1B         | 0.060722019 | 0.098076661 | FALSE | Smooth_muscle        |
| CAD_C4D_lipid | ENG           | 0.001233888 | 0.099315847 | FALSE | Vascular_endothelium |
| CAD_C4D_lipid | CCND1         | 0.002833676 | 0.099634522 | FALSE | Cardiac_muscle       |

**Supplemental Table II e. Key driver genes in CAD\_Extend gene list.** Key driver genes with red highlight are detected in at least networks.

| CAD Gene List | Key Drivers | P Values | FDR      | Belonging to CAD Genes | Network Sources |
|---------------|-------------|----------|----------|------------------------|-----------------|
| CAD_Extend    | C8orf4      | 7.46E-10 | 7.46E-09 | FALSE                  | Aorta           |
| CAD_Extend    | MFGE8       | 1.74E-09 | 8.70E-09 | FALSE                  | Aorta           |
| CAD_Extend    | <b>JUN</b>  | 1.57E-09 | 1.20E-08 | FALSE                  | Artery          |
| CAD_Extend    | DUSP5       | 2.48E-09 | 1.33E-08 | FALSE                  | Artery          |
| CAD_Extend    | DUSP1       | 4.79E-09 | 1.60E-08 | FALSE                  | Artery          |
| CAD_Extend    | HLA-DPB1    | 1.51E-08 | 3.86E-08 | FALSE                  | Aorta           |
| CAD_Extend    | AXL         | 2.45E-08 | 4.62E-08 | FALSE                  | Aorta           |
| CAD_Extend    | CCL18       | 2.53E-08 | 4.68E-08 | FALSE                  | Aorta           |

|            |             |             |             |       |                      |
|------------|-------------|-------------|-------------|-------|----------------------|
| CAD_Extend | LRP1        | 2.65E-08    | 4.78E-08    | FALSE | Aorta                |
| CAD_Extend | BGN         | 3.94E-08    | 5.63E-08    | FALSE | Aorta                |
| CAD_Extend | TAGLN2      | 5.75E-08    | 7.18E-08    | FALSE | Aorta                |
| CAD_Extend | ITGB4       | 7.18E-08    | 7.98E-08    | FALSE | Aorta                |
| CAD_Extend | DUSP6       | 9.01E-08    | 9.01E-08    | FALSE | Aorta                |
| CAD_Extend | DUSP6       | 1.23E-08    | 1.23E-07    | FALSE | Vascular_endothelium |
| CAD_Extend | IFI44       | 6.71E-08    | 1.39E-07    | FALSE | Artery               |
| CAD_Extend | IFI35       | 6.99E-08    | 1.41E-07    | FALSE | Artery               |
| CAD_Extend | ICAM1       | 5.01E-08    | 1.45E-07    | FALSE | Vascular_endothelium |
| CAD_Extend | TIMP3       | 8.88E-08    | 1.48E-07    | FALSE | Artery               |
| CAD_Extend | C3          | 5.48E-08    | 1.48E-07    | FALSE | Vascular_endothelium |
| CAD_Extend | KLF4        | 5.84E-08    | 1.63E-07    | FALSE | Vascular_endothelium |
| CAD_Extend | HLA-F       | 1.19E-07    | 1.71E-07    | FALSE | Artery               |
| CAD_Extend | CDKN1A      | 1.88E-07    | 2.35E-07    | TRUE  | Artery               |
| CAD_Extend | CCL2        | 2.85E-07    | 2.89E-07    | FALSE | Artery               |
| CAD_Extend | GRN         | 3.32E-07    | 5.83E-07    | FALSE | Vascular_endothelium |
| CAD_Extend | IFI27       | 3.54E-07    | 6.06E-07    | FALSE | Vascular_endothelium |
| CAD_Extend | SH2B3       | 5.91E-07    | 8.44E-07    | TRUE  | Vascular_endothelium |
| CAD_Extend | GBP1        | 7.88E-07    | 9.85E-07    | TRUE  | Vascular_endothelium |
| CAD_Extend | PLAUR       | 1.13E-07    | 1.13E-06    | FALSE | Cardiac_muscle       |
| CAD_Extend | F3          | 1.84E-06    | 2.04E-06    | FALSE | Vascular_endothelium |
| CAD_Extend | MSN         | 2.75E-06    | 2.75E-06    | FALSE | Vascular_endothelium |
| CAD_Extend | KNG1        | 2.98E-07    | 2.98E-06    | FALSE | Brain                |
| CAD_Extend | CCND1       | 7.37E-07    | 3.39E-06    | FALSE | Cardiac_muscle       |
| CAD_Extend | AKAP12      | 1.09E-06    | 4.13E-06    | FALSE | Cardiac_muscle       |
| CAD_Extend | ATF3        | 4.29E-07    | 4.29E-06    | FALSE | Smooth_muscle        |
| CAD_Extend | KCTD12      | 2.24E-06    | 5.53E-06    | FALSE | Smooth_muscle        |
| CAD_Extend | KLF6        | 2.26E-06    | 5.54E-06    | TRUE  | Smooth_muscle        |
| CAD_Extend | DUSP6       | 2.74E-06    | 6.06E-06    | FALSE | Smooth_muscle        |
| CAD_Extend | PLAU        | 2.81E-06    | 6.17E-06    | FALSE | Smooth_muscle        |
| CAD_Extend | LMNA        | 2.53E-06    | 6.33E-06    | FALSE | Cardiac_muscle       |
| CAD_Extend | RAC2        | 3.17E-06    | 6.33E-06    | FALSE | Cardiac_muscle       |
| CAD_Extend | TNFAIP2     | 4.43E-06    | 6.86E-06    | FALSE | Cardiac_muscle       |
| CAD_Extend | IFI27       | 4.85E-06    | 7.30E-06    | FALSE | Cardiac_muscle       |
| CAD_Extend | GBP2        | 5.80E-06    | 9.67E-06    | TRUE  | Smooth_muscle        |
| CAD_Extend | TRIM8       | 7.58E-06    | 1.08E-05    | FALSE | Smooth_muscle        |
| CAD_Extend | SAT1        | 1.17E-05    | 1.46E-05    | FALSE | Cardiac_muscle       |
| CAD_Extend | TIMP3       | 1.49E-05    | 1.87E-05    | FALSE | Smooth_muscle        |
| CAD_Extend | SAT1        | 1.87E-05    | 1.88E-05    | FALSE | Smooth_muscle        |
| CAD_Extend | GBP1        | 1.13E-05    | 0.000113391 | TRUE  | Blood                |
| CAD_Extend | ANXA2       | 0.000123905 | 0.000127462 | FALSE | Cardiac_muscle       |
| CAD_Extend | COL6A3      | 1.75E-05    | 0.000174586 | FALSE | Liver                |
| CAD_Extend | MSN         | 7.48E-05    | 0.000305038 | FALSE | Liver                |
| CAD_Extend | ABCG5       | 9.49E-05    | 0.000366301 | TRUE  | Liver                |
| CAD_Extend | HGD         | 7.46E-05    | 0.000437596 | FALSE | Muscle               |
| CAD_Extend | SLIT3       | 8.95E-05    | 0.000491909 | TRUE  | Muscle               |
| CAD_Extend | MMT00021022 | 5.42E-05    | 0.000541582 | FALSE | Heart                |
| CAD_Extend | DENND5A     | 1.88E-05    | 0.001033    | FALSE | Smooth_muscle        |
| CAD_Extend | CXCL10      | 0.000510374 | 0.00111934  | FALSE | Liver                |
| CAD_Extend | ANXA3       | 0.000719928 | 0.001238177 | FALSE | Liver                |
| CAD_Extend | MTMR11      | 0.000740434 | 0.001239294 | FALSE | Liver                |
| CAD_Extend | ZBTB44      | 0.000872093 | 0.001245848 | FALSE | Liver                |
| CAD_Extend | MMT00081256 | 0.000597658 | 0.00147602  | FALSE | Muscle               |
| CAD_Extend | MAFF        | 0.001196123 | 0.001495153 | FALSE | Liver                |
| CAD_Extend | CFB         | 0.00030824  | 0.001541199 | FALSE | Brain                |
| CAD_Extend | LOXL2       | 0.001393018 | 0.001547798 | FALSE | Liver                |
| CAD_Extend | HEMGN       | 0.000719204 | 0.001579235 | TRUE  | Muscle               |
| CAD_Extend | APOF        | 0.000931824 | 0.001751151 | FALSE | Muscle               |
| CAD_Extend | FBP1        | 0.001024962 | 0.001839238 | FALSE | Muscle               |
| CAD_Extend | ABCG8       | 0.001870204 | 0.001870204 | TRUE  | Liver                |
| CAD_Extend | F2          | 0.001179508 | 0.001970369 | FALSE | Muscle               |
| CAD_Extend | APOC4       | 0.000759403 | 0.002180799 | TRUE  | Brain                |
| CAD_Extend | NM_009245   | 0.000896906 | 0.002305717 | FALSE | Brain                |
| CAD_Extend | TNFSF10     | 2.89E-07    | 0.002400977 | FALSE | Artery               |
| CAD_Extend | APOC2       | 0.001970669 | 0.002463336 | TRUE  | Muscle               |
| CAD_Extend | COL4A2      | 0.002297695 | 0.002552995 | TRUE  | Muscle               |
| CAD_Extend | KNG1        | 0.002669536 | 0.002669536 | FALSE | Muscle               |
| CAD_Extend | APOA1       | 0.001680306 | 0.00280051  | TRUE  | Brain                |
| CAD_Extend | AW475929    | 0.001680306 | 0.00280051  | FALSE | Brain                |
| CAD_Extend | NOTCH1      | 0.000386613 | 0.003866126 | FALSE | PPI                  |
| CAD_Extend | BATF2       | 0.000977451 | 0.004887256 | FALSE | Blood                |
| CAD_Extend | ACVR1C      | 0.00447158  | 0.006387971 | FALSE | Brain                |
| CAD_Extend | HGD         | 0.006547637 | 0.007275152 | FALSE | Brain                |
| CAD_Extend | TRAPPC3     | 0.006547637 | 0.007275152 | FALSE | Brain                |

|            |             |             |             |       |                |
|------------|-------------|-------------|-------------|-------|----------------|
| CAD_Extend | CTGF        | 0.000127462 | 0.007325627 | FALSE | Cardiac_muscle |
| CAD_Extend | NME6        | 0.001305695 | 0.007955052 | TRUE  | Kidney         |
| CAD_Extend | AK021074    | 0.00188318  | 0.008883334 | FALSE | Kidney         |
| CAD_Extend | MMP9        | 0.002028751 | 0.010143756 | FALSE | PPI            |
| CAD_Extend | LUM         | 0.01184934  | 0.01184934  | FALSE | Brain          |
| CAD_Extend | ANXA2       | 0.003654997 | 0.012183324 | FALSE | PPI            |
| CAD_Extend | GBP2        | 0.002653287 | 0.012300169 | TRUE  | Kidney         |
| CAD_Extend | RPUSD4      | 0.001845898 | 0.018458977 | FALSE | Islet          |
| CAD_Extend | PTCHD1      | 0.006812441 | 0.020870973 | FALSE | Adipose        |
| CAD_Extend | PLG         | 0.006974387 | 0.021046794 | TRUE  | Adipose        |
| CAD_Extend | GBP1        | 0.008498788 | 0.022576627 | TRUE  | Adipose        |
| CAD_Extend | F2          | 0.008720739 | 0.022782993 | FALSE | Adipose        |
| CAD_Extend | NM_021792   | 0.011246591 | 0.028116478 | FALSE | Kidney         |
| CAD_Extend | APOA1       | 0.017007364 | 0.028377564 | TRUE  | Adipose        |
| CAD_Extend | ATP8B2      | 0.014382099 | 0.028764197 | TRUE  | Kidney         |
| CAD_Extend | ACAD10      | 0.018655946 | 0.029193682 | TRUE  | Adipose        |
| CAD_Extend | SERPINC1    | 0.020435531 | 0.02931283  | FALSE | Adipose        |
| CAD_Extend | VEGFA       | 0.024422814 | 0.02955081  | TRUE  | Adipose        |
| CAD_Extend | MMT00019644 | 0.026649264 | 0.030291004 | FALSE | Adipose        |
| CAD_Extend | JUNB        | 0.034383023 | 0.034383023 | FALSE | Adipose        |
| CAD_Extend | COL4A2      | 0.022387772 | 0.05596943  | TRUE  | PPI            |
| CAD_Extend | SLC34A3     | 0.034467535 | 0.057445892 | FALSE | Kidney         |
| CAD_Extend | OSM         | 0.039363188 | 0.060874908 | TRUE  | PPI            |
| CAD_Extend | TGFBI       | 0.039363188 | 0.060874908 | FALSE | PPI            |
| CAD_Extend | PTPN11      | 0.042791769 | 0.061786171 | FALSE | PPI            |
| CAD_Extend | LDLR        | 0.051151933 | 0.063939916 | TRUE  | PPI            |
| CAD_Extend | JUN         | 0.072576936 | 0.08064104  | FALSE | PPI            |
| CAD_Extend | HSPA5       | 0.081739862 | 0.081739862 | FALSE | PPI            |
| CAD_Extend | GBP2        | 0.028959053 | 0.096530177 | TRUE  | Blood          |

**Supplemental Table II f. Key driver genes in CAD\_1000G gene list. Key driver genes with red highlight are detected in at least networks.**

| CAD Gene List | Key Drivers | P Values | FDR         | Belonging to CAD Genes | Network Sources      |
|---------------|-------------|----------|-------------|------------------------|----------------------|
| CAD_1000G     | SAT1        | 4.39E-09 | 4.39E-08    | FALSE                  | Aorta                |
| CAD_1000G     | RGS2        | 1.96E-08 | 9.81E-08    | TRUE                   | Aorta                |
| CAD_1000G     | CD93        | 3.62E-08 | 1.21E-07    | FALSE                  | Aorta                |
| CAD_1000G     | LYN         | 2.17E-07 | 5.43E-07    | FALSE                  | Aorta                |
| CAD_1000G     | DUSP1       | 9.24E-08 | 9.24E-07    | FALSE                  | Artery               |
| CAD_1000G     | PDCD4       | 5.11E-07 | 1.02E-06    | FALSE                  | Aorta                |
| CAD_1000G     | CFD         | 1.05E-06 | 1.75E-06    | FALSE                  | Aorta                |
| CAD_1000G     | SERPINE1    | 7.36E-07 | 2.37E-06    | FALSE                  | Artery               |
| CAD_1000G     | CCL2        | 1.17E-06 | 2.71E-06    | FALSE                  | Artery               |
| CAD_1000G     | DUSP5       | 1.27E-06 | 2.77E-06    | FALSE                  | Artery               |
| CAD_1000G     | ACTN1       | 2.13E-06 | 3.05E-06    | FALSE                  | Aorta                |
| CAD_1000G     | DUSP6       | 1.92E-06 | 3.28E-06    | FALSE                  | Artery               |
| CAD_1000G     | MGLL        | 1.95E-06 | 3.30E-06    | FALSE                  | Artery               |
| CAD_1000G     | CAV1        | 2.00E-06 | 3.33E-06    | FALSE                  | Artery               |
| CAD_1000G     | MPZL1       | 2.94E-06 | 3.67E-06    | FALSE                  | Aorta                |
| CAD_1000G     | TRIB1       | 3.20E-06 | 4.00E-06    | TRUE                   | Artery               |
| CAD_1000G     | SRPX        | 3.61E-06 | 4.01E-06    | FALSE                  | Artery               |
| CAD_1000G     | PPP1R15A    | 3.84E-06 | 4.27E-06    | FALSE                  | Aorta                |
| CAD_1000G     | SAT1        | 8.94E-07 | 5.02E-06    | FALSE                  | Vascular_endothelium |
| CAD_1000G     | CCL2        | 1.02E-06 | 5.34E-06    | FALSE                  | Vascular_endothelium |
| CAD_1000G     | DUSP1       | 5.57E-06 | 5.57E-06    | FALSE                  | Aorta                |
| CAD_1000G     | CAST        | 6.59E-06 | 6.59E-06    | FALSE                  | Artery               |
| CAD_1000G     | SORL1       | 2.92E-06 | 9.73E-06    | FALSE                  | Vascular_endothelium |
| CAD_1000G     | HMOX1       | 4.01E-06 | 1.00E-05    | FALSE                  | Vascular_endothelium |
| CAD_1000G     | F3          | 9.92E-06 | 1.38E-05    | FALSE                  | Vascular_endothelium |
| CAD_1000G     | IGFBP7      | 1.05E-05 | 1.40E-05    | FALSE                  | Vascular_endothelium |
| CAD_1000G     | C3          | 1.09E-05 | 1.43E-05    | FALSE                  | Vascular_endothelium |
| CAD_1000G     | ZFP36L2     | 1.13E-05 | 1.46E-05    | FALSE                  | Vascular_endothelium |
| CAD_1000G     | FAS         | 1.65E-05 | 1.83E-05    | FALSE                  | Vascular_endothelium |
| CAD_1000G     | DUSP6       | 2.30E-06 | 2.30E-05    | FALSE                  | Smooth_muscle        |
| CAD_1000G     | DSE         | 3.03E-05 | 3.03E-05    | FALSE                  | Vascular_endothelium |
| CAD_1000G     | MAF         | 1.33E-05 | 4.67E-05    | FALSE                  | Smooth_muscle        |
| CAD_1000G     | KCTD12      | 1.41E-05 | 4.75E-05    | FALSE                  | Smooth_muscle        |
| CAD_1000G     | PLAU        | 2.15E-05 | 5.37E-05    | FALSE                  | Smooth_muscle        |
| CAD_1000G     | ITGB5       | 3.02E-05 | 6.04E-05    | FALSE                  | Smooth_muscle        |
| CAD_1000G     | SRPX        | 4.27E-05 | 7.12E-05    | FALSE                  | Smooth_muscle        |
| CAD_1000G     | ADAMTS1     | 7.17E-05 | 0.000102372 | FALSE                  | Smooth_muscle        |

|           |             |             |             |       |                |
|-----------|-------------|-------------|-------------|-------|----------------|
| CAD_1000G | AKAP12      | 1.03E-05    | 0.000102806 | FALSE | Cardiac_muscle |
| CAD_1000G | CTSB        | 9.46E-05    | 0.000118242 | FALSE | Smooth_muscle  |
| CAD_1000G | CCND1       | 3.14E-05    | 0.000156961 | FALSE | Cardiac_muscle |
| CAD_1000G | KNG1        | 2.14E-05    | 0.000168905 | FALSE | Muscle         |
| CAD_1000G | RDH16       | 3.58E-05    | 0.000182682 | FALSE | Muscle         |
| CAD_1000G | F2          | 7.28E-05    | 0.000192941 | FALSE | Muscle         |
| CAD_1000G | HGD         | 7.74E-05    | 0.000202957 | FALSE | Muscle         |
| CAD_1000G | DUSP1       | 0.000189518 | 0.000210575 | FALSE | Smooth_muscle  |
| CAD_1000G | CTGF        | 0.000112938 | 0.000312233 | FALSE | Cardiac_muscle |
| CAD_1000G | SFRP1       | 0.000128072 | 0.000341967 | FALSE | Cardiac_muscle |
| CAD_1000G | ANXA1       | 0.000420507 | 0.000420507 | FALSE | Smooth_muscle  |
| CAD_1000G | KNG1        | 6.19E-05    | 0.000618759 | FALSE | Brain          |
| CAD_1000G | APOC2       | 0.000358657 | 0.000717313 | FALSE | Muscle         |
| CAD_1000G | HMOX1       | 0.000494275 | 0.000833298 | FALSE | Cardiac_muscle |
| CAD_1000G | CLU         | 0.000501681 | 0.000841348 | FALSE | Cardiac_muscle |
| CAD_1000G | FGF2        | 0.000857907 | 0.001225582 | FALSE | Cardiac_muscle |
| CAD_1000G | HSD17B13    | 0.000768274 | 0.001280457 | FALSE | Muscle         |
| CAD_1000G | SLC1A5      | 0.000945745 | 0.001351064 | FALSE | Muscle         |
| CAD_1000G | TRIB2       | 0.001736318 | 0.002170397 | FALSE | Cardiac_muscle |
| CAD_1000G | DUSP6       | 0.002261048 | 0.002370437 | FALSE | Cardiac_muscle |
| CAD_1000G | CFB         | 0.000581317 | 0.002627085 | FALSE | Brain          |
| CAD_1000G | COL6A3      | 0.000299159 | 0.002991594 | FALSE | Liver          |
| CAD_1000G | NM_009245   | 0.000842809 | 0.003116305 | FALSE | Brain          |
| CAD_1000G | GC          | 0.002881742 | 0.003602178 | FALSE | Muscle         |
| CAD_1000G | HGD         | 0.001753079 | 0.004382698 | FALSE | Brain          |
| CAD_1000G | LUM         | 0.002210866 | 0.004395889 | FALSE | Brain          |
| CAD_1000G | ALDH2       | 0.001449728 | 0.004914361 | TRUE  | Liver          |
| CAD_1000G | VAV3        | 0.002640621 | 0.004951997 | FALSE | Brain          |
| CAD_1000G | APOA5       | 0.001818006 | 0.005204133 | TRUE  | Liver          |
| CAD_1000G | MTMR11      | 0.002067706 | 0.005347234 | FALSE | Liver          |
| CAD_1000G | A1BG        | 0.00325398  | 0.005865502 | FALSE | Liver          |
| CAD_1000G | ITIH2       | 0.003549953 | 0.005948143 | FALSE | Liver          |
| CAD_1000G | APOA1       | 0.005395963 | 0.005995515 | TRUE  | Muscle         |
| CAD_1000G | PLG         | 0.004553041 | 0.006131709 | TRUE  | Liver          |
| CAD_1000G | KCNK13      | 0.0049292   | 0.006471743 | TRUE  | Liver          |
| CAD_1000G | F2          | 0.000668135 | 0.006681348 | FALSE | Adipose        |
| CAD_1000G | ASAH1       | 0.006696374 | 0.006696374 | FALSE | Muscle         |
| CAD_1000G | MMP9        | 0.001180469 | 0.007182905 | FALSE | PPI            |
| CAD_1000G | LDLR        | 0.00148701  | 0.008042351 | TRUE  | PPI            |
| CAD_1000G | APOC3       | 0.009433108 | 0.013475868 | TRUE  | Brain          |
| CAD_1000G | APOB        | 0.00411444  | 0.013714799 | TRUE  | PPI            |
| CAD_1000G | PLG         | 0.00282881  | 0.01414405  | TRUE  | Adipose        |
| CAD_1000G | COL1A1      | 0.013203656 | 0.014670729 | FALSE | Liver          |
| CAD_1000G | AZGP1       | 0.006486893 | 0.015224034 | FALSE | Adipose        |
| CAD_1000G | APOB        | 0.007989151 | 0.015511047 | TRUE  | Adipose        |
| CAD_1000G | APOA1       | 0.010145073 | 0.01596161  | TRUE  | Adipose        |
| CAD_1000G | SERPINC1    | 0.011101688 | 0.016437514 | FALSE | Adipose        |
| CAD_1000G | VEGFA       | 0.012115963 | 0.016904623 | TRUE  | Adipose        |
| CAD_1000G | MMT00019644 | 0.01264555  | 0.017135181 | FALSE | Adipose        |
| CAD_1000G | TUBB6       | 0.002370437 | 0.017218673 | FALSE | Cardiac_muscle |
| CAD_1000G | LARGE       | 0.019200268 | 0.019200268 | TRUE  | Liver          |
| CAD_1000G | CD14        | 0.019568328 | 0.019568328 | FALSE | Adipose        |
| CAD_1000G | MMT00078179 | 0.019568328 | 0.019568328 | FALSE | Adipose        |
| CAD_1000G | APOA1       | 0.019986725 | 0.02402097  | TRUE  | Brain          |
| CAD_1000G | MAL         | 0.003247907 | 0.032479071 | FALSE | Blood          |
| CAD_1000G | FN1         | 0.028820454 | 0.058101858 | TRUE  | PPI            |
| CAD_1000G | TGFBI       | 0.029601491 | 0.066428856 | FALSE | PPI            |
| CAD_1000G | APOA5       | 0.022610119 | 0.070619583 | TRUE  | Brain          |
| CAD_1000G | PHACTR1     | 0.02402097  | 0.09382028  | TRUE  | Brain          |

**Supplemental Table II g. Key driver genes in CAD\_1000G\_Extend gene list.** Key driver genes with red highlight are detected in at least networks.

| CAD Gene List    | Key Drivers | P Values | FDR      | Belonging to CAD Genes | Network Sources |
|------------------|-------------|----------|----------|------------------------|-----------------|
| CAD_1000G_Extend | ATF3        | 2.26E-08 | 2.26E-07 | FALSE                  | Smooth_muscle   |
| CAD_1000G_Extend | IFI35       | 7.88E-08 | 4.44E-07 | FALSE                  | Artery          |
| CAD_1000G_Extend | DUSP1       | 8.98E-08 | 4.68E-07 | FALSE                  | Artery          |
| CAD_1000G_Extend | HLA-F       | 2.50E-07 | 7.67E-07 | FALSE                  | Artery          |
| CAD_1000G_Extend | IRF1        | 3.22E-07 | 8.39E-07 | TRUE                   | Artery          |
| CAD_1000G_Extend | DUSP5       | 5.76E-07 | 9.99E-07 | FALSE                  | Artery          |
| CAD_1000G_Extend | JUN         | 6.03E-07 | 1.03E-06 | FALSE                  | Artery          |

|                  |             |             |             |       |                      |
|------------------|-------------|-------------|-------------|-------|----------------------|
| CAD_1000G_Extend | PLAUR       | 1.06E-07    | 1.06E-06    | FALSE | Cardiac_muscle       |
| CAD_1000G_Extend | JUN         | 3.06E-07    | 1.38E-06    | FALSE | Smooth_muscle        |
| CAD_1000G_Extend | GBP2        | 4.37E-07    | 1.48E-06    | TRUE  | Smooth_muscle        |
| CAD_1000G_Extend | IRF9        | 7.44E-07    | 1.53E-06    | FALSE | Smooth_muscle        |
| CAD_1000G_Extend | SERPINE1    | 1.08E-06    | 1.55E-06    | FALSE | Artery               |
| CAD_1000G_Extend | PLAU        | 7.67E-07    | 1.56E-06    | FALSE | Smooth_muscle        |
| CAD_1000G_Extend | TAPBP       | 1.99E-07    | 1.99E-06    | FALSE | Vascular_endothelium |
| CAD_1000G_Extend | LMNA        | 4.06E-07    | 2.03E-06    | FALSE | Cardiac_muscle       |
| CAD_1000G_Extend | CCL18       | 2.44E-07    | 2.44E-06    | FALSE | Aorta                |
| CAD_1000G_Extend | CDKN1A      | 2.23E-06    | 2.79E-06    | TRUE  | Artery               |
| CAD_1000G_Extend | BGN         | 5.74E-07    | 2.87E-06    | FALSE | Aorta                |
| CAD_1000G_Extend | GRN         | 6.06E-07    | 3.03E-06    | FALSE | Vascular_endothelium |
| CAD_1000G_Extend | ICAM1       | 9.15E-07    | 3.05E-06    | TRUE  | Vascular_endothelium |
| CAD_1000G_Extend | TAPBP       | 2.36E-06    | 3.49E-06    | FALSE | Smooth_muscle        |
| CAD_1000G_Extend | RELA        | 2.64E-06    | 3.69E-06    | TRUE  | Smooth_muscle        |
| CAD_1000G_Extend | DUSP6       | 2.95E-06    | 3.86E-06    | FALSE | Smooth_muscle        |
| CAD_1000G_Extend | IFI30       | 3.85E-06    | 4.27E-06    | FALSE | Smooth_muscle        |
| CAD_1000G_Extend | OASL        | 4.12E-06    | 4.58E-06    | TRUE  | Artery               |
| CAD_1000G_Extend | CTGF        | 1.77E-06    | 4.80E-06    | FALSE | Aorta                |
| CAD_1000G_Extend | BST2        | 5.07E-06    | 5.07E-06    | FALSE | Artery               |
| CAD_1000G_Extend | ITGB4       | 1.96E-06    | 5.18E-06    | FALSE | Aorta                |
| CAD_1000G_Extend | MPRIP       | 2.98E-06    | 8.19E-06    | FALSE | Cardiac_muscle       |
| CAD_1000G_Extend | TNFAIP2     | 3.35E-06    | 8.83E-06    | FALSE | Cardiac_muscle       |
| CAD_1000G_Extend | ZYX         | 1.10E-05    | 1.10E-05    | FALSE | Smooth_muscle        |
| CAD_1000G_Extend | GAA         | 5.78E-06    | 1.16E-05    | FALSE | Aorta                |
| CAD_1000G_Extend | RARRES3     | 5.07E-06    | 1.27E-05    | FALSE | Vascular_endothelium |
| CAD_1000G_Extend | ELL2        | 7.60E-06    | 1.27E-05    | FALSE | Aorta                |
| CAD_1000G_Extend | IFNAR1      | 9.23E-06    | 1.32E-05    | FALSE | Aorta                |
| CAD_1000G_Extend | ITPKC       | 1.12E-05    | 1.40E-05    | FALSE | Aorta                |
| CAD_1000G_Extend | NOS3        | 1.49E-05    | 1.51E-05    | TRUE  | Aorta                |
| CAD_1000G_Extend | GRK5        | 7.59E-06    | 1.52E-05    | FALSE | Cardiac_muscle       |
| CAD_1000G_Extend | PTRF        | 3.34E-05    | 4.55E-05    | FALSE | Cardiac_muscle       |
| CAD_1000G_Extend | CCND1       | 3.43E-05    | 4.61E-05    | FALSE | Cardiac_muscle       |
| CAD_1000G_Extend | ISG15       | 3.72E-05    | 4.80E-05    | FALSE | Cardiac_muscle       |
| CAD_1000G_Extend | IFI27       | 2.74E-05    | 5.47E-05    | FALSE | Vascular_endothelium |
| CAD_1000G_Extend | ANXA2       | 4.94E-05    | 5.49E-05    | FALSE | Cardiac_muscle       |
| CAD_1000G_Extend | SH2B3       | 3.94E-05    | 6.56E-05    | TRUE  | Vascular_endothelium |
| CAD_1000G_Extend | DUSP6       | 4.64E-05    | 6.63E-05    | FALSE | Vascular_endothelium |
| CAD_1000G_Extend | CTSS        | 6.64E-05    | 6.64E-05    | TRUE  | Cardiac_muscle       |
| CAD_1000G_Extend | IRF7        | 0.000102682 | 0.000128352 | FALSE | Vascular_endothelium |
| CAD_1000G_Extend | GBP1        | 0.00014387  | 0.000159856 | TRUE  | Vascular_endothelium |
| CAD_1000G_Extend | DENND5A     | 0.00016117  | 0.00016117  | TRUE  | Vascular_endothelium |
| CAD_1000G_Extend | PHLDB1      | 7.48E-05    | 0.000376455 | FALSE | Liver                |
| CAD_1000G_Extend | CXCL10      | 7.54E-05    | 0.000379027 | FALSE | Liver                |
| CAD_1000G_Extend | MMT00021022 | 0.000279155 | 0.001395777 | FALSE | Heart                |
| CAD_1000G_Extend | RIF1        | 0.000279155 | 0.001395777 | FALSE | Heart                |
| CAD_1000G_Extend | NGRN        | 0.000529759 | 0.001765864 | FALSE | Liver                |
| CAD_1000G_Extend | KNG1        | 0.000207241 | 0.002072412 | FALSE | Brain                |
| CAD_1000G_Extend | MSN         | 0.00085342  | 0.00213355  | FALSE | Liver                |
| CAD_1000G_Extend | APOA1       | 0.000253583 | 0.002535826 | TRUE  | Adipose              |
| CAD_1000G_Extend | HLA-DPB1    | 1.51E-05    | 0.003307094 | FALSE | Aorta                |
| CAD_1000G_Extend | RTP4        | 0.00040671  | 0.004067102 | FALSE | Muscle               |
| CAD_1000G_Extend | COL6A3      | 0.002299741 | 0.004599482 | FALSE | Liver                |
| CAD_1000G_Extend | APOC2       | 0.001730135 | 0.005536128 | TRUE  | Muscle               |
| CAD_1000G_Extend | SLIT3       | 0.001958738 | 0.005670547 | TRUE  | Muscle               |
| CAD_1000G_Extend | HGD         | 0.002271992 | 0.006116079 | FALSE | Muscle               |
| CAD_1000G_Extend | ABCG5       | 0.004262699 | 0.006802628 | TRUE  | Liver                |
| CAD_1000G_Extend | MTMR11      | 0.004958303 | 0.007299947 | FALSE | Liver                |
| CAD_1000G_Extend | PLG         | 0.00223865  | 0.007497996 | TRUE  | Adipose              |
| CAD_1000G_Extend | AQP1        | 0.002251548 | 0.007532012 | FALSE | Adipose              |
| CAD_1000G_Extend | SPARC       | 0.00395128  | 0.00790256  | FALSE | Muscle               |
| CAD_1000G_Extend | NOLC1       | 0.006461142 | 0.008076427 | FALSE | Liver                |
| CAD_1000G_Extend | MMT00081256 | 0.006142554 | 0.00983798  | FALSE | Muscle               |
| CAD_1000G_Extend | HEMGN       | 0.00712113  | 0.010243765 | TRUE  | Muscle               |
| CAD_1000G_Extend | FBP1        | 0.009471415 | 0.010523794 | FALSE | Muscle               |
| CAD_1000G_Extend | MYOG        | 0.009471415 | 0.010523794 | FALSE | Muscle               |
| CAD_1000G_Extend | APOA1       | 0.003226995 | 0.010756649 | TRUE  | Brain                |
| CAD_1000G_Extend | AW475929    | 0.003226995 | 0.010756649 | FALSE | Brain                |
| CAD_1000G_Extend | CD274       | 0.010760451 | 0.011956056 | FALSE | Liver                |
| CAD_1000G_Extend | APOF        | 0.012403157 | 0.012403157 | FALSE | Muscle               |
| CAD_1000G_Extend | INSIG1      | 0.014306442 | 0.014306442 | FALSE | Liver                |
| CAD_1000G_Extend | THADA       | 0.007020688 | 0.015762868 | TRUE  | Brain                |
| CAD_1000G_Extend | CFB         | 0.008130205 | 0.016432124 | FALSE | Brain                |
| CAD_1000G_Extend | HLA-DQA1    | 0.012575643 | 0.017490753 | FALSE | Brain                |







Part 2:

| Key Drivers | Z-Scores | Meta-P values | KD CAD GWAS P Values in CARDIOGRAM | KD CAD GWAS P Values in 1000 Genomes | Score 1 | Score 2 | Score 3 | Summary Score |
|-------------|----------|---------------|------------------------------------|--------------------------------------|---------|---------|---------|---------------|
| DUSP6       | 10.95    | 1.35E-34      | 7.29E-02                           | 1.47E-03                             | 1.00    | 0.54    | 1.00    | 2.54          |
| DUSP1       | 9.64     | 2.77E-26      | 3.87E-03                           | 2.07E-03                             | 0.99    | 0.43    | 0.93    | 2.35          |
| KNG1        | 8.26     | 8.60E-15      | 5.08E-03                           | 2.65E-03                             | 0.99    | 0.70    | 0.24    | 1.92          |
| COL6A3      | 7.92     | 6.27E-14      | 1.08E-02                           | 2.68E-04                             | 0.98    | 0.09    | 0.59    | 1.67          |
| F2          | 7.99     | 4.22E-13      | 2.04E-01                           | 2.62E-04                             | 0.97    | 0.92    | 0.23    | 2.13          |
| APOA1       | 7.76     | 1.93E-09      | 8.02E-10                           | 5.60E-05                             | 0.96    | 0.62    | 0.15    | 1.74          |
| HGD         | 7.46     | 1.05E-08      | 6.66E-02                           | 4.15E-03                             | 0.96    | 0.92    | 0.62    | 2.50          |
| HLA-F       | 6.83     | 1.52E-08      | 2.83E-05                           | 3.02E-03                             | 0.95    | 0.12    | 0.85    | 1.91          |
| GBP1        | 7.09     | 3.41E-08      | 6.74E-03                           | 6.76E-04                             | 0.94    | 0.23    | 0.96    | 2.13          |
| LUM         | 7.05     | 5.74E-08      | 7.08E-02                           | 2.33E-02                             | 0.93    | 0.92    | 0.98    | 2.84          |
| JAG1        | 6.87     | 9.49E-08      | 2.45E-03                           | 8.01E-03                             | 0.93    | 0.27    | 0.74    | 1.93          |
| GBP2        | 6.94     | 1.60E-07      | 6.14E-03                           | 6.76E-04                             | 0.92    | 0.70    | 0.72    | 2.34          |
| MTMR11      | 6.91     | 8.93E-07      | 1.67E-03                           | 1.43E-02                             | 0.91    | 0.92    | 0.49    | 2.32          |
| ANXA1       | 6.72     | 9.70E-07      | 3.52E-03                           | 9.12E-03                             | 0.91    | 0.15    | 0.83    | 1.88          |
| MMP9        | 6.96     | 9.76E-07      | 1.95E-04                           | 5.81E-05                             | 0.90    | 0.21    | 0.87    | 1.98          |
| NM_009245   | 6.74     | 1.33E-06      | 1.00E+00                           | 1.00E+00                             | 0.89    | 0.54    | 0.20    | 1.62          |
| IFI35       | 6.43     | 1.33E-06      | 6.95E-02                           | 1.84E-03                             | 0.89    | 0.16    | 0.96    | 2.01          |
| CCL18       | 6.43     | 1.39E-06      | 2.15E-02                           | 6.44E-03                             | 0.88    | 0.47    | 0.95    | 2.30          |
| PLG         | 6.72     | 3.13E-06      | 5.04E-06                           | 2.88E-34                             | 0.87    | 0.58    | 0.27    | 1.72          |
| VEGFA       | 6.65     | 3.68E-06      | 9.02E-03                           | 1.50E-05                             | 0.86    | 0.43    | 0.38    | 1.67          |
| COL4A2      | 6.94     | 4.04E-06      | 9.09E-08                           | 1.83E-10                             | 0.86    | 0.58    | 0.69    | 2.13          |
| COL1A1      | 6.69     | 4.13E-06      | 1.06E-03                           | 2.64E-03                             | 0.85    | 0.92    | 0.82    | 2.59          |
| ITGB4       | 6.36     | 4.35E-06      | 3.16E-02                           | 3.37E-05                             | 0.84    | 0.47    | 0.61    | 1.92          |
| MMT00019644 | 6.63     | 4.58E-06      | 1.00E+00                           | 1.00E+00                             | 0.83    | 0.27    | 0.38    | 1.48          |
| MSN         | 6.47     | 7.30E-06      | 1.00E+00                           | 1.00E+00                             | 0.83    | 0.62    | 0.99    | 2.44          |
| KCNK13      | 6.43     | 1.13E-05      | 1.36E-02                           | 1.12E-02                             | 0.82    | 0.11    | 0.80    | 1.73          |
| ANXA2       | 6.50     | 1.47E-05      | 5.14E-04                           | 3.43E-03                             | 0.81    | 0.24    | 0.72    | 1.77          |
| TNFAIP2     | 6.27     | 2.20E-05      | 9.30E-04                           | 5.55E-03                             | 0.80    | 0.19    | 0.91    | 1.90          |
| CXCL12      | 6.61     | 2.28E-05      | 2.62E-02                           | 2.95E-10                             | 0.80    | 0.92    | 0.65    | 2.37          |
| ABCG5       | 6.35     | 3.70E-05      | 2.15E-06                           | 1.35E-07                             | 0.79    | 0.62    | 0.34    | 1.75          |
| CFB         | 6.42     | 4.35E-05      | 9.12E-04                           | 1.67E-03                             | 0.78    | 0.92    | 0.28    | 1.99          |
| APOC2       | 6.43     | 4.38E-05      | 2.14E-04                           | 7.07E-11                             | 0.78    | 0.92    | 0.25    | 1.94          |
| APOB        | 6.44     | 6.48E-05      | 2.49E-04                           | 3.09E-08                             | 0.77    | 0.50    | 0.54    | 1.81          |
| SORL1       | 6.19     | 6.66E-05      | 1.34E-02                           | 1.00E-02                             | 0.76    | 0.31    | 0.41    | 1.48          |
| ACVR1C      | 6.26     | 6.98E-05      | 2.19E-03                           | 3.05E-04                             | 0.75    | 0.07    | 0.19    | 1.01          |
| ADM         | 6.17     | 7.95E-05      | 3.66E-03                           | 2.77E-04                             | 0.75    | 0.14    | 0.91    | 1.79          |
| RDH16       | 6.29     | 0.000115      | 3.07E-02                           | 3.17E-03                             | 0.74    | 0.92    | 0.29    | 1.95          |
| PAPSS2      | 6.20     | 0.000136      | 6.32E-03                           | 4.68E-03                             | 0.73    | 0.47    | 0.70    | 1.91          |
| LOXL2       | 6.29     | 0.000168      | 1.12E-02                           | 5.28E-03                             | 0.72    | 0.70    | 0.64    | 2.06          |
| SLIT3       | 6.18     | 0.000204      | 8.02E-04                           | 1.83E-04                             | 0.72    | 1.00    | 0.51    | 2.22          |
| MMT00021022 | 6.11     | 0.000206      | 1.00E+00                           | 1.00E+00                             | 0.71    | 1.00    | 0.00    | 1.71          |
| TGFB1       | 6.31     | 0.000207      | 7.03E-02                           | 7.89E-03                             | 0.70    | 0.70    | 0.12    | 1.52          |
| PHACTR1     | 6.26     | 0.000221      | 6.03E-12                           | 1.81E-42                             | 0.70    | 0.58    | 0.22    | 1.50          |
| IL15RA      | 6.06     | 0.000223      | 3.36E-02                           | 2.73E-04                             | 0.69    | 0.62    | 0.43    | 1.74          |
| TRIM8       | 6.09     | 0.000224      | 6.74E-05                           | 5.08E-06                             | 0.68    | 0.43    | 0.00    | 1.11          |
| OSM         | 6.19     | 0.00024       | 2.39E-04                           | 5.36E-07                             | 0.67    | 0.70    | 0.09    | 1.47          |
| LY96        | 6.09     | 0.000257      | 3.37E-02                           | 1.02E-03                             | 0.67    | 0.36    | 0.63    | 1.66          |
| CXCL10      | 6.08     | 0.000274      | 5.74E-02                           | 6.34E-03                             | 0.66    | 0.43    | 0.97    | 2.06          |
| SLC2A3      | 6.08     | 0.000274      | 2.18E-02                           | 7.81E-03                             | 0.65    | 0.50    | 0.88    | 2.04          |
| LARGE       | 6.14     | 0.000336      | 3.02E-04                           | 4.22E-04                             | 0.64    | 0.21    | 0.39    | 1.25          |
| IRF1        | 5.93     | 0.000357      | 1.78E-03                           | 1.24E-04                             | 0.64    | 0.27    | 0.99    | 1.90          |
| AZGP1       | 6.12     | 0.000378      | 2.23E-02                           | 5.77E-05                             | 0.63    | 1.00    | 0.21    | 1.84          |
| NGRN        | 6.13     | 0.000382      | 3.16E-02                           | 3.67E-03                             | 0.62    | 0.92    | 0.16    | 1.71          |
| EFEMP1      | 6.04     | 0.000402      | 6.85E-04                           | 1.95E-03                             | 0.62    | 0.31    | 0.54    | 1.46          |
| IRF9        | 5.91     | 0.000457      | 7.65E-02                           | 3.18E-02                             | 0.61    | 0.58    | 0.77    | 1.96          |
| APOA5       | 6.10     | 0.0005        | 8.02E-10                           | 5.60E-05                             | 0.60    | 0.38    | 0.18    | 1.16          |
| CFD         | 5.90     | 0.000506      | 5.49E-02                           | 1.19E-02                             | 0.59    | 0.27    | 0.90    | 1.76          |
| NOTCH1      | 6.04     | 0.000591      | 3.08E-02                           | 1.52E-03                             | 0.59    | 0.77    | 0.44    | 1.79          |
| APOF        | 6.08     | 0.000596      | 3.42E-02                           | 4.16E-05                             | 0.58    | 1.00    | 0.30    | 1.88          |
| LDLR        | 6.06     | 0.000619      | 9.73E-10                           | 4.44E-15                             | 0.57    | 1.00    | 0.14    | 1.71          |
| KLF6        | 5.89     | 0.000632      | 2.00E-02                           | 3.53E-03                             | 0.57    | 0.05    | 0.73    | 1.35          |
| FBP1        | 6.07     | 0.000636      | 3.19E-03                           | 7.08E-04                             | 0.56    | 0.36    | 0.20    | 1.13          |
| RAC2        | 5.88     | 0.000697      | 2.04E-04                           | 2.30E-03                             | 0.55    | 0.08    | 0.86    | 1.49          |
| APOC4       | 6.05     | 0.000707      | 2.14E-04                           | 7.07E-11                             | 0.54    | 0.70    | 0.09    | 1.33          |
| MATN2       | 6.10     | 0.000713      | 3.07E-02                           | 3.12E-03                             | 0.54    | 0.70    | 0.14    | 1.38          |
| IFI30       | 5.87     | 0.000736      | 7.94E-04                           | 8.19E-04                             | 0.53    | 0.34    | 0.62    | 1.49          |
| WIPF1       | 5.99     | 0.000743      | 5.86E-03                           | 5.67E-05                             | 0.52    | 0.19    | 0.26    | 0.97          |
| FN1         | 6.10     | 0.000759      | 6.70E-05                           | 5.14E-07                             | 0.51    | 0.92    | 0.55    | 1.99          |
| BST2        | 5.87     | 0.000796      | 7.38E-03                           | 1.13E-02                             | 0.51    | 0.27    | 0.78    | 1.55          |
| COL5A1      | 5.97     | 0.000827      | 2.02E-02                           | 1.84E-03                             | 0.50    | 0.34    | 0.70    | 1.53          |
| EPS8        | 5.97     | 0.00087       | 2.72E-02                           | 9.44E-04                             | 0.49    | 0.19    | 0.58    | 1.26          |
| SPARC       | 6.03     | 0.000873      | 1.75E-03                           | 3.24E-03                             | 0.49    | 0.77    | 0.56    | 1.81          |
| IRF7        | 5.94     | 0.000912      | 7.72E-03                           | 8.68E-03                             | 0.48    | 0.54    | 0.79    | 1.81          |
| BATF2       | 5.96     | 0.00092       | 1.62E-01                           | 1.88E-02                             | 0.47    | 0.54    | 0.17    | 1.18          |
| ZYX         | 5.85     | 0.000991      | 1.63E-02                           | 2.04E-03                             | 0.46    | 0.43    | 0.92    | 1.81          |
| MMT00081256 | 5.95     | 0.001031      | 1.00E+00                           | 1.00E+00                             | 0.46    | 0.92    | 0.12    | 1.50          |
| HEMGN       | 5.94     | 0.001131      | 6.54E-04                           | 3.68E-03                             | 0.45    | 0.12    | 0.28    | 0.85          |
| ZNF496      | 5.84     | 0.001132      | 9.43E-03                           | 4.32E-04                             | 0.44    | 0.34    | 0.52    | 1.30          |
| AW475929    | 5.94     | 0.00115       | 1.00E+00                           | 1.00E+00                             | 0.43    | 0.19    | 0.43    | 1.05          |
| CKLF        | 5.94     | 0.00115       | 3.66E-02                           | 5.66E-03                             | 0.43    | 0.05    | 0.49    | 0.97          |
| APOC3       | 5.93     | 0.001197      | 8.02E-10                           | 5.60E-05                             | 0.42    | 0.70    | 0.07    | 1.19          |
| NCOR2       | 6.02     | 0.001216      | 1.59E-03                           | 9.27E-04                             | 0.41    | 0.92    | 0.10    | 1.44          |
| WWC2        | 5.83     | 0.001306      | 1.32E-02                           | 4.98E-04                             | 0.41    | 0.00    | 0.53    | 0.93          |
| ASAH1       | 5.92     | 0.001353      | 1.18E-02                           | 1.36E-02                             | 0.40    | 0.08    | 0.36    | 0.84          |
| ACCN1       | 5.99     | 0.001379      | 4.40E-04                           | 5.35E-04                             | 0.39    | 1.00    | 0.00    | 1.39          |
| ISG15       | 5.82     | 0.00139       | 1.27E-02                           | 3.48E-04                             | 0.38    | 0.38    | 0.84    | 1.61          |
| ADAM9       | 5.82     | 0.001451      | 4.28E-02                           | 4.45E-03                             | 0.38    | 0.70    | 0.86    | 1.94          |
| SDCBP       | 5.82     | 0.001466      | 4.09E-02                           | 1.51E-02                             | 0.37    | 0.17    | 0.80    | 1.34          |
| CD74        | 5.90     | 0.001539      | 2.64E-02                           | 3.41E-03                             | 0.36    | 0.54    | 0.75    | 1.65          |
| MCOLN1      | 5.90     | 0.001584      | 2.51E-02                           | 2.89E-03                             | 0.36    | 0.62    | 0.06    | 1.03          |
| ZBTB44      | 5.89     | 0.001603      | 1.47E-02                           | 3.93E-04                             | 0.35    | 0.92    | 0.22    | 1.50          |

|             |      |          |          |          |      |      |      |      |
|-------------|------|----------|----------|----------|------|------|------|------|
| IGFBP6      | 5.80 | 0.001759 | 2.16E-02 | 2.17E-03 | 0.34 | 0.27 | 0.59 | 1.19 |
| CTSB        | 5.80 | 0.001791 | 3.68E-04 | 3.91E-03 | 0.33 | 0.43 | 0.71 | 1.47 |
| SERPINC1    | 5.93 | 0.001813 | 4.02E-02 | 2.52E-03 | 0.33 | 0.31 | 0.11 | 0.74 |
| SLIT2       | 5.79 | 0.001946 | 1.29E-04 | 1.57E-03 | 0.32 | 0.01 | 0.83 | 1.16 |
| ABCG8       | 5.86 | 0.002066 | 2.15E-06 | 1.35E-07 | 0.31 | 0.43 | 0.57 | 1.31 |
| NME6        | 5.85 | 0.002077 | 5.21E-03 | 3.69E-04 | 0.30 | 0.77 | 0.00 | 1.07 |
| C1R         | 5.78 | 0.002115 | 1.46E-04 | 3.94E-04 | 0.30 | 0.34 | 0.75 | 1.38 |
| DPYD        | 5.77 | 0.002352 | 4.79E-03 | 1.62E-03 | 0.29 | 0.27 | 0.51 | 1.07 |
| AKO21074    | 5.83 | 0.002375 | 1.00E+00 | 1.00E+00 | 0.28 | 0.77 | 0.00 | 1.05 |
| BNIP3L      | 5.77 | 0.002409 | 4.72E-03 | 6.49E-04 | 0.28 | 0.34 | 0.64 | 1.26 |
| LAMA2       | 5.82 | 0.002643 | 1.53E-02 | 5.77E-03 | 0.27 | 0.16 | 0.46 | 0.89 |
| M93275      | 5.76 | 0.002662 | 1.00E+00 | 1.00E+00 | 0.26 | 0.77 | 0.08 | 1.11 |
| RIF1        | 5.70 | 0.002841 | 5.05E-02 | 1.56E-03 | 0.25 | 1.00 | 0.00 | 1.25 |
| ANXA3       | 5.74 | 0.00306  | 1.40E-02 | 2.15E-03 | 0.25 | 0.92 | 0.88 | 2.05 |
| TRIM22      | 5.74 | 0.003272 | 1.43E-03 | 3.40E-05 | 0.24 | 0.38 | 0.76 | 1.38 |
| SLC1A5      | 5.74 | 0.003283 | 9.83E-04 | 2.39E-04 | 0.23 | 0.40 | 0.60 | 1.23 |
| AKO07927    | 5.73 | 0.003364 | 1.00E+00 | 1.00E+00 | 0.22 | 0.70 | 0.32 | 1.24 |
| MAFF        | 5.73 | 0.00349  | 3.41E-03 | 2.58E-03 | 0.22 | 0.23 | 0.93 | 1.38 |
| STAT3       | 5.76 | 0.003503 | 4.35E-04 | 1.64E-06 | 0.21 | 1.00 | 0.81 | 2.02 |
| ITGA7       | 5.77 | 0.003714 | 5.34E-03 | 1.19E-04 | 0.20 | 0.15 | 0.33 | 0.68 |
| KL          | 5.77 | 0.003741 | 1.32E-02 | 2.82E-03 | 0.20 | 0.92 | 0.45 | 1.57 |
| CD14        | 5.77 | 0.003769 | 1.35E-02 | 2.37E-02 | 0.19 | 0.01 | 0.68 | 0.88 |
| GEM         | 5.76 | 0.004127 | 4.26E-03 | 1.82E-05 | 0.18 | 0.92 | 0.67 | 1.78 |
| ZNF467      | 5.70 | 0.004247 | 1.33E-03 | 3.76E-04 | 0.17 | 0.70 | 0.46 | 1.34 |
| SHC1        | 5.75 | 0.00426  | 6.14E-03 | 1.39E-05 | 0.17 | 0.92 | 0.94 | 2.03 |
| SMAD1       | 5.73 | 0.004323 | 1.78E-02 | 4.89E-04 | 0.16 | 0.92 | 0.36 | 1.44 |
| IGSF10      | 5.74 | 0.004506 | 1.30E-03 | 1.40E-03 | 0.15 | 0.03 | 0.66 | 0.84 |
| FBLN2       | 5.73 | 0.004689 | 1.35E-02 | 5.59E-04 | 0.14 | 0.54 | 0.41 | 1.10 |
| BTNL9       | 5.69 | 0.004803 | 2.75E-02 | 2.26E-02 | 0.14 | 0.24 | 0.35 | 0.73 |
| COASY       | 5.69 | 0.004899 | 8.84E-02 | 3.37E-06 | 0.13 | 0.50 | 0.33 | 0.96 |
| MMT00002956 | 5.68 | 0.004991 | 1.00E+00 | 1.00E+00 | 0.12 | 0.04 | 0.89 | 1.06 |
| TRAPP3      | 5.67 | 0.005347 | 1.67E-01 | 3.13E-02 | 0.12 | 0.04 | 0.37 | 0.52 |
| PTCHD1      | 5.67 | 0.005398 | 1.00E+00 | 1.00E+00 | 0.11 | 0.77 | 0.67 | 1.54 |
| THADA       | 5.67 | 0.005439 | 1.07E-03 | 9.84E-05 | 0.10 | 0.92 | 0.13 | 1.15 |
| LOXL1       | 5.67 | 0.005516 | 3.96E-04 | 2.47E-04 | 0.09 | 0.58 | 0.25 | 0.93 |
| PCOLCE2     | 5.67 | 0.005629 | 5.69E-02 | 6.24E-05 | 0.09 | 0.70 | 0.48 | 1.26 |
| CTNNA1      | 5.66 | 0.005696 | 9.41E-05 | 1.67E-02 | 0.08 | 0.92 | 0.31 | 1.31 |
| ALDOB       | 5.66 | 0.005725 | 2.81E-03 | 4.68E-03 | 0.07 | 0.43 | 0.17 | 0.67 |
| SCARA3      | 5.66 | 0.005725 | 2.56E-02 | 1.52E-03 | 0.07 | 0.10 | 0.50 | 0.67 |
| HELZ        | 5.65 | 0.006031 | 4.34E-02 | 2.34E-03 | 0.06 | 0.77 | 0.42 | 1.24 |
| VPS33A      | 5.63 | 0.007027 | 3.80E-03 | 2.15E-04 | 0.05 | 0.92 | 0.07 | 1.04 |
| PTPN11      | 5.65 | 0.007134 | 5.20E-07 | 1.47E-09 | 0.04 | 0.13 | 0.78 | 0.96 |
| TCF3        | 5.62 | 0.007515 | 1.02E-01 | 1.46E-02 | 0.04 | 0.70 | 0.47 | 1.21 |
| CYP11B1     | 5.61 | 0.007759 | 1.06E-02 | 2.99E-03 | 0.03 | 0.02 | 0.57 | 0.62 |
| COLEC12     | 5.60 | 0.008186 | 1.38E-03 | 3.25E-03 | 0.02 | 0.54 | 0.30 | 0.86 |
| BC042789    | 5.59 | 0.008305 | 1.00E+00 | 1.00E+00 | 0.01 | 0.47 | 0.00 | 0.49 |
| OAS2        | 5.59 | 0.008663 | 6.10E-05 | 1.02E-03 | 0.01 | 1.00 | 0.00 | 1.01 |
| ZDHHC17     | 5.57 | 0.009621 | 1.80E-03 | 4.50E-03 | 0.00 | 0.07 | 0.40 | 0.46 |

Note: The numbers in columns B-O (Adipose-Vascular Endothelium) represent the number of CAD gene lists for which a gene was identified as a KD using the specific network, with cells showing values >1 in red. Column "Tissue Consistency" represents how many unique networks in which a gene was identified as a KD. Column "KDA List Consistency" represents the frequency of KDs in all the 7\*14 =98 KDA results. "Z-Scores" and "Meta-P values" come from the meta-analysis of the 98 sets of KDA results. Columns "KD CAD GWAS P Values in CARDIoGRAM" and "KD CAD GWAS P Values in 1000 Genomes" annotate each KD with the most significant CAD association p values in CARDIoGRAM and CAD 1000 Genomes GWAS among all SNPs mapped to the gene, with cells highlighted in red satisfying GWAS P<10E-5. Columns "Score 1", "Score 2", and "Score 3" represent the normalized scores from KDA statistics and network consistency, CAD relevance of KD subnetworks in terms of CAD GWAS signal enrichment, and differential expression of KD subnetworks in CAD vs controls, respectively. Column "Summery score" is the sum of the three scores for each KD.

### Supplemental Table III. Subnetworks with CARDIoGRAM GWAS information.

| Key Drivers | Subnetwork Size                                                                                 | No. Genes with CAD 1000 Genomes GWAS P<0.001 in KD subnetworks                                | The percentage of Genes with CAD 1000 Genomes GWAS P<0.001 in KD subnetworks                               | Genes with CAD 1000 Genomes GWAS P<0.001 in KD subnetworks                                                                                                                                                                                                                                                                                                                                                                                                                                                                                                                                                                                                                                                                                                                                                                                                                                                                                                                                                                                                                                                                                                                                                                                                                                                                                                                                                                                                                                                                                  | P Values compared with random genes                                                                                       | P Values compared with GWAS genes                                                                               |
|-------------|-------------------------------------------------------------------------------------------------|-----------------------------------------------------------------------------------------------|------------------------------------------------------------------------------------------------------------|---------------------------------------------------------------------------------------------------------------------------------------------------------------------------------------------------------------------------------------------------------------------------------------------------------------------------------------------------------------------------------------------------------------------------------------------------------------------------------------------------------------------------------------------------------------------------------------------------------------------------------------------------------------------------------------------------------------------------------------------------------------------------------------------------------------------------------------------------------------------------------------------------------------------------------------------------------------------------------------------------------------------------------------------------------------------------------------------------------------------------------------------------------------------------------------------------------------------------------------------------------------------------------------------------------------------------------------------------------------------------------------------------------------------------------------------------------------------------------------------------------------------------------------------|---------------------------------------------------------------------------------------------------------------------------|-----------------------------------------------------------------------------------------------------------------|
| DUSP6       | Aorta (952); Artery (193); Cardiac_muscle (304); Smooth_muscle (89); Vascular_endothelium (275) | Aorta (276); Artery (69); Cardiac_muscle (102); Smooth_muscle (35); Vascular_endothelium (93) | Aorta (0.289); Artery (0.357); Cardiac_muscle (0.335); Smooth_muscle (0.393); Vascular_endothelium (0.338) | Aorta (XAF1, VAT1, SFTPC, NEUROD6, CAV2, C4BPA, DNASE1L3, TNFSF15, CD40, PLA2G4A, MUC4, IFITM3, MT1H, POPDC3, ARL4A, C3, HLA-DRA, SLAMF1, PHLDA1, SPP1, SFTPD, CTSK, PTGIR, COL4A2, BLVRA, SRD5A1, TRIM68, NFE2, TNFSF10, PDE1A, FAP, TRIM21, MEST, NEDD9, SIK3, CCDC92, MREG, SLC26A10, NCOR2, APOE, AHR, SORBS2, SH3PXD2A, MT1G, LYPD3, GIMAP6, MMP1, RAD23A, FBLN2, ELMO1, HLA-DOB, AP1G1, PTHLH, GBP2, MCL1, CXCL12, PPAP2B, COL6A3, C1RL, MTF, KCNJ13, ARHGEF16, ATP2A3, WNT2, WDR37, NPBWR2, MMP10, XYLT1, GJB3, TCEA2, VWF, KDR, LEFTY2, TPO, NCALD, FSTL3, NPTX1, GRK5, TPM3, CAMTA1, IL24, TFAP2B, IL23A, AXL, LRP1, GALNT6, MT1F, LPL, KDELR2, NID1, ABCA8, COL3A1, PECAM1, CLDN5, HAAO, CTSH, TFF3, FRY, EPS8, PDGFD, PSMD8, PLXND1, C1S, PLCH1, CELF2, BNIP3L, IFITM1, GAS6, FNBP1, CSF1, KIAA1549L, MYOF, SDC4, VAV2, ENG, GRIN1, ASIC2, P2RX4, KCNMA1, PHYHIP, PTRF, WDR82, MCC, FOXF2, ARF4, PDXK, IFITM2, CDK2AP1, CX3CL1, HLA-B, TCF7L2, COL5A2, NR2F2, ACP5, ALDH1A3, MX1, MGRN1, SLC22A4, RGS19, WT1, CRIM1, XCL2, MICAL2, ARL15, MMP2, TEK, CD38, SDC2, FST, ARHGDI, C14orf79, FNDC3B, WWC2, NEDD4, TIPARP, RAB23, CNL1, ISG20, CXCL1, HOXB2, CUBN, IRF3, LIF, KCNN3, GPR1, FSCN1, LIPG, PDE4B, TFPI, ELK3, TMEM176B, DNAJB1, ECM1, IFIT2, DNALI1, HERPUD1, CBL, PROM1, CXCL6, DDX5, KIAA1324, SLC10A1, HS3ST2, FOSB, PROCR, KCNE4, IRF1, SNRPF, DPT, ME3, SORT1, LSAMP, ARL4D, F2R, C1R, TRIM22, CDH13, CCNG2, NKG7, SCGN, PVRL2, MFAP4, PTPRS, BAGE1, FAM46A, UBA52, ANXA11, BBOX1, CDK14, ERG, PDGFRB, MAST4, MAG11, | Aorta (p<10e-16); Artery (p<10e-16); Cardiac_muscle (p<10e-16); Smooth_muscle (p<10e-16); Vascular_endothelium (p<10e-16) | Aorta (0.0455); Artery (0.0261); Cardiac_muscle (0.017); Smooth_muscle (0.00682); Vascular_endothelium (0.0227) |

|       |                                                |                                              |                                                     |                                                                                                                                                                                                                                                                                                                                                                                                                                                                                                                                                                                                                                                                                                                                                                                                                                                                                                                                                                                                                                                                                                                                                                                                                                                                                                                                                                                                                                                                                                                                                                                                                                                                                                                                                                                                                                                                                                                                                                                                                                                                                                                                                                                                                                                                                                                                                                                                                                                                                                                                                                                                                                                                                                                                                                     |                                                            |                                                         |
|-------|------------------------------------------------|----------------------------------------------|-----------------------------------------------------|---------------------------------------------------------------------------------------------------------------------------------------------------------------------------------------------------------------------------------------------------------------------------------------------------------------------------------------------------------------------------------------------------------------------------------------------------------------------------------------------------------------------------------------------------------------------------------------------------------------------------------------------------------------------------------------------------------------------------------------------------------------------------------------------------------------------------------------------------------------------------------------------------------------------------------------------------------------------------------------------------------------------------------------------------------------------------------------------------------------------------------------------------------------------------------------------------------------------------------------------------------------------------------------------------------------------------------------------------------------------------------------------------------------------------------------------------------------------------------------------------------------------------------------------------------------------------------------------------------------------------------------------------------------------------------------------------------------------------------------------------------------------------------------------------------------------------------------------------------------------------------------------------------------------------------------------------------------------------------------------------------------------------------------------------------------------------------------------------------------------------------------------------------------------------------------------------------------------------------------------------------------------------------------------------------------------------------------------------------------------------------------------------------------------------------------------------------------------------------------------------------------------------------------------------------------------------------------------------------------------------------------------------------------------------------------------------------------------------------------------------------------------|------------------------------------------------------------|---------------------------------------------------------|
|       |                                                |                                              |                                                     | <p>SLC7A7, SULF1, ABCG1, IGFBP7, CCL17, TCP11L1, ABCC3, PPIB, LILRB1, ZSCAN2, LDB2, RAB13, WWTR1, ZNF250, CABP1, EDNRA, MMP12, FTO, ADAMTS3, LOX, IL32, SPSB1, ZNF652, PRCP, ASPA, SLC4A2, CFI, ATP12A, GEM, TEAD1, GFPT2, ALAD, IL6R, FLI1, CX3CR1, TIMP3, OSMR, MERTK, SYNGR2, GRB10, CAV1, SCUBE2, CSF1R, ADAMTSL3, FOSL1, TTC39A, NAV3, LAMB2, CACNA1G, IFIT3, PLAU, FOXC1, THBS3, HLA-DQB1, CALR, TAGLN, KCN2, MAGI2, HOMER1, CELSR1, CNKSR1, RAMP2, KCNN4); Artery (VAT1, CAV2, IFITM3, FOS, C3, PHLDA1, COL4A2, TNFSF10, ZCCHC24, AHR, MMP1, GBP2, MCL1, PPAP2B, JUN, FGFR3, TMEM123, ATP2A2, GRK5, MT1F, KDELR2, COL3A1, PECAM1, FGFR1, FRY, EPS8, PLXND1, CSF1, MYOF, SDC4, P2RX4, KCNMA1, VEGFA, MAP3K5, ARF4, PDXK, IFITM2, TCF7L2, COL5A2, NR2F2, ALDH1A3, MX1, TRIB1, FNDC3B, TIPARP, CXCL1, LIF, ZFP36, FSCN1, TFF1, ELK3, RRB1, C16orf45, FOSB, GBP1, FSTL1, IGFBP7, ABCC3, CD302, HHEX, LOX, FLI1, ACTN1, TIMP3, SYNGR2, GRB10, CAV1, PLAU, TAGLN); Cardiac_muscle (CLIC4, CAV2, TNFRSF12A, FOS, RIT1, ST7, PHLDA1, COL4A2, DAZAP2, GRN, MEST, FDPS, MAPKAPK2, AHR, CPEB4, ITPR1, GBP2, MCL1, PPAP2B, JUN, PLIN2, SERINC1, GRK5, LRP1, ITGB5, NID1, TMED2, PLEC, PCDH9, FGFR1, FRY, SCP2, FN1, PLXND1, TGFB3, IFITM1, GAS6, SSBP4, CSF1, MYOF, SLP1, LSM4, ACRY, VEGFA, PPAR2, MAP3K5, ETS2, EIF5, TCF7L2, NR2F2, STEAP3, PNRC1, TRIB1, MMP2, ZEB1, COL18A1, TIPARP, ZFP36, TFPI, ADM, ELK3, ECM1, RRB1, HEG1, SERPINH1, CD163, HSD17B12, ALDH3A2, SH3BP5, F2R, GPX1, ANXA4, FSTL1, SOD2, NR4A2, LRRFIP1, GBE1, HTRA1, SLC7A7, ABCC3, PPIB, NF2, EDNRA, RGL1, SGK1, RUNX1T1, CD302, HHEX, ZBTB20, ACTN1, TIMP3, EGR2, CAV1, NPC2, UMP5, GUCY1A3, HLA-DQB1, CALR, LAMC1, TAGLN, NFIB, RAB27A); Smooth_muscle (STK17A, IFITM3, PYGL, ZCCHC24, PRNP, JUN, FGFR3, GRK5, ITGB5, PECAM1, IFITM1, MYOF, VEGFA, ARF4, TCF7L2, MX1, PNRC1, TRIB1, FNDC3B, ISG20, CXCL1, LIF, ZFP36, ELK3, OAS1, YARS, TRIM22, ZNF274, MAST4, IGFBP7, GLI3, TIMP3, EGR2, CAV1, PLAU); Vascular_endothelium (KLF4, CAV2, IFITM3, FOS, PHLDA1, COL4A2, GRN, AHR, CDKN1A, GBP2, MCL1, CTGF, JUN, CXCR4, GRK5, TANK, KDELR2, SPRED2, ITGB5, NID1, PECAM1, FGFR1, FRY, EPS8, FN1, PLXND1, C1S, BNIP3L, MYOF, SDC4, ICAM1, VEGFA, MAP3K5, ARF4, ETS2, IFITM2, TCF7L2, PON2, COL5A2, NR2F2, TRIB1, PTPRK, SH2B3, FNDC3B, ISG20, CXCL1, ATP2B1, PALLD, LIF, ZFP36, TFPI, ADM, ELK3, EPHA2, IL15RA, PROCR, IRF1, CD163, GBP1, F2R, C1R, CCNG2, TES, DENND5A, SP100, ANXA4, EDN1, NR4A2, ITGA2, LRRFIP1, HTRA1, IGFBP7, ABCC3, PPIB, SLC20A1, WWTR1, SGK1, MAP1LC3B, HHEX, PRCP, BACH1, GEM, TRIB2, ACTN1, TIMP3, CAV1, NPC2, TGFB1, PLAU, SWAP70, LAMC1, TAGLN, RAB27A)</p>                                                                                                            |                                                            |                                                         |
| DUSP1 | Aorta (780); Artery (265); Smooth_muscle (263) | Aorta (243); Artery (90); Smooth_muscle (97) | Aorta (0.31); Artery (0.339); Smooth_muscle (0.368) | <p>Aorta (EMILIN1, CNTN2, CALCOCO2, GNL1, MFG8, CAV2, TNFSF15, LLGL1, IFITM3, PCSK5, GATM, ARL4A, C3, MEOX1, TNFSF10, ZCCHC24, GAB2, FAP, SIK3, NRG1, APOE, AHR, SORBS2, MMP1, MMP3, FBLN2, ELMO1, CDKN1A, CH25H, PTGER3, MBNL2, ATP11A, SPHK1, MYH11, GBP2, ACP, CTGF, GPR65, PTGDS, CXCL12, PPAP2B, COL6A3, CDKN2A, DAAM1, ADAM12, MITF, WNT2, ST5, LILRB4, GJB3, LMOD1, VWF, KDR, IFIT1, FSTL3, FPR1, AXL, ITGBL1, CPA3, BLZF1, MARCO, CHPF, RBMS1, NID1, PLN, ABCA8, STAT3, COL3A1, PECAM1, CNPPD1, AHNK2, HLA-DRB5, TLR1, FN1, RRAD, PLXND1, C1S, MAFB, BNIP3L, IFITM1, NRP1, PLK3, MNDA, SDC4, SLP1, ICAM1, STX4, RIT2, KCNMA1, FEV, PTRF, COL7A1, HLA-DQA1, HOXC4, GIMAP4, KIAA0922, PTN, MAP3K5, CCR9, ETS2, IFITM2, HLA-B, TCF7L2, OGDH, TRIM29, COL5A2, BCAR3, DOCK1, ACP5, CCPG1, TRPV4, ALDH1A3, RELB, PSG11, PIK3R3, RAF1, ARG1, LIPA, TPM1, CRIM1, NMI, MAT2A, CST7, SEC14L1, SDC2, BST1, PTCRA, FST, PRKD2, NINJ1, MMP13, TIPARP, SLC26A4, OASL, ISG20, LIF, PJA2, FHL5, PDE7B, SART1, TFPI, SEC11A, ADM, AGXT, ITGA7, ELK3, ECM1, GUCY1B3, CDK6, CADPS, MYO1A, CALCRL, SLC12A8, C16orf45, CRYBA1, IL15RA, RHOQ, PROCR, KCNE4, TBC1D2B, P2RX6, BCAR1, DPT, HIVEP2, SDC1, CER1, MYLK, TMED10, C1R, TRIM22, CDH13, COL15A1, CCNG2, MFAP4, SP100, IFIT5, ANKRD1, SEMA3C, RPS27, FSTL1, EDN1, SOD2, NR4A2, AIPL1, CGA, PDGFRB, DHX38, HTRA1, TWIST1, SMAD6, SEPT9, S100A1, PDPN, PTPRN2, ZSCAN2, FGF2, PTH1R, EDNRA, IL5, MMP12, CD302, FGF5, LOX, STXB1, HSPB7, PLEK, CTSS, PRKG1, CFI, PDLIM3, GEM, ZBTB20, ADAMTS8, RPL28, OSMR, ZFP36L2, EGR2, KLF7, WIP1, CAV1, SFTPB, KIAA0430, CSF1R, ADAMTSL3, PCOLCE, UTRN, LTBP1, LOXL1, PLEKHO2, LAMB2, GRAP, IFIT3, GUCY1A3, GJA1, RFTN1, SWAP70, HLA-DQB1, FBLN1, LAMC1, TAGLN, SLC7A5, ALOX12P2, BMP1B); Artery (STK17A, KLF4, CAV2, SMAD3, IFITM3, ZCCHC24, GAB2, GRN, SIK3, APOE, CDKN1A, ABLIM1, SPHK1, MCL1, CTGF, PPAP2B, JUN, HMGCR, CXCR4, AXL, ITGB5, RBMS1, NID1, FGFR1, FN1, RRAD, PLXND1, C1S, MAFB, TPM2, IFITM1, SDC4, ICAM1, KLF2, FKBP5, VEGFA, ETS2, IFITM2, TCF7L2, ATP1B1, TPM1, CRIM1, TRIB1, SH2B3, MAT2A, SEC14L1, LDLR, PRKD2, TIPARP, PALLD, ALDH2, TFPI, ADM, ITGA7, ELK3, ECM1, HEG1, HERPUD1, PRKCA, SAMM50, RHOQ, PROCR, NEAT1, MYLK, CYBRD1, TRIM22, COL15A1, CCNG2, IFIT5, ANXA11, SOD2, NR4A2, FGF2, SGK1, BMP2, STXB1, PFKFB3, GEM, ZBTB20, TIMP3, OSMR, ZFP36L2, GRB10, CAV1, LOXL1, PLEKHO2, LAMC1, TAGLN, SLC7A5, RAB27A); Smooth_muscle (STK17A, KLF4, SQLE, CLIC4, UBE2H, RIOK3, RIT1, CALHM2, NPC1, GDF15, PHLDA1, WEE1, YRDC, GRN, VCL, APOE, CDKN1A, LTBP3, TAGLN2, MCL1, CTGF, UBL3, JUN, UBC, SHC1, HMGCR, CAMSAP2, SPRED2, ITGB5, NID1, BNIP3L, GAS6, MYOF, SDC4, HSPA1B, BCL3, PTRF, CHST11, FKBP5, VEGFA, UCP2, MAP3K5, ETS2, IFITM2, STAT6, LRP10, TRIB1,</p> | Aorta (<10e-16); Artery (<10e-16); Smooth_muscle (<10e-16) | Aorta (0.0125); Artery (0.0318); Smooth_muscle (0.0102) |

|           |                                                      |                                                   |                                                             |                                                                                                                                                                                                                                                                                                                                                                                                                                                                                                                                                                                                                                                                                                                                                                                                                                                                                                                                                                                                          |                                                                       |                                                                 |
|-----------|------------------------------------------------------|---------------------------------------------------|-------------------------------------------------------------|----------------------------------------------------------------------------------------------------------------------------------------------------------------------------------------------------------------------------------------------------------------------------------------------------------------------------------------------------------------------------------------------------------------------------------------------------------------------------------------------------------------------------------------------------------------------------------------------------------------------------------------------------------------------------------------------------------------------------------------------------------------------------------------------------------------------------------------------------------------------------------------------------------------------------------------------------------------------------------------------------------|-----------------------------------------------------------------------|-----------------------------------------------------------------|
|           |                                                      |                                                   |                                                             | JOSD1, MICAL2, FKBP1A, LDLR, CHP1, NEDD4, TIPARP, ATP2B1, ALDH2, ZFP36, ADM, DNAJB1, EPHA2, TUFT1, RRBP1, HERPUD1, RHOQ, CSTB, FOSB, PROCR, IRF1, TBC1D2B, ZNF274, RORA, DKK1, ANXA11, SOD2, NR4A2, ODC1, SMAD6, TMED5, FGF2, SGK1, BMP2, AKR1C1, GLI3, GEM, IL6R, RPL28, ZFP36L2, GRB10, CAV1, XBP1, NPC2, LTBP1, PLEKHO2, SLC7A5, KLC1, QSOX1, RAB27A)                                                                                                                                                                                                                                                                                                                                                                                                                                                                                                                                                                                                                                                 |                                                                       |                                                                 |
| KNG1      | Brain (56); Muscle (29)                              | Brain (14); Muscle (13)                           | Brain (0.25); Muscle (0.448)                                | Brain (C4BPA, APOC4, APOC3, APOB, APOA5, AZGP1, APOA4, AGXT, MAT1A, PAH, APOC2, CYP2A13, APOA1, FBP1); Muscle (APOC1, SEC14L4, APOC3, MBL1P, PFKL, APOB, APOA5, NIPSNAP1, CALN1, ITH4, MST1, CFI, APOA1)                                                                                                                                                                                                                                                                                                                                                                                                                                                                                                                                                                                                                                                                                                                                                                                                 | Brain (p<10e-16); Muscle (p<10e-16)                                   | Brain (0.017); Muscle (0.00341)                                 |
| COL6A3    | Liver (69)                                           | Liver (21)                                        | Liver (0.304)                                               | Liver (COL4A2, CXCL12, COL6A3, LARGE, BICC1, PSRC1, ITGBL1, NID1, COL3A1, GATA6, CRISPLD2, COL4A1, WT1, SERPINH1, DPT, FSTL1, PDGFRB, SMOC2, HTRA1, CX3CR1, PCOLCE)                                                                                                                                                                                                                                                                                                                                                                                                                                                                                                                                                                                                                                                                                                                                                                                                                                      | Liver (p<10e-16)                                                      | Liver (0.0386)                                                  |
| F2        | Adipose (49); Muscle (47)                            | Adipose (12); Muscle (19)                         | Adipose (0.244); Muscle (0.404)                             | Adipose (PLG, SERPIND1, SEC14L2, APOC3, APOA5, APOA4, APOF, LIPC, PAH, AKR1C1, APOA1, F2); Muscle (PLG, SERPIND1, HPX, APOC3, ATP2A2, KLKB1, UPB1, TNNT1, APOA5, MYL2, ARG1, ASGR1, GNMT, MAT1A, PAH, AKR1C1, CFI, APOA1, F2)                                                                                                                                                                                                                                                                                                                                                                                                                                                                                                                                                                                                                                                                                                                                                                            | Adipose (p<10e-16); Muscle (p<10e-16)                                 | Adipose (0.0182); Muscle (0.00114)                              |
| APOA1     | Adipose (32); Brain (30); Muscle (16)                | Adipose (9); Brain (8); Muscle (7)                | Adipose (0.281); Brain (0.266); Muscle (0.437)              | Adipose (PLG, SLC22A1, APOB, APOA4, FABP2, MAT1A, CYP2C18, APOA1, F2); Brain (APOC4, SLC22A1, APOC3, CEP97, KIAA0922, APOA4, CPS1, APOA1); Muscle (C4BPA, SERPIND1, APOC3, C8G, APOA4, APOA1, F2)                                                                                                                                                                                                                                                                                                                                                                                                                                                                                                                                                                                                                                                                                                                                                                                                        | Adipose (p<10e-16); Brain (p<10e-16); Muscle (p<10e-16)               | Adipose (0.00455); Brain (0.0136); Muscle (0.00909)             |
| HGD       | Brain (40); Muscle (48)                              | Brain (8); Muscle (12)                            | Brain (0.2); Muscle (0.25)                                  | Brain (PLG, APOC4, HPX, APOA5, APOF, PAH, AKR1D1, APOA1); Muscle (PLG, APOC4, CA5A, UROC1, APOC3, UPB1, APOB, APOA5, AGXT, MAT1A, CYP2A13, FBP1)                                                                                                                                                                                                                                                                                                                                                                                                                                                                                                                                                                                                                                                                                                                                                                                                                                                         | Brain (p<10e-16); Muscle (p<10e-16)                                   | Brain (0.00114); Muscle (0.0136)                                |
| HLA-F     | Artery (189)                                         | Artery (58)                                       | Artery (0.306)                                              | Artery (XAF1, ADAR, RIT1, C3, DPYSL2, TNFSF10, NLRCS, GRN, TSPAN3, GBP2, TREX1, MT1F, PLEC, CELF2, IFITM1, UCP2, PHF11, IFITM2, LRP10, HLA-B, ACP5, RELB, RGS19, OPTN, NMI, HLA-C, CAPG, OASL, ISG20, ALDH2, ELK3, OAS1, MMP14, CSTB, IRF1, GBP1, IFIH1, GPX1, C1R, TRIM22, UBA7, SP100, IFIT5, ANXA4, HERC6, HTRA1, ISG15, GBP3, HLA-DRB1, IL32, CTSS, IFI30, SYNGR2, OAZ1, PARP12, IFIT3, HLA-DQB1, CALR)                                                                                                                                                                                                                                                                                                                                                                                                                                                                                                                                                                                              | Artery (p<10e-16)                                                     | Artery (0.0318)                                                 |
| GBP1      | Adipose (25); Blood (18); Vascular_endothelium (216) | Adipose (7); Blood (3); Vascular_endothelium (68) | Adipose (0.28); Blood (0.166); Vascular_endothelium (0.314) | Adipose (GBP2, NMI, EXTL2, GBP1, IFIH1, TRIM22, MTTP); Blood (P2RY14, GBP1, TRIM22); Vascular_endothelium (STK17A, KLF4, XAF1, ADAR, CAV2, MT1H, ATP1B3, HLA-DRA, PHLD1A, TNFSF10, CDKN1A, GBP2, PRNP, CTGF, DDX58, HLA-DPB1, IFIT1, CXCR4, TAP2, RBMS1, IFITM1, ICAM1, IFITM2, HLA-B, SMOC4, COL4A1, MX1, LIPA, NMI, ARHGDI, FNDC3B, HLA-C, ISG20, PDE4B, ADM, IFIT2, PML, OAS1, IL15RA, IRF1, GBP1, TRIM22, SP100, IFIT5, ANXA4, EDN1, CMPK2, ISG15, GBP3, WWTR1, RGL1, LOX, IL32, PLEK, NRP2, CTSS, IFI30, ZFP36L2, CAV1, BAZ1A, MCM6, PARP12, TLR2, IFIT3, PLAU, HLA-DQB1, TAGLN, APOL3)                                                                                                                                                                                                                                                                                                                                                                                                             | Adipose (p<10e-16); Blood (p<10e-16); Vascular_endothelium (p<10e-16) | Adipose (0.0193); Blood (0.0307); Vascular_endothelium (0.0182) |
| LUM       | Brain (45)                                           | Brain (12)                                        | Brain (0.266)                                               | Brain (CXCL12, COL3A1, TGFB3, BMP6, FIBIN, TFPI, GBP1, ANXA4, SMOC2, SPOCK3, PCOLCE, ZFPM2)                                                                                                                                                                                                                                                                                                                                                                                                                                                                                                                                                                                                                                                                                                                                                                                                                                                                                                              | Brain (p<10e-16)                                                      | Brain (0.00114)                                                 |
| JAG1      | Vascular_endothelium (109)                           | Vascular_endothelium (39)                         | Vascular_endothelium (0.357)                                | Vascular_endothelium (KLF4, SMAD3, PHLD1A, COL4A2, F2RL1, PRNP, CTGF, JUN, AMIGO2, FGFR1, FN1, MYOF, ENG, VEGFA, TCF7L2, EN1, COL4A1, CRIM1, FNDC3B, NOTCH3, ATP2B1, PALLD, TFPI, ADM, ABCC1, RAC1, EPHA2, HEG1, STK24, TES, WWTR1, TJP1, ZBTB20, GRB10, LOXL1, YES1, GJA1, ITGAV, PBX3)                                                                                                                                                                                                                                                                                                                                                                                                                                                                                                                                                                                                                                                                                                                 | Vascular_endothelium (p<10e-16)                                       | Vascular_endothelium (0.0159)                                   |
| GBP2      | Blood (20); Kidney (12); Smooth_muscle (45)          | Blood (3); Kidney (2); Smooth_muscle (18)         | Blood (0.15); Kidney (0.166); Smooth_muscle (0.4)           | Blood (GBP2, IRF1, FANCA); Kidney (GBP2, MTTP); Smooth_muscle (VAT1, GBP2, DDX58, SHC1, MX1, LIPA, OPTN, HLA-C, ATP2B1, SERPINB9, ADM, IRF1, GBP1, ARNTL, ANXA4, ISG15, LOX, PLAU)                                                                                                                                                                                                                                                                                                                                                                                                                                                                                                                                                                                                                                                                                                                                                                                                                       | Blood (p<10e-16); Kidney (p<10e-16); Smooth_muscle (p<10e-16)         | Blood (0.033); Kidney (0.0159); Smooth_muscle (0.00341)         |
| MTMR11    | Liver (80)                                           | Liver (25)                                        | Liver (0.312)                                               | Liver (DUSP8, ARHGAP22, ARL2BP, VCL, NRG1, SORBS2, TAGLN2, NID1, COL3A1, COL4A1, SMOX, SH2B3, ABCG5, MYO9B, FST, ARF5, HELLS, NUDT18, WFDC3, PDGFRB, SCD, SLC20A1, ST6GALNAC4, SGSM1, OTUD7B)                                                                                                                                                                                                                                                                                                                                                                                                                                                                                                                                                                                                                                                                                                                                                                                                            | Liver (p<10e-16)                                                      | Liver (0.00114)                                                 |
| ANXA1     | Artery (170); Smooth_muscle (290)                    | Artery (57); Smooth_muscle (81)                   | Artery (0.335); Smooth_muscle (0.279)                       | Artery (CLIC4, NAB1, PYGL, ATP1B3, COL4A2, AHR, HSPB8, SPHK1, TANK, PECAM1, FGFR1, PLXND1, C1S, BNIP3L, MYOF, SDC4, ENG, CDK2AP1, KRT17, ADAM17, SLC22A4, NMI, FST, ARHGDI, NEDD4, TIPARP, PALLD, FSCN1, ELK3, RRBP1, SERPINH1, NPTN, TNFAIP6, PROCR, IRF1, GBP1, VAMP8, TRIM22, CDH13, SEMA3C, GBE1, HTRA1, SEPT11, TMED5, FGF2, EFEMP2, RAB13, WWTR1, PRCP, PLEK, CTSS, CFI, ACTN1, CAV1, PDLIM4, PLAU, TAGLN); Smooth_muscle (STK17A, KLF4, RIOK3, CBR1, ARL4A, PHLD1A, CTSK, TNFSF10, TLE1, MEST, AGRN, HSPB8, SPHK1, MCL1, PRNP, CTGF, DAAM1, MITF, SHC1, FGFR3, MAN2A2, JTB, CD2AP, RGS10, SERINC1, TANK, UVRAG, BNIP3L, SLBP, HSPG2, LSM4, STAG1, ARF4, IFITM2, EIF5, ENC1, ANP32E, PLD1, ARPC3, ME1, NMI, ARHGDI, NEDD4, TIPARP, RRS2, PALLD, FSCN1, ELK3, DDX5, TRAM2, PROCR, RYBP, IRF1, EFNA1, YWHAQ, ABHD2, CDC27, GBP1, TES, DKK1, ANXA4, SEMA3C, ATP11B, GBE1, SEPT11, IGF1BP7, TMED5, FGF2, SLC20A1, PPP1R12A, CTSS, USP25, GLI3, ACTN1, MLLT3, XBP1, IFT20, NPC2, IP6K2, SWAP70, PSMD14) | Artery (p<1.0e-16); Smooth_muscle (p<1.0e-16)                         | Artery (0.0261); Smooth_muscle (0.0659)                         |
| MMP9      | PPI (31)                                             | PPI (11)                                          | PPI (0.354)                                                 | PPI (PLG, COL4A2, COL4A3, MMP10, MMP9, FN1, COL4A1, CXCL1, TFPI, COL4A4, TIMP3)                                                                                                                                                                                                                                                                                                                                                                                                                                                                                                                                                                                                                                                                                                                                                                                                                                                                                                                          | PPI (p<1.0e-16)                                                       | PPI (0.0193)                                                    |
| NM_009245 | Brain (26)                                           | Brain (9)                                         | Brain (0.346)                                               | Brain (HPX, APOC3, APOA5, AZGP1, ARG1, MAT1A, CFI, APOA1, F2)                                                                                                                                                                                                                                                                                                                                                                                                                                                                                                                                                                                                                                                                                                                                                                                                                                                                                                                                            | Brain (p<1.0e-16)                                                     | Brain (0.00682)                                                 |
| IFI35     | Artery (165)                                         | Artery (62)                                       | Artery (0.375)                                              | Artery (XAF1, ADAR, IFITM3, C3, TRAFD1, TRIM21, GRN, APOE, PTPN6, CDKN1A, GBP2, DDX58, LGALS1, IFIT1, STAT2, C1S, CELF2, IFITM1, PDXK, IFITM2, STAT6, HLA-B, ACP5, SLC35A2, COL4A1, MX1, RELB, RGS19, OPTN, NMI, HLA-C, CAPG, OASL, ISG20, IFIT2, RRBP1, PML, VAMP3, OAS1, IL15RA, IRF1, TNFAIP1, ABHD2, GBP1, ENO1, IFIH1, VAMP8, TRIM22, UBA7, SP100, ANXA4, HERC6, ISG15, HLA-DRB1, ECHDC2, PLEK, IFI30, NPC2, PLEKHO2, PARP12, IFIT3, HLA-DQB1)                                                                                                                                                                                                                                                                                                                                                                                                                                                                                                                                                      | Artery (p<1.0e-16)                                                    | Artery (0.025)                                                  |
| CCL18     | Aorta (940)                                          | Aorta (304)                                       | Aorta (0.323)                                               | Aorta (XAF1, VAT1, TOMM22, GNLY, AK1, MFGE8, CLIC4, ALOX5AP, TOX2, CAV2, APOC1, DRG2, KLRB1, PLTP, CD40, UFD1L, IFITM3, NOD1, RIN3, FOS, MT1H, HAS1, MPG, C3, SLAMF1, SPP1, COL4A2, MKNK2, BLVRA, SRD5A1, FASTK, FBN2, EIF2B3, ACTR1A, MCM3, GAB2, FAP, LRRK1, TRIM21, GRN, MEST, CLIP1, AGAP1, SH2D2A,                                                                                                                                                                                                                                                                                                                                                                                                                                                                                                                                                                                                                                                                                                  | Aorta (p<1.0e-16)                                                     | Aorta (0.00909)                                                 |

|             |                                        |                                       |                                                     |                                                                                                                                                                                                                                                                                                                                                                                                                                                                                                                                                                                                                                                                                                                                                                                                                                                                                                                                                                                                                                                                                                                                                                                                                                                                                                                                                                                                                                                                                                                                                                                                                                                                                                                                                                                                                                                                                                    |                                                     |                                                |
|-------------|----------------------------------------|---------------------------------------|-----------------------------------------------------|----------------------------------------------------------------------------------------------------------------------------------------------------------------------------------------------------------------------------------------------------------------------------------------------------------------------------------------------------------------------------------------------------------------------------------------------------------------------------------------------------------------------------------------------------------------------------------------------------------------------------------------------------------------------------------------------------------------------------------------------------------------------------------------------------------------------------------------------------------------------------------------------------------------------------------------------------------------------------------------------------------------------------------------------------------------------------------------------------------------------------------------------------------------------------------------------------------------------------------------------------------------------------------------------------------------------------------------------------------------------------------------------------------------------------------------------------------------------------------------------------------------------------------------------------------------------------------------------------------------------------------------------------------------------------------------------------------------------------------------------------------------------------------------------------------------------------------------------------------------------------------------------------|-----------------------------------------------------|------------------------------------------------|
|             |                                        |                                       |                                                     | CPVL, ACADVL, PTPN6, NCK1, RPL23A, CH25H, USP20, TAGLN2, DDAH2, GBP2, CTGF, ACAP1, GPR65, POMP, JUN, TREX1, ADAM12, MITF, LIMS2, GORASP2, APRT, AMIGO2, LGALS1, DEF6, EPB41L2, SYMPK, IFIT1, STAT2, FSTL3, ATP5G1, CXCR4, TMSB10, GRK5, ARHGAP15, SNTA1, FPR1, CACNA1C, TAP2, PIK3R1, RPS16, RBMS1, MGAT1, CTSW, SND1, CS, MT1X, SOAT1, PECAM1, FAM65B, PLEC, HAAO, CNPPD1, PSTPIP1, TLR1, SCP2, TNFSF12, FN1, PLXND1, ERAP2, CHI3L2, LTK, IFITM1, FNBP1, SERPINB7, MND4, SDC4, SLPI, ZNF217, ASIC2, P2RX4, STX4, VKORC1, DNAJC15, COL7A1, DYRK4, OLR1, CD72, HLA-DQA1, UCP2, CNPY3, TUBGCP4, SSR2, RAP1A, TPP2, NCF2, ETS2, IFITM2, PVRI, LRP10, BMPR2, IL1R2, FUT9, MYCBP2, HLA-B, OGDH, PLEKHO1, ARPC3, TRPM2, TMC6, BCAR3, ALDH1A3, RELB, MXD1, SLC39A1, LTA4H, ATP1B1, ABCA1, JOSD1, MICB, MICAL2, SH2B3, NMI, LRPAP1, FKBP1A, MMP2, CST7, NDUFAF1, AP2S1, ARHGDI, FAM134C, CHP1, RRS2, CAPG, CAMP, HEBP2, UBE2S, ISG20, CXCL1, PEMT, ADARB1, INSM1, ADM, PFKFB4, DNAJB1, ECM1, SMAD7, NDUFB6, HEG1, ACADS, PML, SERPINH1, HERPUD1, SCARB2, VAMP3, PPP2R3C, MED22, LUZP1, LMNB2, TRAM2, MMP14, CSTB, NXPE3, PROC, MAST3, SF1, TNFAIP1, CD163, DPT, OPLA, ERP29, HIVEP2, CAMK1D, TLN1, QDPR, AP4M1, GATA3, GBP1, F2R, DNMT2, PLA2G7, YARS, GPX1, CNPY2, VAMP8, TRIM22, COL15A1, UBA7, SLC1A5, NKG7, SIT1, TES, SP100, IFIT5, FAM46A, CREG1, DKK1, FAM114A1, ERG, SOD2, EIF4E2, BICD1, PTP4A3, LGALS2, NFE2L3, SP140, HTRA1, SLC7A7, SH3BP1, LBH, SMAD6, IGFBP7, TCP11L1, SCD, ISG15, COL4A4, EFEMP2, RAB13, HLA-DRB1, DARS, MFSD11, RGL1, NUP88, SGK1, MAP1LC3B, MMP12, CD302, CD70, SSR1, LOX, IL32, IGF2R, PRCP, NRP2, FES, CTSS, BLM, PFKFB3, RALGDS, P2RY13, IFI30, CORO7, RUNX3, FGF1, NEU1, TRIP10, PLEKHJ1, ACTN1, MTFR1L, HMOX2, OSMR, SYNGR2, GRHRP, C10orf10, CAV1, YIPF5, AKR1C3, FOSL1, DDT, UTRN, NPC2, CEP170, PIP4K2A, PDLIM4, P4HA1, LAMB2, LPGAT1, TAGLN, TK1, SLC7A5, KCNN4) |                                                     |                                                |
| PLG         | Adipose (46); Liver (43)               | Adipose (14); Liver (16)              | Adipose (0.304); Liver (0.372)                      | Adipose (PLG, HPX, APOC3, APOB, APOA5, AZGP1, OIT3, ASGR1, MAT1A, PAH, CYP2A13, APOA1, F2, ITIH1); Liver (PLG, SERPIND1, C3, ALDH6A1, ITIH3, LPAL2, VTN, FN1, C1S, C4B, ALDH2, APOF, CAT, HADHB, CFI, F2)                                                                                                                                                                                                                                                                                                                                                                                                                                                                                                                                                                                                                                                                                                                                                                                                                                                                                                                                                                                                                                                                                                                                                                                                                                                                                                                                                                                                                                                                                                                                                                                                                                                                                          | Adipose (p<1.0e-16); Liver (p<1.0e-16)              | Adipose (0.00909); Liver (0.00568)             |
| VEGFA       | Adipose (36)                           | Adipose (10)                          | Adipose (0.277)                                     | Adipose (SETD7, PODXL, TMEM204, AACs, MRAS, STAT5B, VEGFA, SCTR, CDH13, KLHL2)                                                                                                                                                                                                                                                                                                                                                                                                                                                                                                                                                                                                                                                                                                                                                                                                                                                                                                                                                                                                                                                                                                                                                                                                                                                                                                                                                                                                                                                                                                                                                                                                                                                                                                                                                                                                                     | Adipose (p<1.0e-16)                                 | Adipose (0.0102)                               |
| COL4A2      | Muscle (28); PPI (19)                  | Muscle (9); PPI (8)                   | Muscle (0.321428571428571); PPI (0.421052631578947) | Muscle (PLTP, COL4A2, CXCL12, COL4A1, SCARB1, COL15A1, PDGFRB, LOXL1, TP5311); PPI (BMP3, COL4A2, OSM, FBLN2, MMP9, FN1, COL4A1, FAM46A)                                                                                                                                                                                                                                                                                                                                                                                                                                                                                                                                                                                                                                                                                                                                                                                                                                                                                                                                                                                                                                                                                                                                                                                                                                                                                                                                                                                                                                                                                                                                                                                                                                                                                                                                                           | Muscle (p<1.0e-16); PPI (p<1.0e-16)                 | Muscle (0.0136); PPI (0.00568)                 |
| COL1A1      | Liver (73)                             | Liver (23)                            | Liver (0.315068493150685)                           | Liver (COL4A2, NCAM1, FBLN2, COL6A3, GINS2, TMSB10, ITGBL1, COL3A1, GAS6, COL4A1, LOXL4, WT1, SERPINH1, IGFBP2, CD163, PDGFRB, EFEMP2, MMP12, CCDC3, TREM2, EGR2, PCOLCE, LOXL1)                                                                                                                                                                                                                                                                                                                                                                                                                                                                                                                                                                                                                                                                                                                                                                                                                                                                                                                                                                                                                                                                                                                                                                                                                                                                                                                                                                                                                                                                                                                                                                                                                                                                                                                   | Liver (p<1.0e-16)                                   | Liver (0.00114)                                |
| ITGB4       | Aorta (200)                            | Aorta (63)                            | Aorta (0.315)                                       | Aorta (CLIC4, C4BPA, CYP39A1, GDF15, TIAM2, CDKN1A, TAGLN2, GBP2, ACPP, SHC1, MMP10, EVPL, ADORA2B, PLXND1, MAFB, ICAM1, P2RX4, KCNMA1, CDC37, ITGB4, ETS2, RBMS2, LRP10, HLA-B, ALDH1A3, MX1, SEMA6A, TEK, HLA-C, SIPA1L1, CAMP, OASL, SART1, ABCC1, RAC1, EPHA2, PML, BCL2L11, CALCRL, TRIM47, SIPA1, GALNT2, GBP1, TRIM22, CDH13, PVRL2, VIPR1, ERG, GPR135, CDK18, SGK1, JUP, ACTN1, SYNGR2, FER, IFIT3, RFTN1, ZNF148, TSPAN8, CALR, AP3D1, QSOX1, APOL3)                                                                                                                                                                                                                                                                                                                                                                                                                                                                                                                                                                                                                                                                                                                                                                                                                                                                                                                                                                                                                                                                                                                                                                                                                                                                                                                                                                                                                                     | Aorta (p<1.0e-16)                                   | Aorta (0.00909)                                |
| MMT00019644 | Adipose (37)                           | Adipose (13)                          | Adipose (0.351)                                     | Adipose (MST1R, GPAM, ADRA2C, AXIN2, VEGFA, DTNA, SLC2A13, MICAL3, PRKCA, PTH2, CENPA, CD320, TK1)                                                                                                                                                                                                                                                                                                                                                                                                                                                                                                                                                                                                                                                                                                                                                                                                                                                                                                                                                                                                                                                                                                                                                                                                                                                                                                                                                                                                                                                                                                                                                                                                                                                                                                                                                                                                 | Adipose (p<1.0e-16)                                 | Adipose (0.0159)                               |
| MSN         | Liver (56); Vascular_endothelium (299) | Liver (15); Vascular_endothelium (97) | Liver (0.267); Vascular_endothelium (0.324)         | Liver (MTHFD1L, PLTP, COL4A2, DPYSL2, SLC3A1, TMSB10, WIPF1, ARHGDI, RHOQ, EHD4, ST6GALNAC4, ITGAL, TEX35, TTC7B, SIPA1L3); Vascular_endothelium (VAT1, CLIC4, CAV2, TNFRSF12A, ATP1B3, COL4A2, DPYSL2, GRN, F2RL1, PODXL, TAGLN2, GBP2, PRNP, CTGF, SHC1, PLIN2, LGALS1, EPB41L2, TMSB10, AXL, ITGB5, RBMS1, NID1, STAT3, PECAM1, FGFR1, FN1, PLXND1, C1S, CELF2, TPM2, IFITM1, NRP1, MYOF, ICAM1, HSPG2, PTRF, ARF4, IFITM2, STAT6, HLA-B, COL5A2, COL4A1, MICAL2, SH2B3, NMI, FKBP1A, MMP2, COL18A1, ARHGDI, FNDC3B, HLA-C, CAPG, ISG20, CXCL1, FSCN1, TFPI, ADM, ELK3, EPHA2, HEG1, SERPINH1, TRAM2, CSTB, ASAP1, GALNT2, MYLK, GBP1, F2R, TMED10, ENO1, GPX1, C1R, TRIM22, TES, CREG1, ANXA4, SOD2, LBH, SEPT9, ISG15, WWTR1, SSR1, NRP2, CTSS, ACTN1, TIMP3, OSMR, SNX10, AKR1C3, NPC2, LTBP1, CORO1C, TGFB1, PLAU, SWAP70, LAMC1)                                                                                                                                                                                                                                                                                                                                                                                                                                                                                                                                                                                                                                                                                                                                                                                                                                                                                                                                                                                                                                                           | Liver (p<1.0e-16); Vascular_endothelium (p<1.0e-16) | Liver (0.0239); Vascular_endothelium (0.00455) |
| KCNK13      | Liver (45)                             | Liver (6)                             | Liver (0.133)                                       | Liver (PLCG1, GPR65, S1PR5, NCAPG2, LPCAT2, ABCG1)                                                                                                                                                                                                                                                                                                                                                                                                                                                                                                                                                                                                                                                                                                                                                                                                                                                                                                                                                                                                                                                                                                                                                                                                                                                                                                                                                                                                                                                                                                                                                                                                                                                                                                                                                                                                                                                 | Liver (p<1.0e-16)                                   | Liver (0.0364)                                 |
| ANXA2       | Cardiac_muscle (587); PPI (22)         | Cardiac_muscle (187); PPI (8)         | Cardiac_muscle (0.318); PPI (0.363)                 | Cardiac_muscle (SQLE, VAT1, CLIC4, ALOX5AP, CAV2, APOC1, UQCRH, SMAD3, PLTP, TNFRSF12A, IFITM3, RIT1, MT1H, CBR1, BCAM, PHLDA1, COL4A2, AQP3, PHB, ILF2, TNFSF10, GRN, SNX3, VCL, TOP1, SVIL, AGRN, CDKN1A, TSPAN3, TAGLN2, MDH1, DDAH2, MCL1, PRNP, CTGF, PPAP2B, JUN, DAAM1, UBC, SHC1, PLIN2, H2AFV, GORASP2, RPL37A, LGALS1, RHOA, TMSB10, PSMA5, STMN1, SSB, RPL31, KDELR2, DEK, RPS16, NID1, ARPC5, STAT3, RPL6, COL3A1, TIMP2, CNPPD1, CTSH, AHNAK2, FGFTR1, DLGAP4, FN1, WWOX, PLXND1, IFITM1, GAS6, SDC4, HSPA1B, STX4, RPL7A, PTRF, YBX1, THSD7A, CTTN, ARF4, ETS2, IFITM2, STAT6, LRP10, HLA-B, PAPOLA, COL4A1, PSMB3, SLC22A4, RGS19, NRAS, LIPA, TPM1, CRIM1, CERS2, MAT2A, MMP2, GRB2, C1QBP, AP2S1, ARHGDI, AP2A2, NEDD4, ATP6V0B, RRS2, UBE2S, ALDH2, ZFP36, ERCC1, ADARB1, ACOT13, SEC11A, ADM, ELK3, COMT, ACOX1, RPSA, RRBP1, SERPINH1, HERPUD1, VAMP3, SCAMP3, TRAM2, STK24, CSTB, KDELR3, TNFAIP1, ERP29, PSMG1, TMED10, ENO1, YARS, ALG5, GPX1, VAMP8, CNN3, PRKAR1A, TXNDC5, CREG1, ANXA11, ERG, JUND, ATP11B, GBE1, SEPT11, EIF6, IGFBP7, TMED5, PPIB, WWTR1, SNX1, EDNRA, SGK1,                                                                                                                                                                                                                                                                                                                                                                                                                                                                                                                                                                                                                                                                                                                                                                                           | Cardiac_muscle (p<1.0e-16); PPI (p<1.0e-16)         | Cardiac_muscle (0.0375); PPI (0.017)           |

|             |                                                             |                                                           |                                                                      |                                                                                                                                                                                                                                                                                                                                                                                                                                                                                                                                                                                                                                                                                                                                                                                                                                                                                                                                                                                                                                                                                                                                              |                                                                                    |                                                                              |
|-------------|-------------------------------------------------------------|-----------------------------------------------------------|----------------------------------------------------------------------|----------------------------------------------------------------------------------------------------------------------------------------------------------------------------------------------------------------------------------------------------------------------------------------------------------------------------------------------------------------------------------------------------------------------------------------------------------------------------------------------------------------------------------------------------------------------------------------------------------------------------------------------------------------------------------------------------------------------------------------------------------------------------------------------------------------------------------------------------------------------------------------------------------------------------------------------------------------------------------------------------------------------------------------------------------------------------------------------------------------------------------------------|------------------------------------------------------------------------------------|------------------------------------------------------------------------------|
|             |                                                             |                                                           |                                                                      | SSR1, PRCP, CTSS, TRIB2, DSTN, HBP1, RPL28, ACTN1, RPL10A, TIMP3, CGGBP1, SHMT1, MRPL18, CAV1, RELA, UTRN, NPC2, LTBP1, LOXL1, YES1, CFL1, MTAP, P4HA1, PLAU, LPGAT1, HLA-DQB1, PPIA, LAMC1, PSMD14, TK1, EIF4A1, RPL27A, RAB27A, PEPD, SNRPD2; PPI (PLG, PLA1A, PHB, CDC42, DYSE, GRB2, PRKCA, MAP3K4)                                                                                                                                                                                                                                                                                                                                                                                                                                                                                                                                                                                                                                                                                                                                                                                                                                      |                                                                                    |                                                                              |
| TNFAIP2     | Cardiac_muscle (334)                                        | Cardiac_muscle (109)                                      | Cardiac_muscle (0.326)                                               | Cardiac_muscle (SUMO1, HS2ST1, KLF4, AK1, SMAD3, IFITM3, RIN3, NPC1, GDF15, ZCCHC24, CSK, FURIN, TLE1, NLRC5, ABI1, DENND3, TOP1, CDKN1A, UBE2I, SPHK1, ITPR1, LPAR2, SHC1, BCAP29, ASL, AMIGO2, AMPD3, ZMIZ2, HIP1, FGFR1, PLXND1, FNBP1, CSF1, SDC4, ICAM1, ETS2, STAT6, LRP10, HLA-B, NR2F2, RELB, ITSN2, RGS19, RAF1, TMEM9B, TRIB1, BAG6, SACS, OPTN, PPIF, SH2B3, MYO9B, SEC14L1, COL18A1, LDLR, ARHGAP26, TIPARP, RRS2, KCNK1, CCN1, NOTCH3, RHOT1, TMEM97, ADM, DNAJB1, PML, HERPUD1, OAS1, IL15RA, BID, IRF1, ANKRD10, LPAR1, TIAM1, CTSB, COL15A1, ARHGEF2, ANXA11, SOD2, JUND, LRRFIP1, NFE2L3, ZC3H12A, SEPT9, TOR1B, WWTR1, MAP1LC3B, AP2B1, SSR1, IL32, PRCP, TRIB2, RUNX3, TRIP10, MTF2, BRCA2, SYNGR2, MDM1, MRPL18, SMG6, CORO1C, YES1, CFL1, PLAU, SWAP70, DGKG, TTC28, QSOX1, SCAMP2)                                                                                                                                                                                                                                                                                                                                     | Cardiac_muscle (<1.0e-16)                                                          | Cardiac_muscle (0.0205)                                                      |
| CXCL12      | Adipose (47); Cardiac_muscle (170); Liver (30); Muscle (36) | Adipose (10); Cardiac_muscle (54); Liver (9); Muscle (11) | Adipose (0.212); Cardiac_muscle (0.317); Liver (0.3); Muscle (0.305) | Adipose (PODXL, MMP3, CXCL12, TRERF1, KDR, SLC6A6, MRV1, KLK10, SLC22A3, RAB19); Cardiac_muscle (CAV2, PYGL, HLA-DRA, COL4A2, ZCCHC24, CTGF, CXCL12, PPAP2B, ST5, GRK5, AXL, LRP1, NID1, ZCCHC14, PECAM1, SNED1, FGFR1, EPS8, WIF1, VPS13D, PTRF, HLA-B, CRISPLD2, TMEM176A, NR2F2, COL4A1, LIPA, ZHX3, NPR1, CXCL1, SLC24A3, SFRP2, RHOQ, LPAR1, MYLK, RAB13, SGK1, CD302, FTO, PRCP, USP25, TRIB2, ZBTB20, PSD3, TIMP3, WIP1, PCOLCE, LTBP1, LAMB2, GUCY1A3, LAMC1, ANGPT1, NFIB, KLC1); Liver (PLEKHA1, CXCL12, COL6A3, SLC2A1, RERG, SLC6A6, CUX2, HSD17B12, SFTPB); Muscle (COL4A2, AHR, PODXL, CXCL12, S100Z, SCUBE3, BRPF1, RNF213, ARHGAP10, CNIH3, OR4X2)                                                                                                                                                                                                                                                                                                                                                                                                                                                                           | Adipose (<1.0e-16); Cardiac_muscle (<1.0e-16); Liver (<1.0e-16); Muscle (<1.0e-16) | Adipose (0.0534); Cardiac_muscle (0.0182); Liver (0.00341); Muscle (0.00114) |
| ABCG5       | Adipose (18); Liver (33)                                    | Adipose (5); Liver (11)                                   | Adipose (0.277); Liver (0.333)                                       | Adipose (TCF21, AZGP1, ABCG5, ABCG8, DYNC2L1); Liver (SQLE, N4BP2L1, RAPH1, CP5F4L, HAAO, SREBF1, ABCG5, ABCG8, ADARB1, ODC1, DYNC2L1)                                                                                                                                                                                                                                                                                                                                                                                                                                                                                                                                                                                                                                                                                                                                                                                                                                                                                                                                                                                                       | Adipose (<1.0e-16); Liver (<1.0e-16)                                               | Adipose (0.00455); Liver (0.00682)                                           |
| CFB         | Brain (20)                                                  | Brain (10)                                                | Brain (0.5)                                                          | Brain (PLG, APOC1, C3, APOA5, C4B, APOF, HP, CFI, APOC2, APOA1)                                                                                                                                                                                                                                                                                                                                                                                                                                                                                                                                                                                                                                                                                                                                                                                                                                                                                                                                                                                                                                                                              | Brain (<1.0e-16)                                                                   | Brain (0.00114)                                                              |
| APOC2       | Muscle (27)                                                 | Muscle (10)                                               | Muscle (0.370)                                                       | Muscle (APOC1, SLC22A1, APOC3, APOA5, AGT, CYP4F12, ARG1, ABCG5, APOF, APOC2)                                                                                                                                                                                                                                                                                                                                                                                                                                                                                                                                                                                                                                                                                                                                                                                                                                                                                                                                                                                                                                                                | Muscle (<1.0e-16)                                                                  | Muscle (0.00114)                                                             |
| APOB        | Adipose (27); PPI (18)                                      | Adipose (7); PPI (7)                                      | Adipose (0.259); PPI (0.388)                                         | Adipose (PLG, UPB1, APOB, AKR1C1, SLC26A1, AKR1D1, APOA1); PPI (APOB, LDLR, LIPC, PPIB, MTPP, APOA1, CALR)                                                                                                                                                                                                                                                                                                                                                                                                                                                                                                                                                                                                                                                                                                                                                                                                                                                                                                                                                                                                                                   | Adipose (<1.0e-16); PPI (<1.0e-16)                                                 | Adipose (0.0114); PPI (0.00795)                                              |
| SORL1       | Vascular_endothelium (85)                                   | Vascular_endothelium (25)                                 | Vascular_endothelium (0.294)                                         | Vascular_endothelium (MYO5C, ABLIM1, ITPR1, RGS10, CXCR4, CTSB, AHNAK2, FGFR1, TCF7L2, PTPRK, HNRNP1, MUT, TFPI, NUP210, SH3BP5, VAMPB, CREG1, ANXA4, LOX, TULP4, TGOLN2, TRIB2, ZBTB20, TIMP3, SLC7A5)                                                                                                                                                                                                                                                                                                                                                                                                                                                                                                                                                                                                                                                                                                                                                                                                                                                                                                                                      | Vascular_endothelium (<1.0e-16)                                                    | Vascular_endothelium (0.0148)                                                |
| ACVR1C      | Brain (37)                                                  | Brain (7)                                                 | Brain (0.189)                                                        | Brain (SYNPO2, APOE, AKAP6, PLEKHG1, ATP2B1, ACVR1C, CYP17A1)                                                                                                                                                                                                                                                                                                                                                                                                                                                                                                                                                                                                                                                                                                                                                                                                                                                                                                                                                                                                                                                                                | Brain (<1.0e-16)                                                                   | Brain (0.0420)                                                               |
| ADM         | Artery (287); Smooth_muscle (183)                           | Artery (99); Smooth_muscle (56)                           | Artery (0.344); Smooth_muscle (0.306)                                | Artery (KLF4, TOMM22, TNFRSF12A, OS9, MT1H, SPP1, ZCCHC24, MMP1, SLC35G2, CDKN1A, PDGFRA, TSPAN3, MCL1, CTGF, PLIN2, FGFR3, AMIGO2, RGS10, GRK5, AMPD3, SMPD1, STAT3, MT1X, FGFR1, EPS8, PFKL, C1S, CSF1, SDC4, ICAM1, PTRF, VEGFA, CTTN, ARF4, ETS2, LRP10, COL5A2, COL4A1, ALDH1A3, ATP1B1, TPM1, TRIB1, SH2B3, FNDC3B, ISG20, CXCL1, PALLD, ZFP36, ERCC1, TFPI, ADM, ELK3, TUFT1, SMAD7, HEG1, SERPINH1, C16orf45, CSTB, PROCR, IRF1, TNS1, TNFAIP1, SH3BP5, C1R, CDH13, DENND5A, SP100, DKK1, EDN1, HTRA1, SMAD6, IGFBP7, CENPA, FGF2, SLC20A1, WWTR1, CES2, SGK1, PFKFB3, IFI30, BACH1, GEM, NAB2, ACTN1, TIMP3, OSMR, C10orf10, GRB10, CAV1, FOSL1, LTBP1, LOXL1, IGFBP5, LAMB2, PLAU, AKR1C2, TAGLN, SLC7A5, QSOX1); Smooth_muscle (KLF4, NPC1, PITPNB, SLC35G2, CDKN1A, GBP2, MCL1, CTGF, FGFR3, AMIGO2, TMSB10, STAT3, C1S, SDC4, PPP2CB, PTRF, PPARD, CTTN, HLA-B, CRIM1, PNRC1, TRIB1, OPTN, MICAL2, PPIF, FNDC3B, NEDD4, ISG20, ALDH2, ZFP36, ADM, TUFT1, SMAD7, MICAL3, KIF14, HIVEP2, GATA3, TES, DENND5A, CREG1, SCD, SLC20A1, SGK1, AKR1C1, PFKFB3, GLI3, IFI30, BACH1, GEM, GFPT2, GRB10, CAV1, LTBP1, LAMB2, AKR1C2, NFIB) | Artery (<1.0e-16); Smooth_muscle (<1.0e-16)                                        | Artery (0.0273); Smooth_muscle (0.0273)                                      |
| RDH16       | Brain (43); Muscle (36)                                     | Brain (10); Muscle (11)                                   | Brain (0.232); Muscle (0.3056)                                       | Brain (APOC4, SLC22A1, APOC3, KLKB1, MBL1P, APOA5, APOF, PON1, AKR1C1, CFI); Muscle (PLG, SEC14L2, APOC3, HAAO, APOB, ABCG5, C8G, APOA4, GNMT, CYP2A13, F2)                                                                                                                                                                                                                                                                                                                                                                                                                                                                                                                                                                                                                                                                                                                                                                                                                                                                                                                                                                                  | Brain (<1.0e-16); Muscle (<1.0e-16)                                                | Brain (0.0273); Muscle (0.00114)                                             |
| PAPSS2      | Cardiac_muscle (263); Smooth_muscle (108)                   | Cardiac_muscle (87); Smooth_muscle (41)                   | Cardiac_muscle (0.330); Smooth_muscle (0.379)                        | Cardiac_muscle (SYT11, CAV2, HSPB6, TNFRSF12A, PYGL, RIT1, BCAM, PHLDA1, COL4A2, MAPRE2, DPYSL2, ZCCHC24, PODXL, TAGLN2, CTGF, PPAP2B, RAB5B, AMIGO2, SGPL1, PPFIA1, AXL, ITGB5, NID1, TBC1D1, HIP1, AHNAK2, FGFR1, FRY, GAS6, FNBP1, NRP1, MYOF, ENG, KIAA0922, CTTN, ARF4, PLEKHO1, BMP6, BCAR3, COL4A1, TPM1, OPTN, MICAL2, SH2B3, COL18A1, PALLD, ALDH2, GNA13, TFPI, ADM, GUCY1B3, SERPINH1, SCARB2, TRAM2, ENTPD6, SOCS5, NEAT1, TNS1, LPAR1, CNN3, DENND5A, GAB1, HTRA1, IGFBP7, TMED5, EFEMP2, CES2, SLC5A3, CD302, LOX, S1PR3, ACTN1, ZFP36L2, FAM171A1, GRB10, BAZ1A, LTBP1, YES1, TRIP6, PLAU, GJA1, SWAP70, FBLN1, ITGAV, ILF3, LAMC1, TAGLN); Smooth_muscle (TNFRSF12A, COL4A2, VCL, NCK1, CTGF, FGFR3, LGALS1, RGS10, PGPEP1, AXL, RBMS1, TIMP2, FN1, VEGFA, ARF4, RBMS2, LRP10, ENC1, PYGB, COL4A1, LTA4H, STEAP3, PTPRK, SH2B3, SEPT7, FNDC3B, RRS2, RHOQ, PROCR, KDELR3, LPAR1, SH3BP5, FSTL1, GBE1, HTRA1, SULF1, SHB, PFKFB3, CEP170, P4HA1, LAMC1)                                                                                                                                                                       | Cardiac_muscle (<1.0e-16); Smooth_muscle (<1.0e-16)                                | Cardiac_muscle (0.0182); Smooth_muscle (0.00909)                             |
| LOXL2       | Liver (28)                                                  | Liver (11)                                                | Liver (0.392)                                                        | Liver (COL4A2, PSRC1, NID1, COL3A1, ETS2, KCNJ2, COL4A1, SERPINH1, HPS1, CSTB, UNC5B)                                                                                                                                                                                                                                                                                                                                                                                                                                                                                                                                                                                                                                                                                                                                                                                                                                                                                                                                                                                                                                                        | Liver (<1.0e-16)                                                                   | Liver (0.00341)                                                              |
| SLIT3       | Muscle (28)                                                 | Muscle (11)                                               | Muscle (0.392)                                                       | Muscle (APOE, SLIT3, EPB41L2, NID1, FN1, TGFB3, DOCK1, ADM, SCAR5, PROCR, THBS3)                                                                                                                                                                                                                                                                                                                                                                                                                                                                                                                                                                                                                                                                                                                                                                                                                                                                                                                                                                                                                                                             | Muscle (<0.00114)                                                                  | Muscle (<0.00114)                                                            |
| MMT00021022 | Heart (11)                                                  | Heart (2)                                                 | Heart (0.181)                                                        | Heart (OVOL1, TCP11)                                                                                                                                                                                                                                                                                                                                                                                                                                                                                                                                                                                                                                                                                                                                                                                                                                                                                                                                                                                                                                                                                                                         | Heart (<0.00114)                                                                   | Heart (<0.00114)                                                             |

| TGFBI   | PPI (10)                  | PPI (5)                   | PPI (0.5)                    | PPI (COL4A2, COL4A3, FN1, COL4A1, COL4A4)                                                                                                                                                                                                                                                                                                                                                                                                                                                                                                                                                                                                                                                                                                                                                                                                                                                                                                                                                                                                                                                                                                                                                                                                                                                                                                                                                                                                                                                                                                                                                                                                                                                                                                                                                                                                                                                                                                                                  | PPI (p<1.0e-16)                      | PPI (0.00341)                  |
|---------|---------------------------|---------------------------|------------------------------|----------------------------------------------------------------------------------------------------------------------------------------------------------------------------------------------------------------------------------------------------------------------------------------------------------------------------------------------------------------------------------------------------------------------------------------------------------------------------------------------------------------------------------------------------------------------------------------------------------------------------------------------------------------------------------------------------------------------------------------------------------------------------------------------------------------------------------------------------------------------------------------------------------------------------------------------------------------------------------------------------------------------------------------------------------------------------------------------------------------------------------------------------------------------------------------------------------------------------------------------------------------------------------------------------------------------------------------------------------------------------------------------------------------------------------------------------------------------------------------------------------------------------------------------------------------------------------------------------------------------------------------------------------------------------------------------------------------------------------------------------------------------------------------------------------------------------------------------------------------------------------------------------------------------------------------------------------------------------|--------------------------------------|--------------------------------|
| PHACTR1 | Brain (33)                | Brain (12)                | Brain (0.363)                | Brain (DBNDD1, SMAD3, KIAA1462, DLGAP4, NKX2-6, PHYHIP, PHACTR1, PPP1R1B, KIT, NETO1, SEPT9, PTPRN2)                                                                                                                                                                                                                                                                                                                                                                                                                                                                                                                                                                                                                                                                                                                                                                                                                                                                                                                                                                                                                                                                                                                                                                                                                                                                                                                                                                                                                                                                                                                                                                                                                                                                                                                                                                                                                                                                       | Brain (p<1.0e-16)                    | Brain (0.00568)                |
| IL15RA  | Liver (20)                | Liver (8)                 | Liver (0.4)                  | Liver (SMAD3, CDKN1A, ARHGFE5, RASD1, TTF1, ADAMTS13, IL15RA, SPSP1)                                                                                                                                                                                                                                                                                                                                                                                                                                                                                                                                                                                                                                                                                                                                                                                                                                                                                                                                                                                                                                                                                                                                                                                                                                                                                                                                                                                                                                                                                                                                                                                                                                                                                                                                                                                                                                                                                                       | Liver (p<1.0e-16)                    | Liver (0.00455)                |
| TRIM8   | Smooth_muscle (67)        | Smooth_muscle (22)        | Smooth_muscle (0.328)        | Smooth_muscle (ACTR1A, CCDC92, JUN, UBE2D4, TCEA2, SMARCA2, ZNF7, UROD, UCP2, LRP10, FNDC3B, HLA-C, TUFT1, HEG1, UTP11L, KDELR3, CAPRIN2, SOD2, GLI3, CAV1, PLAU, TRIM8)                                                                                                                                                                                                                                                                                                                                                                                                                                                                                                                                                                                                                                                                                                                                                                                                                                                                                                                                                                                                                                                                                                                                                                                                                                                                                                                                                                                                                                                                                                                                                                                                                                                                                                                                                                                                   | Smooth_muscle (p<1.0e-16)            | Smooth_muscle (0.0102)         |
| OSM     | PPI (10)                  | PPI (6)                   | PPI (0.6)                    | PPI (COL4A2, OSM, COL4A3, COL4A1, COL4A4, OSMR)                                                                                                                                                                                                                                                                                                                                                                                                                                                                                                                                                                                                                                                                                                                                                                                                                                                                                                                                                                                                                                                                                                                                                                                                                                                                                                                                                                                                                                                                                                                                                                                                                                                                                                                                                                                                                                                                                                                            | PPI (p<1.0e-16)                      | PPI (0.00341)                  |
| LY96    | Vascular_endothelium (75) | Vascular_endothelium (26) | Vascular_endothelium (0.346) | Vascular_endothelium (CALHM2, C3, AHR, CPVL, CXCL12, CXCR4, PECAM1, C1S, IFITM1, PHF11, IFITM2, HLA-B, COL5A2, ISG20, TNFAIP6, CD163, GBP1, TRIM22, ANXA4, CDK14, HTRA1, LOX, IFI30, FLI1, PLAU, HLA-DQB1)                                                                                                                                                                                                                                                                                                                                                                                                                                                                                                                                                                                                                                                                                                                                                                                                                                                                                                                                                                                                                                                                                                                                                                                                                                                                                                                                                                                                                                                                                                                                                                                                                                                                                                                                                                 | Vascular_endothelium (p<1.0e-16)     | Vascular_endothelium (0.0125)  |
| CXCL10  | Liver (46)                | Liver (13)                | Liver (0.282)                | Liver (ITIH3, NRG1, IFIT1, IRG1, XCL1, RELB, MMP13, IL1RN, IFIT2, PROCR, GBP1, CMPK2, TLR2)                                                                                                                                                                                                                                                                                                                                                                                                                                                                                                                                                                                                                                                                                                                                                                                                                                                                                                                                                                                                                                                                                                                                                                                                                                                                                                                                                                                                                                                                                                                                                                                                                                                                                                                                                                                                                                                                                | Liver (p<1.0e-16)                    | Liver (0.0102)                 |
| SLC2A3  | Aorta (825)               | Aorta (272)               | Aorta (0.329)                | Aorta (CD82, KLF4, XAF1, MFG8, CLIC4, ADAR, CAV2, APOC1, DNASE1L3, IFITM3, NOD1, TNFRSF1B, TMEM121, CTNNA1, POPDC3, ATP1B3, C3, SLAMF1, SPP1, CTSK, PTGIR, COL4A2, MAPRE2, MEOX1, TNFSF10, ACTR1A, SNX3, NEDD9, NRG1, SLC26A10, AHR, MT1G, CPVL, PODXL, MMP1, MMP3, FBLN2, KIAA1462, FCGR2B, PLCG1, PTHLH, RUNX1, SIM1, SLIT3, SPHK1, NEK1, GBP2, MCL1, PRNP, CTGF, PPAP2B, COL6A3, JUN, C1RL, NAP1L1, FLT1, MYL3, GLDC, ST5, SLC05A1, AMIGO2, GABPB2, TNNI3, GALT, NFAM1, SLC4A10, IFIT1, STAT2, NPTX1, EDN2, MMP9, IL24, CLDN10, MRAS, AXL, PAPD7, CAMSAP2, NID1, RERG, MGAT1, MSI1, STAT3, H1FO, COL3A1, PECAM1, CLDN5, TIMP2, MDM4, EPS8, TLR1, RRAD, SLC1A6, C1S, CELF2, TPM2, IFITM1, NLRP3, AIDA, LILRA2, SDC4, SLPI, ENG, HSPA1B, SEMA5A, KCNMA1, PTRF, AGT, CD72, VEGFA, HLA-DQA1, THSD7A, HMG3, ETS2, IFITM2, EIF5, IL1R2, FUT9, CST6, CX3CL1, RNF19A, COL4A1, ALDH1A3, MX1, ABCA1, ARG1, LIPA, TPM1, PTPRK, MICAL2, SH2B3, ABCG5, NMI, TMED1, FKBP1A, MYO9B, CST7, SEC14L1, COL18A1, MAS1, ARHGD1B, AMPH, PIK3C2B, PRKD2, KCNA3, OBF1, GSTM5, MMP13, RRAS2, SULT4A1, DGKI, CLEC1A, ISG20, CXCL1, NOS3, RBMS3, MYO1F, CUBN, BIRC5, PJA2, ARFGEF2, PI3, FSCN1, BAZ2B, PDE4B, RASSF8, ADM, ELK3, ASB9, EPHA2, ECM1, GUCY1B3, PML, SERPINH1, HERPUD1, CALCRL, PROM1, MYH7B, DDX5, IRS1, TNFAIP6, TRAM2, IL15RA, RPP30, MMP14, MAP3K4, HS3ST2, PROCR, RYK, SPR, KDELR3, PRKAR2B, HIVEP2, LPAR1, H3F3B, KIT, SH3BP5, GBP1, PLA2G7, LPIN1, B4GALT5, C1R, UGGT1, TRIM22, CDH13, PQBP1, CNN3, TBKBP1, TES, IFIT5, ANKRD1, ANXA11, EDN1, CDK14, PDGFRB, LGALS2, ATP11B, F2RL2, VIP, SULF1, SEPT11, TWIST1, SEPT9, VPS11, ISG15, PDPN, WWTR1, RGL1, ENO2, CD302, LOX, IL32, POU5F1, MLLT11, PCSK7, SEC23B, NRP2, CTSS, CFI, GEM, RUNX3, CBS, FLI1, TREM2, TMEM50A, ACTN1, TIMP3, OSMR, MERTK, GRIK4, SNX10, GRB10, CACNB4, APOA1, FOSL1, UTRN, LTBP1, TGFBI, IGF1, DKK3, TTC39A, P4HA1, LAMB2, SOX18, IFIT3, PLAU, GUCY1A3, RFTN1, FOXC1, HLA-DQB1, SIPA1L3, TAGLN, KCNN4) | Aorta (p<1.0e-16)                    | Aorta (0.00795)                |
| LARGE   | Liver (20)                | Liver (8)                 | Liver (0.4)                  | Liver (LSM6, COL6A3, LARGE, PRKCA, RHOQ, CSGALNACT1, OCEL1, VASN)                                                                                                                                                                                                                                                                                                                                                                                                                                                                                                                                                                                                                                                                                                                                                                                                                                                                                                                                                                                                                                                                                                                                                                                                                                                                                                                                                                                                                                                                                                                                                                                                                                                                                                                                                                                                                                                                                                          | Liver (p<1.0e-16)                    | Liver (0.0193)                 |
| IRF1    | Artery (207)              | Artery (75)               | Artery (0.362)               | Artery (KLF4, ADAR, IFITM3, FOS, RIT1, MT1H, GDF15, C3, COL4A2, TNFSF10, TRIM21, DAGLB, AGRN, CDKN1A, GBP2, MCL1, DDX58, TREX1, MAP3K11, CDC42EP4, STAT3, MT1X, ELP5, FGFR1, IFITM1, ICAM1, BCL3, IFITM2, LRP10, HLA-B, PYGB, RELB, RGS19, MICB, MICAL2, SH2B3, NMI, ICAM3, HLA-C, CAPG, OASL, ISG20, CXCL1, IRF3, VASP, ADM, IFIT2, PML, IL15RA, IRF1, FAM89B, GBP1, TRIM22, ANXA4, HERC6, FAM129B, GBE1, ISG15, WWTR1, SGK1, BMP2, STX11, IFI30, RUNX3, TRIP10, ACTN1, IGF1R, PLEKHO2, PARP12, IFIT3, PLAU, HLA-DQB1, TAGLN, SLC7A5, QSOX1)                                                                                                                                                                                                                                                                                                                                                                                                                                                                                                                                                                                                                                                                                                                                                                                                                                                                                                                                                                                                                                                                                                                                                                                                                                                                                                                                                                                                                              | Artery (p<1.0e-16)                   | Artery (0.0159)                |
| AZGP1   | Adipose (23)              | Adipose (8)               | Adipose (0.347)              | Adipose (PLG, SLC22A1, UPB1, APOA5, AZGP1, ABCG5, CYP2A13, FBP1)                                                                                                                                                                                                                                                                                                                                                                                                                                                                                                                                                                                                                                                                                                                                                                                                                                                                                                                                                                                                                                                                                                                                                                                                                                                                                                                                                                                                                                                                                                                                                                                                                                                                                                                                                                                                                                                                                                           | Adipose (p<0.00114)                  | Adipose (p<0.00114)            |
| NGRN    | Liver (32)                | Liver (10)                | Liver (0.312)                | Liver (HDDC3, TRIM68, FURIN, KLHL25, RCCD1, SPC24, SLC22A3, MESDC1, APOC2, AKAP13)                                                                                                                                                                                                                                                                                                                                                                                                                                                                                                                                                                                                                                                                                                                                                                                                                                                                                                                                                                                                                                                                                                                                                                                                                                                                                                                                                                                                                                                                                                                                                                                                                                                                                                                                                                                                                                                                                         | Liver (p<1.0e-16)                    | Liver (0.00114)                |
| EFEMP1  | Cardiac_muscle (182)      | Cardiac_muscle (64)       | Cardiac_muscle (0.351)       | Cardiac_muscle (CLIC4, CAV2, SPON1, COL4A2, MEST, FBLN2, PDGFRA, LTBP3, CTGF, PPAP2B, COL6A3, AMIGO2, SLK, OBSL1, COL3A1, FGFR1, FN1, GAS6, PTRF, COL5A2, NR2F2, ATP1B1, TPM1, PTPRK, MICAL2, MMP2, NPR1, DTNA, PEMT, PALLD, ALDH2, TFPI, ADM, HEG1, SERPINH1, TRAM2, PROCR, TNS1, ALDH3A2, TMED10, MFAP4, FAM114A1, ANXA4, SEMA3C, LRRFIP1, IGF1, PPIB, EFEMP2, WWTR1, RGL1, LOX, PRCP, ACTN1, TIMP3, PCGF2, CAV1, CAMKK2, LTBP1, LOXL1, IGF1, LAMC1, PBX3, ANGPT1, TAGLN)                                                                                                                                                                                                                                                                                                                                                                                                                                                                                                                                                                                                                                                                                                                                                                                                                                                                                                                                                                                                                                                                                                                                                                                                                                                                                                                                                                                                                                                                                                | Cardiac_muscle (p<1.0e-16)           | Cardiac_muscle (0.0148)        |
| IRF9    | Smooth_muscle (104)       | Smooth_muscle (41)        | Smooth_muscle (0.394)        | Smooth_muscle (ADAR, GRN, TRIP4, PBXIP1, DDX58, ASL, IFIT1, STAT2, TMSB10, IFITM1, MYOF, RNF213, HLA-B, ARPC3, MX1, OPTN, NMI, CAPG, OASL, ISG20, ZFP36, VASP, PML, OAS1, EIF2AK2, IRF1, NEAT1, GBP1, ENO1, IFIH1, TRIM22, UBA7, SP100, IFIT5, SARS, JUND, ISG15, IL32, RELA, PARP12, IFIT3)                                                                                                                                                                                                                                                                                                                                                                                                                                                                                                                                                                                                                                                                                                                                                                                                                                                                                                                                                                                                                                                                                                                                                                                                                                                                                                                                                                                                                                                                                                                                                                                                                                                                               | Smooth_muscle (p<1.0e-16)            | Smooth_muscle (0.00568)        |
| APOA5   | Brain (32); Liver (23)    | Brain (8); Liver (6)      | Brain (0.25); Liver (0.260)  | Brain (PLG, APOC3, APOA5, PHF2, ARG1, MAT1A, AKR1C1, FBP1); Liver (SEC14L4, APOA5, APOA4, ALDH2, ABHD2, ATOH8)                                                                                                                                                                                                                                                                                                                                                                                                                                                                                                                                                                                                                                                                                                                                                                                                                                                                                                                                                                                                                                                                                                                                                                                                                                                                                                                                                                                                                                                                                                                                                                                                                                                                                                                                                                                                                                                             | Brain (p<1.0e-16); Liver (p<1.0e-16) | Brain (0.0148); Liver (0.0114) |
| CFD     | Aorta (773)               | Aorta (238)               | Aorta (0.307)                | Aorta (CRTAP, ALOX5AP, C4BPA, N4BP2L1, APOC1, MAP4, SLC6A2, PLA1A, SPON1, IFITM3, PSORS1C1, LY75, KRT5, CDX1, PLCE1, C3, SLAMF1, MBD5, ZNF423, EIF2B3, C10orf76, FAP, HECTD3, AHR, HIC1, FBLN2, PTPN6, PDGFRA, HLA-DOB, PTGER3, MBNL2, TSPAN3, CRYAB, PCLO, MYH11, GBP2, MCL1, CTGF, PTGDS, GMPPB, COL6A3, C1RL, EPHX3, RYR1, WNT2, ST5, NPWBW2, LGALS1, STOML1, LMOD1, VTN, SLC01A2, RGS10, FSTL3, NPTX1, TMSB10, MRAS, ITGBL1, MT1F, ITGB5, GPR137B, ABCA8, TMED2, TBC1D1, TUBG2, TIMP2, TFF3, ACV2A, GP2, PARP8, GREM2, C1S, MAFB, BNP13L, NAT8, NRP1,                                                                                                                                                                                                                                                                                                                                                                                                                                                                                                                                                                                                                                                                                                                                                                                                                                                                                                                                                                                                                                                                                                                                                                                                                                                                                                                                                                                                                  | Aorta (p<1.0e-16)                    | Aorta (0.0159)                 |

|             |                                         |                                        |                                               |                                                                                                                                                                                                                                                                                                                                                                                                                                                                                                                                                                                                                                                                                                                                                                                                                                                                                                                                                                                                                                                                                                                                                                                                |                                                       |                                                   |
|-------------|-----------------------------------------|----------------------------------------|-----------------------------------------------|------------------------------------------------------------------------------------------------------------------------------------------------------------------------------------------------------------------------------------------------------------------------------------------------------------------------------------------------------------------------------------------------------------------------------------------------------------------------------------------------------------------------------------------------------------------------------------------------------------------------------------------------------------------------------------------------------------------------------------------------------------------------------------------------------------------------------------------------------------------------------------------------------------------------------------------------------------------------------------------------------------------------------------------------------------------------------------------------------------------------------------------------------------------------------------------------|-------------------------------------------------------|---------------------------------------------------|
|             |                                         |                                        |                                               | AKAP7, SERPINB7, C1orf21, LEFTY1, NDUFA4L2, SDC4, ZC2HC1C, PRG4, SLC18A2, RIT2, KLF2, HCF1R1, FKBP5, HOXC4, GIMAP4, FAM46C, PREX1, PTN, NCF2, IFITM2, LRP10, AZGP1, CX3CL1, PRSS8, DMTN, PHACTR1, BMP6, COL5A2, DOCK1, CCPG1, PID1, COL4A1, RORC, RGS7, ZSWIM8, PNRC1, ATP6V0A4, ABCG5, MMP2, AEN, GDPD5, CST7, SEC14L1, BST1, ACSS3, C4B, FAM134C, FAM168A, HLA-C, GGT5, AMPD1, GALNT12, OASL, PDZRN4, ZNF34, HOXB2, ALDH2, GPR1, FSCN1, MUT, IL1RN, GABRB3, CAT, TMEM176B, ECM1, IFIT2, SMAD7, SCARB2, PROM1, THUMPD1, PSG6, MISP, SLC2A5, SLC12A8, IL15RA, LIPC, PROCR, MUC16, COLGALT2, TBC1D2B, CD163, DPT, PRKAR2B, COPB1, CHST5, LPAR1, ALDH3A2, KIT, P2RY14, C1R, CDH13, CCNG2, NKX7, ZNF521, SMYD3, CYP1A1, PDGFRB, LGALS2, HADHB, ARHGAP24, CCL17, CD226, TGDS, PDPN, PTPRN2, FGF2, EXTL1, WWTR1, ELF5, ECHDC2, CES2, EDNRA, RGL1, ATP8B4, SGK1, CD302, CNTLN, METTL21B, LOX, PLEK, MTTT, P2RY1, CFI, ALDH3A1, RYR2, ZEB2, RUNX3, VGLL3, GFPT2, FGF1, SHH, NAGLU, TREM2, FUT3, AKR1D1, GJB4, ARHGEF3, GRB10, CAV1, OTUD7B, MSRA, CSF1R, KLHL2, PCOLCE, UTRN, PLEKHO2, ADORA3, RDH14, PLAU, GJA1, RFTN1, MYCT1, PSG5, TAGLN, KLF1, IFNA17, AP3D1, ITIH1, CAB39L, RAB27A, APOL3, VAV1) |                                                       |                                                   |
| NOTCH1      | PPI (46)                                | PPI (12)                               | PPI (0.260)                                   | PPI (SMAD3, FURIN, FBXW7, LFNG, DLL1, WDR12, ADAM17, ITCH, KAT2A, CBL, KAT2B, RELA)                                                                                                                                                                                                                                                                                                                                                                                                                                                                                                                                                                                                                                                                                                                                                                                                                                                                                                                                                                                                                                                                                                            | PPI (p<1.0e-16)                                       | PPI (0.00227)                                     |
| APOF        | Muscle (45)                             | Muscle (17)                            | Muscle (0.377)                                | Muscle (PLG, APOC4, ITIH3, GLS2, APOB, APOA5, ARG1, APOF, AGXT, LIPC, ITIH4, MAT1A, PAH, PON1, CFI, APOC2, CYP2A13)                                                                                                                                                                                                                                                                                                                                                                                                                                                                                                                                                                                                                                                                                                                                                                                                                                                                                                                                                                                                                                                                            | Muscle (p<0.00114)                                    | Muscle (p<0.00114)                                |
| LDLR        | PPI (11)                                | PPI (7)                                | PPI (0.636)                                   | PPI (APOE, APOB, LRPAP1, LDLR, PCSK9, DAB1, AP1M2)                                                                                                                                                                                                                                                                                                                                                                                                                                                                                                                                                                                                                                                                                                                                                                                                                                                                                                                                                                                                                                                                                                                                             | PPI (p<0.00114)                                       | PPI (p<0.00114)                                   |
| KLF6        | Smooth_muscle (400)                     | Smooth_muscle (114)                    | Smooth_muscle (0.285)                         | Smooth_muscle (KLF4, TAB2, UBE2H, CAV2, SMAD3, TNFRSF12A, PYGL, FOS, ARL4A, PHLDA1, WEE1, SMTN, PDE8A, NEDD9, RHBDF1, CDKN1A, RUNX1, GBP2, MCL1, PRNP, CTGF, JUN, DAAM1, FGFR3, CLSTN3, WDR37, LGALS1, IFIT1, FSTL3, SERINC1, ADORA2B, RBMS1, STAT3, HEXB, FGFR1, NTAN1, FN1, TCF7L1, CH13L2, WIPF1, SREBF1, MYOF, ICAM1, HSPA1B, VEGFA, UCP2, MAP3K5, ETS2, TCF7L2, ENC1, LTA4H, ATP1B1, PNRC1, TRIB1, JOSD1, OPTN, MICB, MICAL2, SEC14L1, PRKD2, BMPR1A, TIPARP, RRAS2, ATP2B1, ALDH2, ZFP36, PUM2, ABCC1, TUFT1, RRBP1, TNFAIP6, FOSB, RYBP, ANKRD10, EFNA1, TNFAIP1, HIVEP2, TLN1, GATA3, GBP1, BMP1, LPIN1, ZNF274, TES, DENND5A, IFIT5, ANXA4, SOD2, CYP1A1, PTP4A3, LRRFIP1, SCD, SLC20A1, SGK1, LOX, AKR1C1, CTSS, GLI3, TGOLN2, GEM, PHYH, TIMP3, ZFP36L2, GRB10, AKR1C3, UTRN, NPC2, CORO1C, TGFB1, P4HA1, IFIT3, PLAU, SWAP70, QSOX1)                                                                                                                                                                                                                                                                                                                                               | Smooth_muscle (p<1.0e-16)                             | Smooth_muscle (0.0477)                            |
| FBP1        | Muscle (23)                             | Muscle (8)                             | Muscle (0.347)                                | Muscle (PLG, APOC4, SEC14L2, UROC1, APOC3, ASGR1, MAT1A, FBP1)                                                                                                                                                                                                                                                                                                                                                                                                                                                                                                                                                                                                                                                                                                                                                                                                                                                                                                                                                                                                                                                                                                                                 | Muscle (p<1.0e-16)                                    | Muscle (0.0125)                                   |
| RAC2        | Cardiac_muscle (179)                    | Cardiac_muscle (48)                    | Cardiac_muscle (0.268)                        | Cardiac_muscle (STK17A, PLTP, C3, SRRT, GRN, GBP2, CXCR4, C19orf12, FGFR1, PLXND1, CELF2, C14orf159, VPS13D, ICAM1, SSR2, MAP3K5, PVRI, HLA-B, ACP5, NCAPG2, CIAO1, ARHGDI, FNDC3B, IL1A, CAT, CDK6, SRSF2, OAS1, IL15RA, DBI, TESC, SIPA1, GBP1, CYBRD1, LRR8C, FAM46A, MXRA7, CTSS, IFI30, TGOLN2, FLI1, SYNGR2, MCM6, C1orf131, DKK3, IFIT3, PLAU, RAB27A)                                                                                                                                                                                                                                                                                                                                                                                                                                                                                                                                                                                                                                                                                                                                                                                                                                  | Cardiac_muscle (p<1.0e-16)                            | Cardiac_muscle (0.0409)                           |
| APOC4       | Brain (25)                              | Brain (10)                             | Brain (0.4)                                   | Brain (APOC1, C3, APOC4, HPX, ARG1, MAT1A, PAH, CFI, APOC2, APOA1)                                                                                                                                                                                                                                                                                                                                                                                                                                                                                                                                                                                                                                                                                                                                                                                                                                                                                                                                                                                                                                                                                                                             | Brain (p<1.0e-16)                                     | Brain (0.00341)                                   |
| MATN2       | PPI (13)                                | PPI (7)                                | PPI (0.538)                                   | PPI (COL4A2, FBN2, COL4A3, FN1, COL4A1, MATN4, COL4A4)                                                                                                                                                                                                                                                                                                                                                                                                                                                                                                                                                                                                                                                                                                                                                                                                                                                                                                                                                                                                                                                                                                                                         | PPI (p<1.0e-16)                                       | PPI (0.00341)                                     |
| IFI30       | Smooth_muscle (104)                     | Smooth_muscle (35)                     | Smooth_muscle (0.336)                         | Smooth_muscle (IFITM3, KPNA2, FGFR3, HLA-DPB1, JTB, IFIT1, SSB, C1S, UCP2, ALDH1A3, MX1, MICB, NMI, CAPG, ADM, SAMM50, RAB20, CSTB, PROCR, IRF1, VAMP8, TRIM22, ISYNA1, SP100, IFIT5, CREG1, LBH, ISG15, SGK1, IFI30, PARP12, LAMB2, IFIT3, HLA-DQB1, RAB27A)                                                                                                                                                                                                                                                                                                                                                                                                                                                                                                                                                                                                                                                                                                                                                                                                                                                                                                                                  | Smooth_muscle (p<1.0e-16)                             | Smooth_muscle (0.0136)                            |
| WIPF1       | Liver (20)                              | Liver (3)                              | Liver (0.15)                                  | Liver (WIPF1, TFPI, DOCK10)                                                                                                                                                                                                                                                                                                                                                                                                                                                                                                                                                                                                                                                                                                                                                                                                                                                                                                                                                                                                                                                                                                                                                                    | Liver (p<1.0e-16)                                     | Liver (0.0205)                                    |
| FN1         | Kidney (16); PPI (75)                   | Kidney (3); PPI (21)                   | Kidney (0.187); PPI (0.28)                    | Kidney (ERBB4, ADAM12, FN1); PPI (COL4A2, FBLN2, COL4A3, ITGB6, CXCL12, FSTL3, MMP9, GALNT6, FN1, COL7A1, COL4A1, SDC2, FST, LPA, FASLG, COL4A4, SMAD9, MEP1B, LTBP1, IGFBP5, FBLN1)                                                                                                                                                                                                                                                                                                                                                                                                                                                                                                                                                                                                                                                                                                                                                                                                                                                                                                                                                                                                           | Kidney (p<1.0e-16); PPI (p<1.0e-16)                   | Kidney (0.00114); PPI (0.0477)                    |
| BST2        | Artery (91)                             | Artery (33)                            | Artery (0.362)                                | Artery (ADAR, APOC1, IFITM3, TNFSF10, TRIM21, TAGLN2, GBP2, RGS10, EPS8, IFITM1, SDC4, ICAM1, PDXK, IFITM2, HLA-B, MX1, NMI, HLA-C, OASL, UBE2S, IFIT2, IL15RA, CSTB, GBP1, SP100, IFIT5, ISG15, IFI30, TRIB2, SYNGR2, PARP12, IFIT3, HLA-DQB1)                                                                                                                                                                                                                                                                                                                                                                                                                                                                                                                                                                                                                                                                                                                                                                                                                                                                                                                                                | Artery (p<1.0e-16)                                    | Artery (0.0159)                                   |
| COL5A1      | Adipose (29)                            | Adipose (13)                           | Adipose (0.448)                               | Adipose (COL4A2, CDKN1A, COL6A3, COL3A1, OAF, ACLY, COL5A2, COL4A1, SERPINH1, KDELR3, COL15A1, DNAH10, PLAU)                                                                                                                                                                                                                                                                                                                                                                                                                                                                                                                                                                                                                                                                                                                                                                                                                                                                                                                                                                                                                                                                                   | Adipose (p<1.0e-16)                                   | Adipose (0.0136)                                  |
| EPS8        | Liver (22)                              | Liver (7)                              | Liver (0.318)                                 | Liver (GALNS, EPS8, PTPRO, TFPI, TSPAN33, C12orf5, MMP12)                                                                                                                                                                                                                                                                                                                                                                                                                                                                                                                                                                                                                                                                                                                                                                                                                                                                                                                                                                                                                                                                                                                                      | Liver (p<1.0e-16)                                     | Liver (0.0205)                                    |
| SPARC       | Muscle (34)                             | Muscle (11)                            | Muscle (0.323)                                | Muscle (PRND, COL4A2, NEDD9, TMSB10, NID1, COL3A1, FN1, COL5A2, COL4A1, RRBP1, SERPINH1)                                                                                                                                                                                                                                                                                                                                                                                                                                                                                                                                                                                                                                                                                                                                                                                                                                                                                                                                                                                                                                                                                                       | Muscle (p<1.0e-16)                                    | Muscle (0.00227)                                  |
| IRF7        | Adipose (24); Vascular_endothelium (42) | Adipose (8); Vascular_endothelium (16) | Adipose (0.333); Vascular_endothelium (0.380) | Adipose (ADAR, DHX58, IFIT1, STAT2, MX1, OASL, OAS1, ISG15); Vascular_endothelium (XAF1, IFITM3, OAS3, IFITM1, ICAM1, IFITM2, MX1, HLA-C, ZFP36, PML, OAS1, IRF1, SP100, ISG15, RELA, IFIT3)                                                                                                                                                                                                                                                                                                                                                                                                                                                                                                                                                                                                                                                                                                                                                                                                                                                                                                                                                                                                   | Adipose (p<1.0e-16); Vascular_endothelium (p<1.0e-16) | Adipose (0.00682); Vascular_endothelium (0.00909) |
| BATF2       | Blood (12)                              | Blood (4)                              | Blood (0.333)                                 | Blood (TAP2, IL15RA, IRF1, GBP1)                                                                                                                                                                                                                                                                                                                                                                                                                                                                                                                                                                                                                                                                                                                                                                                                                                                                                                                                                                                                                                                                                                                                                               | Blood (p<1.0e-16)                                     | Blood (0.00682)                                   |
| ZYX         | Smooth_muscle (231)                     | Smooth_muscle (86)                     | Smooth_muscle (0.372)                         | Smooth_muscle (VAT1, MED15, CAV2, SMAD3, PLTP, GNB2, COL4A2, SMTN, GRN, VCL, MAPKAPK2, RHBDF1, RAD23A, AGRN, SPHK1, MCL1, PRNP, INPP5A, FGFR3, JTB, LRP1, ITGB5, RBMS1, LPP, MGAT1, STAT3, TMEM214, PLEC, TIMP2, AHNAK2, DPAGT1, FGFR1, DLGAP4, PLXND1, TPM2, ICAM1, PTRF, FAM120A, UCP2, CDC37, ITGB4, LRP10, PLEKHO1, DOCK6, FXR2, RELB, PTPRK, OPTN, CERS2, MYO9B, PLXNA1, COL18A1, PRKD2, AP2A2, FSCN1, GRINA, VASP, EPHA2, CLPTM1, IRF1, FAM89B, SUPT5H, PRKCD, SCARB1, TNFAIP1, CSPG4, GALNT2, TES, DENND5A, WBP2, PTP4A3, SMAD6, IL32, GLI3, JUP, ACTN1, RALY, CAV1, RELA, FOSL1, NPC2, TRIP6, HNRNPUL1, LAMC1, QSOX1, RAB27A)                                                                                                                                                                                                                                                                                                                                                                                                                                                                                                                                                          | Smooth_muscle (p<1.0e-16)                             | Smooth_muscle (0.0102)                            |
| MMT00081256 | Muscle (20)                             | Muscle (5)                             | Muscle (0.25)                                 | Muscle (TNFSF10, NRG1, TMEM59L, GBP1, ZEB2)                                                                                                                                                                                                                                                                                                                                                                                                                                                                                                                                                                                                                                                                                                                                                                                                                                                                                                                                                                                                                                                                                                                                                    | Muscle (p<1.0e-16)                                    | Muscle (0.00114)                                  |



|          |                      |                     |                        |                                                                                                                                                                                                                                                                                                                                                                                                                                                                                                                                                                                                                                                                                                                                                                                                                                                                                                                                                                                                                                                                                                                                                                                                                                                               |                            |                         |
|----------|----------------------|---------------------|------------------------|---------------------------------------------------------------------------------------------------------------------------------------------------------------------------------------------------------------------------------------------------------------------------------------------------------------------------------------------------------------------------------------------------------------------------------------------------------------------------------------------------------------------------------------------------------------------------------------------------------------------------------------------------------------------------------------------------------------------------------------------------------------------------------------------------------------------------------------------------------------------------------------------------------------------------------------------------------------------------------------------------------------------------------------------------------------------------------------------------------------------------------------------------------------------------------------------------------------------------------------------------------------|----------------------------|-------------------------|
| HEMGN    | Muscle (21)          | Muscle (4)          | Muscle (0.190)         | Muscle (SLPI, ITGAD, MMP13, CAMP)                                                                                                                                                                                                                                                                                                                                                                                                                                                                                                                                                                                                                                                                                                                                                                                                                                                                                                                                                                                                                                                                                                                                                                                                                             | Muscle (p<1.0e-16)         | Muscle (0.0307)         |
| ZNF496   | Liver (39)           | Liver (11)          | Liver (0.282)          | Liver (SLC29A4, RAD50, SLC22A5, RASD1, LRRC48, ZNF496, SLC22A4, SMCR8, RNF123, SHMT1, DHRS7B)                                                                                                                                                                                                                                                                                                                                                                                                                                                                                                                                                                                                                                                                                                                                                                                                                                                                                                                                                                                                                                                                                                                                                                 | Liver (p<1.0e-16)          | Liver (0.0136)          |
| AW475929 | Brain (30)           | Brain (8)           | Brain (0.266)          | Brain (KLHL10, TEX2, ACOX1, PRKCA, CRHR1, ARL4D, SLC25A39, MYL4)                                                                                                                                                                                                                                                                                                                                                                                                                                                                                                                                                                                                                                                                                                                                                                                                                                                                                                                                                                                                                                                                                                                                                                                              | Brain (p<1.0e-16)          | Brain (0.0205)          |
| CKLF     | Liver (26)           | Liver (6)           | Liver (0.230)          | Liver (LARGE, SLPI, LIPA, PRKCD, CDKN2B, PHYH)                                                                                                                                                                                                                                                                                                                                                                                                                                                                                                                                                                                                                                                                                                                                                                                                                                                                                                                                                                                                                                                                                                                                                                                                                | Liver (p<1.0e-16)          | Liver (0.0477)          |
| APOC3    | Brain (19)           | Brain (5)           | Brain (0.263)          | Brain (APOC3, UPB1, APOA5, CCDC153, APOA1)                                                                                                                                                                                                                                                                                                                                                                                                                                                                                                                                                                                                                                                                                                                                                                                                                                                                                                                                                                                                                                                                                                                                                                                                                    | Brain (p<1.0e-16)          | Brain (0.00341)         |
| NCOR2    | Kidney (12)          | Kidney (7)          | Kidney (0.583)         | Kidney (NCOR2, ACAD10, UBC, AAC5, CUX2, PTPN11, VPS33A)                                                                                                                                                                                                                                                                                                                                                                                                                                                                                                                                                                                                                                                                                                                                                                                                                                                                                                                                                                                                                                                                                                                                                                                                       | Kidney (p<1.0e-16)         | Kidney (0.00114)        |
| WWC2     | Aorta (262)          | Aorta (70)          | Aorta (0.267)          | Aorta (MCOLN3, FAIM, CAV2, ARMC8, IFITM3, C3, PHLDA1, ALDH6A1, MKNK2, PDE1A, LRRK1, AGAP1, RPL23A, PTHLH, SLC03A1, CTGF, MITF, EPHX3, AMIGO2, FSTL3, OSBP1, SLC26A2, GPR137B, DNAJC7, COL3A1, FAM96B, FN1, TGFBR3, MCC, HEXA, IFITM2, TKT, DYSF, ARG1, TPM1, PTPRK, MICAL2, FNDC3B, WWC2, PALLD, FHIT, TMEM184C, TFF1, TMEM176B, IFIT2, WDR33, PROCR, C8orf4, CDH13, CREG1, ANKRD1, ANXA4, GAB1, MAG1, DHX38, ATG4B, PEAK1, PDPN, WWTR1, ECHDC2, CABP1, GALNT15, P2RY13, ST6GALNAC5, KLF7, DKK3, LAMB2, MAGI2, DBR1, KCNN4)                                                                                                                                                                                                                                                                                                                                                                                                                                                                                                                                                                                                                                                                                                                                   | Aorta (p<1.0e-16)          | Aorta (0.0989)          |
| ASAH1    | Muscle (18)          | Muscle (4)          | Muscle (0.222)         | Muscle (COL4A2, SPY2D1, EDNRA, SGK223)                                                                                                                                                                                                                                                                                                                                                                                                                                                                                                                                                                                                                                                                                                                                                                                                                                                                                                                                                                                                                                                                                                                                                                                                                        | Muscle (p<1.0e-16)         | Muscle (0.0409)         |
| ACCN1    | Islet (13)           | Islet (4)           | Islet (0.307)          | Islet (LARGE, ACCN1, ITGA2, CYP17A1)                                                                                                                                                                                                                                                                                                                                                                                                                                                                                                                                                                                                                                                                                                                                                                                                                                                                                                                                                                                                                                                                                                                                                                                                                          | Islet (p<0.00114)          | Islet (p<0.00114)       |
| ISG15    | Cardiac_muscle (162) | Cardiac_muscle (57) | Cardiac_muscle (0.351) | Cardiac_muscle (TCP1, XAF1, ADAR, IFITM3, MPG, MKNK2, MEST, ACADVL, ABLIM1, PTHLH, DDAH2, PLIN2, TMSB10, SND1, STAT3, FGFR1, IFITM1, WBP1L, PTRF, SSR2, PHF11, IFITM2, LRP10, HLA-B, TKT, MX1, PSMB3, SH2B3, PSMC3, AP2S1, PIK3C2B, HLA-C, ATP6V0B, EREG, ISG20, HERPUD1, IL15RA, GBP1, TRIM22, UBA7, CNN3, SP100, CREG1, ANXA11, CMPK2, LRRFIP1, ODC1, TOR1B, ISG15, MAP1LC3B, IFI30, ABCB4, NPC2, CORO1C, PARP12, IFIT3, PLAU)                                                                                                                                                                                                                                                                                                                                                                                                                                                                                                                                                                                                                                                                                                                                                                                                                              | Cardiac_muscle (p<1.0e-16) | Cardiac_muscle (0.0114) |
| ADAM9    | Aorta (446)          | Aorta (153)         | Aorta (0.343)          | Aorta (EMILIN1, PITX1, CAV2, C4BPA, PYGL, DSCAM, TNFRSF1B, MT1H, HAS1, C3, SPP1, ITGB8, PIGK, COL4A2, ADORA2A, ZCCHC24, NOX4, FAP, GUCA1A, ERMAP, MMP1, MMP3, FBLN2, PDGFRA, MBNL2, TAGLN2, FKBP10, ITGB6, CTGF, PTGDS, PPAP2B, SHC1, MAP3K7CL, WNT2, HLA-DPB1, MMP10, KDR, FSTL3, IL10, GLT8D1, MT1F, KDELR2, RBMS1, NID1, PLN, ARPC5, GSTT2, MT1X, COL3A1, DPAGT1, EPS8, FN1, RRAD, TPM2, PPP2R3A, NDUFA4L2, KCNMA1, TCF21, FOXF2, KCNS3, HYAL1, STT3A, NCF2, NINJ2, AZGP1, CST6, ENC1, PLD1, COL5A2, ACP5, COL4A1, ALDH1A3, ARG1, MMP2, SDC2, BST1, TPPP, EML1, NEDD4, HEBP2, TBR1, CXCL1, NOS3, FHL5, TFPI, DNALI1, CDK6, SERPINH1, CALCRL, SCNN1A, IGFBP2, MMP14, PROCR, KCNE4, DPT, LPAR1, TNIP3, ARHGEF38, CSGALNACT1, BMP1, C1R, CDH13, COL15A1, CNN3, NKG7, TXNDC5, TES, MFAP4, PTPRD, ADAM15, CGA, PDGFRB, ITGA2, SULF1, PDPN, COL4A4, WWTR1, HLA-DRB1, EDNRA, SGK1, IBSP, CD302, IL32, PCSK7, EYA2, ASPA, P2RY13, CFI, PDLIM3, GEM, TREM2, OSMR, EGR2, PCOLCE, UTRN, NPC2, GPR171, MYOZ2, KLK12, IGFBP5, P4HA1, NAV3, LAMB2, IFIT3, PLAU, GUCY1A3, GJA1, FOXC1, TSPAN8, TAGLN, C2orf54, TSPAN1, PMM2)                                                                                                                                              | Aorta (p<1.0e-16)          | Aorta (0.00341)         |
| SDCBP    | Aorta (616)          | Aorta (175)         | Aorta (0.284)          | Aorta (PTPRG, CAV2, PRKCE, NOD1, PSORS1C1, LY75, TNFRSF1B, MT1H, C3, SPP1, CTSK, CNTN5, ITGB8, PTGIR, PHACTR2, ZNF423, ZCCHC24, NOX4, IQCG, TLE1, FAP, ABI1, FYTDD1, NCAM1, MT1G, ARHGAP10, MMP1, FBLN2, CD247, SLC35G2, HLA-DOB, GNAI3, FKBP10, MYH11, MCL1, CTGF, CXCL12, PPAP2B, TARBP1, WNT2, GLDC, MAP3K11, TMEM204, KDR, IL24, AXL, IL10, LRP1, PIK3R1, RBMS1, LPP, NMB, NID1, PLN, RERG, ABCA8, ROBO1, AHNK2, HS3ST1, FN1, C1S, ERAP2, AIDA, EFHD1, C4A, KIAA1549L, SPIN1, KCNMA1, DYRK4, NINJ2, AZGP1, KCNJ2, DYSF, COL5A2, BCAR3, COL4A1, ALDH1A3, MX1, ME1, ABCA1, TMPPRSS2, PTPRK, SH2B3, EWSR1, C6orf106, ARL15, MMP2, HLA-C, EML1, NEDD4, IPOB, CXCL1, FHL5, ADM, ITGA7, ASB9, IFIT2, RAMP1, HEG1, SERPINH1, CALCRL, CXCL6, NPTN, PRKCA, MMP14, CLCN3, CSTB, PROCR, KCNE4, IRF1, SPR, DPT, PRKAR2B, HIVEP2, TNFRSF10D, KIT, CSGALNACT1, PLA2G7, C1R, CDH13, COL15A1, MFAP4, PTPRD, BACE1, SP100, DKK1, BBOX1, EDN1, ERG, NR4A2, PDGFRB, GBE1, HTRA1, GAS2, SCD, TGDS, PDPN, FGF2, EFEMP2, WWTR1, SUSP1, EDNRA, CD302, FTO, SSR1, ADAMTS3, FPR3, CTSS, PRPF6, ASPA, PTPRT, MARCH2, CFI, GEM, LRRC41, CBS, TRIP10, TREM2, TIMP3, OSMR, C10orf10, CAV1, CD320, MT1B, ZFPM2, SMAD1, PDLIM4, FBP1, P4HA1, LAMB2, GUCY1A3, RFTN1, LPGAT1, ITGA7, CHN1) | Aorta (p<1.0e-16)          | Aorta (0.0227)          |
| CD74     | Adipose (17)         | Adipose (6)         | Adipose (0.352)        | Adipose (HLA-DRA, CIITA, HLA-DQA1, HLA-C, HLA-DRB1, HLA-DQB1)                                                                                                                                                                                                                                                                                                                                                                                                                                                                                                                                                                                                                                                                                                                                                                                                                                                                                                                                                                                                                                                                                                                                                                                                 | Adipose (p<1.0e-16)        | Adipose (0.00682)       |
| MCOLN1   | Brain (35)           | Brain (13)          | Brain (0.371)          | Brain (TRAIP, CXCL12, RTN3, GGT7, CCDC85B, TKT, ARPC3, ATP2B1, STK32C, GIGYF1, CLCN3, CDH13, AFF3)                                                                                                                                                                                                                                                                                                                                                                                                                                                                                                                                                                                                                                                                                                                                                                                                                                                                                                                                                                                                                                                                                                                                                            | Brain (p<1.0e-16)          | Brain (0.00455)         |
| ZBTB44   | Liver (25)           | Liver (10)          | Liver (0.4)            | Liver (TOMM40, APOC3, CPEB3, ZBTB44, S1PR5, E124, SPC24, OXR1, FOXRED1, ST3GAL4)                                                                                                                                                                                                                                                                                                                                                                                                                                                                                                                                                                                                                                                                                                                                                                                                                                                                                                                                                                                                                                                                                                                                                                              | Liver (p<1.0e-16)          | Liver (0.00114)         |
| IGFBP6   | Artery (189)         | Artery (70)         | Artery (0.370)         | Artery (CAV2, GDF15, C3, BCAM, PHLDA1, COL4A2, ZCCHC24, APOE, AHR, ABLIM1, CTGF, C1RL, SHC1, FGFR3, IFIT1, AXL, LRP1, LPP, NID1, TIMP2, CTSH, AHNK2, FGFR1, EPS8, FN1, ITGB4, COL4A1, TPM1, CRIM1, ZEB1, PALLD, ERCC1, TFPI, ADM, SMAD7, C16orf45, IRS1, TRIOBP, PROCR, GATA3, BMP1, C1R, TES, CREG1, ANXA4, SEMA3C, S100A13, PDGFRB, JUND, HTRA1, IGFBP7, FGF2, EFEMP2, WWTR1, RGL1, SGK1, LOX, AKR1C1, GFPT2, RTN2, CAV1, PCOLCE, TGFB1, IGFBP5, DKK3, PDLIM4, LAMB2, IFIT3, TAGLN, QSOX1)                                                                                                                                                                                                                                                                                                                                                                                                                                                                                                                                                                                                                                                                                                                                                                  | Artery (p<1.0e-16)         | Artery (0.0159)         |
| CTSB     | Smooth_muscle (224)  | Smooth_muscle (79)  | Smooth_muscle (0.35)   | Smooth_muscle (KLF4, CLIC4, UBE2H, RIOK3, CALHM2, COL4A2, TNFSF10, GRN, APOE, CDKN1A, CUL7, DMWD, PRNP, GTPBP4, INPP5A, FGFR3, CLIC3, SERINC1, KDELR2, MGAT1, RRAGA, HEXB, CTSH, IFITM1, MYOF, SDC4, WBP1L, UCP2, ETS2, IFITM2, BMPR2, HLA-B, CCPG1, LIPA, TPM1, BAG6, MICAL2, C6orf106, LRPAP1, OASL, ATP2B1, PALLD, UGGT2, FSCN1, TMEM97, HERPUD1, OAS1, RHOQ, CSTB, CREB3, SH3BP5, CTSA, TRIM22, CDH13, PVRL2, CREG1, ANXA4, SOD2, HTRA1,                                                                                                                                                                                                                                                                                                                                                                                                                                                                                                                                                                                                                                                                                                                                                                                                                  | Smooth_muscle (p<1.0e-16)  | Smooth_muscle (0.0102)  |

|          |                           |                           |                              |                                                                                                                                                                                                                                                                                                                                                                                                                                                                                                                                                                                                                                                                                                                                                                                                                                                                                                                                                                                                                                                                                                                                                                                                                                                                                                                                                                                                                                                                                                                                                                                                                  |                                  |                               |
|----------|---------------------------|---------------------------|------------------------------|------------------------------------------------------------------------------------------------------------------------------------------------------------------------------------------------------------------------------------------------------------------------------------------------------------------------------------------------------------------------------------------------------------------------------------------------------------------------------------------------------------------------------------------------------------------------------------------------------------------------------------------------------------------------------------------------------------------------------------------------------------------------------------------------------------------------------------------------------------------------------------------------------------------------------------------------------------------------------------------------------------------------------------------------------------------------------------------------------------------------------------------------------------------------------------------------------------------------------------------------------------------------------------------------------------------------------------------------------------------------------------------------------------------------------------------------------------------------------------------------------------------------------------------------------------------------------------------------------------------|----------------------------------|-------------------------------|
|          |                           |                           |                              | IGFBP7, ISG15, SLC20A1, MAP1LC3B, AP1B1, IGF2R, PRCP, GLI3, SEC61A1, TP53I3, ACTN1, PCOLCE, NPC2, P4HA1, IFIT3, PLAU, SWAP70, LAMC1, SLC7A5, SCAMP2)                                                                                                                                                                                                                                                                                                                                                                                                                                                                                                                                                                                                                                                                                                                                                                                                                                                                                                                                                                                                                                                                                                                                                                                                                                                                                                                                                                                                                                                             |                                  |                               |
| SERPINC1 | Adipose (34)              | Adipose (10)              | Adipose (0.294)              | Adipose (PLG, C4BP, CA5A, APOA5, APOF, MAT1A, PAH, AKR1C1, APOA1, F2)                                                                                                                                                                                                                                                                                                                                                                                                                                                                                                                                                                                                                                                                                                                                                                                                                                                                                                                                                                                                                                                                                                                                                                                                                                                                                                                                                                                                                                                                                                                                            | Adipose (p<1.0e-16)              | Adipose (0.0148)              |
| SLIT2    | Aorta (778)               | Aorta (218)               | Aorta (0.280)                | Aorta (NEFH, ACOT2, OGFRL1, ALOX5AP, ZCCHC2, TRIM5, DNASE1L3, FOS, TNFRSF1B, HAS1, CBR1, ALDH6A1, SPATC1, MAPRE2, CYB5R2, GALNT1, DPYSL2, MEOX1, MRPL24, TMEM57, NOX4, GAB2, TAF1A, MEST, AHR, SORBS2, SH3PXD2A, MMP1, MMP3, PEBP1, ACTR2, TNIK, SLIT3, MYH11, ITPR1, GBP2, PRNP, PTGDS, PPAP2B, DAAM1, MITF, MAP3K7CL, FDX1, TEX2, NAT2, HLA-DPB1, MMP10, C1orf56, TCEA2, FAM155A, LEFTY2, NCR1, GRAMD3, CXCR4, ARSA, CACNA1C, MRAS, SLC26A2, PIK3R1, RBMS1, PLN, MGAT1, MSI1, ABCA8, CWF19L1, ZNF184, COL3A1, CLDN5, NFIX, CTSH, THSD4, HIP1, FRY, TLR1, HS3ST1, SLC6A6, PDGFD, FIGN, C1S, MAFB, TGFB3, BNIP3L, IFITM1, EFHD1, TVP23B, GUCY1A2, SEMA5A, RETSAT, KCNMA1, ZNF646, AGT, LRRC48, KLF2, PNMA2, MCC, PTN, CCR9, HLA-B, TCF7L2, ENC1, CRISPLD2, PRKACB, EPHB1, NR2F2, ALDH1A3, MANSC1, HDAC9, PFN2, ARG1, TPM1, CRIM1, PNRC1, CLASP2, SEMA6A, OPTN, RTN1, CST7, BST1, ACSS3, AMPH, FABP2, WWC2, CLEC1A, HOXB2, ATP2B1, RHOT1, PALLD, FAM102A, ASB9, IFIT2, HEG1, HERPUD1, CALCR1, SCARB2, FIG4, FAM19A2, RHOQ, PROCR, DPT, PRKAR2B, EZH1, HIPK2, PRICKLE1, TESC, SORT1, TSPAN14, MYLK, GBP1, CLASRP, C1R, CDH13, COL15A1, UBA7, CNN3, PVRL2, RORA, SP100, CREG1, VIPR1, ANKRD1, ANXA4, GAB1, SEMA3C, EDN1, ERG, SOD2, FGF12, TLR5, MXRA7, TLE4, PLA2G12A, APBB1, CYP4F3, LILRB1, FGF2, WWTR1, SGK1, GAP43, GAL3ST1, CD302, HHEX, LOX, STXBP1, MLLT11, NRP2, FES, ASPA, STX11, ZEB2, ARID4A, BACH1, VGLL3, SLC4A5, NR1D2, SLC22A3, CAMTA2, PSD3, ITGA1, CNTN3, PCOLCE, NPC2, LTBP1, NR2C2, ZFPM2, CORO1C, NAV3, LAMB2, IFIT3, GUCY1A3, SWAP70, FOXC1, TSPAN8, ITGAV, PBX3, TAGLN, NFIB, TTC28, TSPAN1) | Aorta (p<1.0e-16)                | Aorta (0.0670)                |
| ABCG8    | Liver (30)                | Liver (10)                | Liver (0.333)                | Liver (GNL3, CPSF4L, NFIX, SLC22A4, CRIM1, ABCG5, ABCG8, BCL2L11, OSMR, DYNC2L1)                                                                                                                                                                                                                                                                                                                                                                                                                                                                                                                                                                                                                                                                                                                                                                                                                                                                                                                                                                                                                                                                                                                                                                                                                                                                                                                                                                                                                                                                                                                                 | Liver (p<1.0e-16)                | Liver (0.0102)                |
| NME6     | Kidney (10)               | Kidney (4)                | Kidney (0.4)                 | Kidney (NME6, HYAL1, CSPG5, CDC25A)                                                                                                                                                                                                                                                                                                                                                                                                                                                                                                                                                                                                                                                                                                                                                                                                                                                                                                                                                                                                                                                                                                                                                                                                                                                                                                                                                                                                                                                                                                                                                                              | Kidney (p<1.0e-16)               | Kidney (0.00227)              |
| C1R      | Cardiac_muscle (304)      | Cardiac_muscle (101)      | Cardiac_muscle (0.332)       | Cardiac_muscle (EMILIN1, ACOT2, VAT1, CLIC4, IFITM3, PYGL, CALHM2, ATP1B3, CTSK, ACAA2, COL4A2, GRN, PODXL, PCOLCE2, TAGLN2, MYH11, CTGF, SLC27A3, LGALS1, RGS10, NINL, TYMS, PSMA5, AXL, SND1, PECAM1, AHNK2, FGFR1, EPS8, SCP2, FN1, PLXND1, C1S, TPM2, IFITM1, GAS6, PHLD2, C4A, MYOF, VKORC1, PTRF, HADHA, FAM20C, DIP2C, MAP3K5, IFITM2, TCF7L2, CRISPLD2, ANP32E, TPM1, OPTN, NPR1, ARHGDI, RRAS2, HEBP2, PALLD, ALDH2, FSCN1, ADM, SMAD7, TNS1, KDELR3, LPAR1, MYLK, MPRIP, LPIN1, GPX1, C1R, COL15A1, CNN3, TXNDC5, DENND5A, CREG1, FAM114A1, S100A13, PSMD12, GBE1, HTRA1, SEPT11, IGFBP7, EFEMP2, WWTR1, CD302, LOX, PRCP, TGOLN2, GFPT2, DSTN, ACTN1, SYNGR2, GRB10, CAV1, ADAMTSL3, LTBP1, CORO1C, PSMD9, MTAP, SWAP70, CALR, LAMC1, TAGLN)                                                                                                                                                                                                                                                                                                                                                                                                                                                                                                                                                                                                                                                                                                                                                                                                                                                          | Cardiac_muscle (p<1.0e-16)       | Cardiac_muscle (0.0136)       |
| DPYD     | Cardiac_muscle (143)      | Cardiac_muscle (44)       | Cardiac_muscle (0.307)       | Cardiac_muscle (VAT1, OGFRL1, CLIC4, CAV2, PLA2G4A, PLCE1, MT1G, TAGLN2, PRNP, PLIN2, MTSS1, KDELR2, ITGB5, CTSH, FGFR1, PLXND1, C1S, NRP1, ALKBH5, ETS2, IFITM2, HLA-B, ABCA1, CRIM1, TACC1, HLA-C, HLA-DRB3, ZFP36, HEG1, SERPINH1, F2R, WWTR1, CES2, IFI30, ZEB2, TIMP3, CAV1, PCOLCE, LTBP1, PLAU, SWAP70, CALR, ITGAV, LAMC1)                                                                                                                                                                                                                                                                                                                                                                                                                                                                                                                                                                                                                                                                                                                                                                                                                                                                                                                                                                                                                                                                                                                                                                                                                                                                               | Cardiac_muscle (p<1.0e-16)       | Cardiac_muscle (0.0159)       |
| AK021074 | Kidney (11)               | Kidney (4)                | Kidney (0.363)               | Kidney (GNA13, PRKCA, RPRML, RUNDC3A)                                                                                                                                                                                                                                                                                                                                                                                                                                                                                                                                                                                                                                                                                                                                                                                                                                                                                                                                                                                                                                                                                                                                                                                                                                                                                                                                                                                                                                                                                                                                                                            | Kidney (p<1.0e-16)               | Kidney (0.00227)              |
| BNIP3L   | Aorta (286)               | Aorta (88)                | Aorta (0.307)                | Aorta (VAT1, GNLY, GALNS, PLA1A, PKMYT1, MT1H, HAS1, C3, PHLD1, SPP1, NOX4, TRIM21, MT1G, MMP1, MMP3, FBLN2, SLC35G2, GPR65, TREX1, DAAM1, INSR, ARHGEF5, PDE4A, FUT5, GRK5, AMPD3, UPB1, SLC26A2, EPS8, HS3ST1, GREM2, TPM2, BNIP3L, NAT6, TVP23B, KCNMA1, HLA-DQA1, PTN, NCF2, LRP10, TCF7L2, ALDH1A3, MX1, CKM, MMP13, EML1, CAMP, ISG20, CXCL1, GPR1, LIPG, GDF5, MMP14, HS3ST2, PROCR, KCNE4, PRKAR2B, LPAR1, KIT, GBP1, ARTN, SUSDS, NGF, CDH13, DKK1, EDN1, ERG, KDM4B, PDGFRB, TWIST1, NRXN2, RGL1, FGF5, LOX, P2RY1, LDB3, ZBTB20, MTF2, TIMP3, CAV1, SCUBE2, UTRN, CEP170, ZFPM2, LAMB2, GJA1, TBX2, TSPAN1)                                                                                                                                                                                                                                                                                                                                                                                                                                                                                                                                                                                                                                                                                                                                                                                                                                                                                                                                                                                           | Aorta (p<1.0e-16)                | Aorta (0.0136)                |
| LAMA2    | Adipose (33)              | Adipose (11)              | Adipose (0.333)              | Adipose (PLA1A, PDGFRA, ITGBL1, COL3A1, EPS8, FN1, SCARA5, NUP210, ACSS2, SLC22A3, LAMC1)                                                                                                                                                                                                                                                                                                                                                                                                                                                                                                                                                                                                                                                                                                                                                                                                                                                                                                                                                                                                                                                                                                                                                                                                                                                                                                                                                                                                                                                                                                                        | Adipose (p<1.0e-16)              | Adipose (0.025)               |
| M93275   | Brain (16)                | Brain (6)                 | Brain (0.375)                | Brain (FGGY, ZDHHC21, PEMT, CDKN2B, MLLT3, NFIB)                                                                                                                                                                                                                                                                                                                                                                                                                                                                                                                                                                                                                                                                                                                                                                                                                                                                                                                                                                                                                                                                                                                                                                                                                                                                                                                                                                                                                                                                                                                                                                 | Brain (p<1.0e-16)                | Brain (0.00227)               |
| RIF1     | Heart (11)                | Heart (2)                 | Heart (0.181)                | Heart (MALAT1, NBEAL1)                                                                                                                                                                                                                                                                                                                                                                                                                                                                                                                                                                                                                                                                                                                                                                                                                                                                                                                                                                                                                                                                                                                                                                                                                                                                                                                                                                                                                                                                                                                                                                                           | Heart (p<0.00114)                | Heart (p<0.00114)             |
| ANXA3    | Liver (49)                | Liver (14)                | Liver (0.285)                | Liver (GIMAP8, LPL, PARP8, SLPI, SIGLEC5, EML1, ADM, CXCL6, EHD4, SCD, CTSS, TBXAS1, GCA, PLAU)                                                                                                                                                                                                                                                                                                                                                                                                                                                                                                                                                                                                                                                                                                                                                                                                                                                                                                                                                                                                                                                                                                                                                                                                                                                                                                                                                                                                                                                                                                                  | Liver (p<1.0e-16)                | Liver (0.00114)               |
| TRIM22   | Vascular_endothelium (90) | Vascular_endothelium (33) | Vascular_endothelium (0.366) | Vascular_endothelium (IFITM3, TNFSF10, CDKN1A, GBP2, CTGF, DDH58, IFIT1, CXCR4, STAT3, C1S, IFITM1, ICAM1, UCP2, IFITM2, HLA-B, PON2, MX1, NMI, HLA-C, OAS1, PROCR, IRF1, GBP1, F2R, C1R, TRIM22, SP100, ANXA4, CMPK2, ISG15, PRCP, IFI30, IFIT3)                                                                                                                                                                                                                                                                                                                                                                                                                                                                                                                                                                                                                                                                                                                                                                                                                                                                                                                                                                                                                                                                                                                                                                                                                                                                                                                                                                | Vascular_endothelium (p<1.0e-16) | Vascular_endothelium (0.0114) |
| SLC1A5   | Muscle (40)               | Muscle (11)               | Muscle (0.275)               | Muscle (APOC1, APOE, PPP2R1B, RASD1, C14orf180, TRIM67, SLC1A5, RTN4RL1, CDCC61, SLC22A3, FBXO21)                                                                                                                                                                                                                                                                                                                                                                                                                                                                                                                                                                                                                                                                                                                                                                                                                                                                                                                                                                                                                                                                                                                                                                                                                                                                                                                                                                                                                                                                                                                | Muscle (p<1.0e-16)               | Muscle (0.01136)              |
| AK007927 | Muscle (16)               | Muscle (5)                | Muscle (0.3125)              | Muscle (SLC22A5, LRRC48, SLC22A4, SMCR8, LINS2)                                                                                                                                                                                                                                                                                                                                                                                                                                                                                                                                                                                                                                                                                                                                                                                                                                                                                                                                                                                                                                                                                                                                                                                                                                                                                                                                                                                                                                                                                                                                                                  | Muscle (p<1.0e-16)               | Muscle (0.00341)              |
| MAFF     | Liver (27)                | Liver (10)                | Liver (0.370)                | Liver (TNFRSF12A, GDF15, PHLDA1, MCL1, NAV2, TRIB1, LDLR, ZFP36, EPHA2, SLC20A1)                                                                                                                                                                                                                                                                                                                                                                                                                                                                                                                                                                                                                                                                                                                                                                                                                                                                                                                                                                                                                                                                                                                                                                                                                                                                                                                                                                                                                                                                                                                                 | Liver (p<1.0e-16)                | Liver (0.0182)                |
| STAT3    | PPI (102)                 | PPI (35)                  | PPI (0.343)                  | PPI (CDKN1A, PDGFRA, JUN, FGFR3, FLT1, CXCR4, RPS6KA5, BRCA1, HDAC3, STMN1, NLK, STAT5B, STAT3, ZNF467, MAP3K7, MTOR, NMI, RAC1, PML, KAT5, EIF2AK2, PRKCD, PTPN11, JAK3, FOXM1, PDGFRB, HNF1A, SUMO4, FES, IL2RA, IL6R, IGF1R, RELA, FER, ZNF148)                                                                                                                                                                                                                                                                                                                                                                                                                                                                                                                                                                                                                                                                                                                                                                                                                                                                                                                                                                                                                                                                                                                                                                                                                                                                                                                                                               | PPI (p<0.00114)                  | PPI (p<0.00114)               |
| ITGA7    | Adipose (37)              | Adipose (8)               | Adipose (0.216)              | Adipose (COL4A2, VTN, PNPLA3, ADAMT57, COL4A1, NPR1, ITGA7, DCBLD1)                                                                                                                                                                                                                                                                                                                                                                                                                                                                                                                                                                                                                                                                                                                                                                                                                                                                                                                                                                                                                                                                                                                                                                                                                                                                                                                                                                                                                                                                                                                                              | Adipose (p<1.0e-16)              | Adipose (0.0261)              |
| KL       | Brain (42)                | Brain (8)                 | Brain (0.190)                | Brain (KCNJ13, CLIC6, FN1, KCNE2, IGFBP2, COL4A4, SLC2A12, PRLR)                                                                                                                                                                                                                                                                                                                                                                                                                                                                                                                                                                                                                                                                                                                                                                                                                                                                                                                                                                                                                                                                                                                                                                                                                                                                                                                                                                                                                                                                                                                                                 | Brain (p<1.0e-16)                | Brain (0.00114)               |

|             |               |              |                 |                                                                                                                                                                                                                                                                                                                      |                     |                    |
|-------------|---------------|--------------|-----------------|----------------------------------------------------------------------------------------------------------------------------------------------------------------------------------------------------------------------------------------------------------------------------------------------------------------------|---------------------|--------------------|
| CD14        | Adipose (48)  | Adipose (10) | Adipose (0.208) | Adipose (ALOX5AP, C19orf38, KCNK5, P2RX4, PRKCA, C4orf19, CENPA, SLC9A9, SLC22A3, IGFBP5)                                                                                                                                                                                                                            | Adipose (p<1.0e-16) | Adipose (0.067)    |
| GEM         | Kidney (18)   | Kidney (6)   | Kidney (0.333)  | Kidney (RASGEF1B, RASD1, TAL2, CXCL1, SGK1, GEM)                                                                                                                                                                                                                                                                     | Kidney (p<1.0e-16)  | Kidney (0.00114)   |
| ZNF467      | Liver (22)    | Liver (9)    | Liver (0.409)   | Liver (ARHGEF5, PDE4A, ADAMTS7, SNED1, ZNF467, GREM2, VAMP5, LDLR, PARP12)                                                                                                                                                                                                                                           | Liver (p<1.0e-16)   | Liver (0.00341)    |
| SHC1        | PPI (118)     | PPI (46)     | PPI (0.389)     | PPI (CALCOCO2, ERBB4, MST1R, GRAP2, CSK, GAB2, MAPKAPK2, CD247, PTPN6, PLCG1, PPAP2B, SHC1, FLT1, KDR, AXL, LRP1, STAT5B, PIK3R1, FGFR1, EPS8, NGFR, PIK3R2, LTK, BCL3, ITGB4, TEK, GRB2, TPR, AP2A2, DAG1, EPHA2, CBL, PRKCA, NTRK1, IRS1, PRKCD, PAK1, PTPN11, GAB1, PDGFRB, PLCG2, ESR1, CSF1R, PTK2, GRAP, VAV1) | PPI (p<1.0e-16)     | PPI (0.00114)      |
| SMAD1       | PPI (111)     | PPI (35)     | PPI (0.315)     | PPI (SMAD3, ZNF423, RAB30, NEDD9, UBE2Z, ING2, ZNF8, SOX5, ZBTB44, TNNT1, TTF1, HOXD13, COL4A1, EWSR1, AP2A2, BMPR1A, PLEKHB1, FHL5, BTBD2, HIPK2, PAK1, ARL4D, ZNF76, ZNF521, UBA52, SMAD6, KAT2B, GLI3, ZEB2, HBP1, SNIP1, TRIP6, SMAD1, RAB34, VEPH1)                                                             | PPI (p<1.0e-16)     | PPI (0.00114)      |
| IGSF10      | Muscle (45)   | Muscle (7)   | Muscle (0.155)  | Muscle (MEOX1, CXCL12, COL6A3, COL3A1, OLR1, SERTAD4, COL5A2)                                                                                                                                                                                                                                                        | Muscle (p<1.0e-16)  | Muscle (0.0545)    |
| FBLN9       | PPI (22)      | PPI (13)     | PPI (0.590)     | PPI (COL4A2, FBLN2, COL4A3, NID1, ATN1, FN1, HSPG2, COL4A1, COL18A1, ACAN, LAMC2, LAMA1, COL4A4)                                                                                                                                                                                                                     | PPI (p<1.0e-16)     | PPI (0.00682)      |
| BTNL2       | Liver (26)    | Liver (5)    | Liver (0.192)   | Liver (FLT1, LIPA, TBC1D2B, TBC1D8, DDX59)                                                                                                                                                                                                                                                                           | Liver (p<1.0e-16)   | Liver (0.0170)     |
| COASY       | Muscle (26)   | Muscle (11)  | Muscle (0.423)  | Muscle (EPHX2, ACAD10, PAFAH2, PFKL, RBPMS2, COASY, ACSF3, HSD17B12, MPDU1, TGOLN2, DDT)                                                                                                                                                                                                                             | Muscle (p<1.0e-16)  | Muscle (0.00795)   |
| MMT00002956 | Liver (36)    | Liver (7)    | Liver (0.194)   | Liver (RGS1, RASGEF1B, CPSF4L, KLF2, IFIH1, ITGAX, PLEK)                                                                                                                                                                                                                                                             | Liver (p<1.0e-16)   | Liver (0.05)       |
| TRAPPC3     | Brain (40)    | Brain (11)   | Brain (0.275)   | Brain (PRMT1, PODXL, DNAJC7, GGT7, PYGB, ALDH2, CALCRL, TRAF4, RAPGEF4, SURF6, ALG8)                                                                                                                                                                                                                                 | Brain (p<1.0e-16)   | Brain (0.0523)     |
| PTCHD1      | Adipose (104) | Adipose (18) | Adipose (0.173) | Adipose (DNASE1L3, FOS, PKIB, CTSK, RGS1, RHPN2, MYH11, NPTX1, ATP6V0D2, CHN2, MYO1E, KCNJ2, CD200R1L, CALCRL, TNIP3, CLEC7A, ABCB4, PLAU)                                                                                                                                                                           | Adipose (p<1.0e-16) | Adipose (0.00227)  |
| THADA       | Brain (19)    | Brain (8)    | Brain (0.421)   | Brain (THADA, HAAO, ABCG5, LRPPRC, ACAD9, PLEKHH2, ZFP36L2, DYNCL1)                                                                                                                                                                                                                                                  | Brain (p<1.0e-16)   | Brain (0.00114)    |
| LOXL1       | Muscle (30)   | Muscle (12)  | Muscle (0.4)    | Muscle (COL4A2, CSK, PDGFRA, COL6A3, MRGPRF, LRRC16A, SERPINH1, BACE1, PCOLCE, LOXL1, VASN, MGAT5)                                                                                                                                                                                                                   | Muscle (p<1.0e-16)  | Muscle (0.00568)   |
| PCOLCE2     | Liver (32)    | Liver (14)   | Liver (0.437)   | Liver (MORF4L1, PCOLCE2, ATP11A, ARHGEF16, CTSH, LRP10, CLEC4F, EMR1, PILRB, PAQR9, SLC01B1, PROCR, RGL1, SLC9A9)                                                                                                                                                                                                    | Liver (p<1.0e-16)   | Liver (0.00341)    |
| CTNBN1      | PPI (135)     | PPI (37)     | PPI (0.274)     | PPI (SMAD3, PTPN6, PYGO1, MITF, FLT1, KDR, PIK3R1, PECAM1, AXIN2, TCF7L1, GRIN1, BCL3, TCF7L2, CTNNA3, PTPRK, IGF2BP1, GNA13, FSCN1, CDK6, SMAD7, GLIS2, RUVBL1, CDK5R1, GRIK2, MAGI1, SMARCA4, HNF1A, NF2, ESR1, NEURL2, CA9, TRIP10, PTPRJ, CBY1, CDH15, FER, MAGI2)                                               | PPI (p<1.0e-16)     | PPI (0.00114)      |
| ALDOB       | Muscle (30)   | Muscle (9)   | Muscle (0.3)    | Muscle (APOC3, UPB1, MARCO, APOA5, MAT1A, ANKRD1, CYP2A13, F2, FBP1)                                                                                                                                                                                                                                                 | Muscle (p<1.0e-16)  | Muscle (0.0102)    |
| SCARA3      | Muscle (30)   | Muscle (8)   | Muscle (0.266)  | Muscle (FCGR2B, TIMP2, FN1, EFHD1, GPC6, MMP2, SFRP2, CSF1R)                                                                                                                                                                                                                                                         | Muscle (p<1.0e-16)  | Muscle (0.0375)    |
| HELZ        | Muscle (32)   | Muscle (12)  | Muscle (0.375)  | Muscle (CEP95, RYR1, SRP68, SMG7, PRKCA, SMARCA4, METTL23, C17orf58, MYL4, ING5, ZBTB20, CELSR2)                                                                                                                                                                                                                     | Muscle (p<1.0e-16)  | Muscle (0.00227)   |
| VPS33A      | Adipose (21)  | Adipose (9)  | Adipose (0.428) | Adipose (NCOB2, ACAD10, UBC, CUX2, PTPN11, VPS33A, MAFK, CAMKK2, GPC2)                                                                                                                                                                                                                                               | Adipose (p<1.0e-16) | Adipose (0.00114)  |
| PTPN11      | PPI (109)     | PPI (40)     | PPI (0.366)     | PPI (SLAMF1, TREML1, GAB2, NEDD9, PTPN6, PDGFRA, PLCG1, SHC1, FLT1, LILRB4, KDR, CXCR4, AXL, STAT5B, PIK3R1, STAT3, PECAM1, PILRA, BDKRB2, TEK, GRB2, PILRB, CAT, EPHA2, CBL, PRKCA, NTRK1, IRS1, MAP3K4, KIT, PTPN11, SIT1, GAB1, PDGFRB, ARHGAP1, IGF1R, CAV1, PTK2, DAB1, PRLR)                                   | PPI (p<1.0e-16)     | PPI (0.0295)       |
| TCF3        | Adipose (25)  | Adipose (9)  | Adipose (0.36)  | Adipose (SEMA5A, ADAMTS10, RETSAT, MAT2A, GGCX, GSTT1, VAMP8, HSPA12B, SNX10)                                                                                                                                                                                                                                        | Adipose (p<1.0e-16) | Adipose (0.00341)  |
| CYP1B1      | Brain (49)    | Brain (11)   | Brain (0.224)   | Brain (CTGF, CXCL12, KDR, SLC6A20, PDXDC1, RBPMS2, BMP6, SLC6A13, CD163, DYNCL1, FOXC1)                                                                                                                                                                                                                              | Brain (p<1.0e-16)   | Brain (0.0580)     |
| COLEC12     | Kidney (17)   | Kidney (6)   | Kidney (0.352)  | Kidney (NCAM1, TMSB10, FN1, IFITM2, KCNE4, FSTL1)                                                                                                                                                                                                                                                                    | Kidney (p<1.0e-16)  | Kidney (0.00682)   |
| BC042789    | Kidney (11)   | Kidney (2)   | Kidney (0.181)  | Kidney (APOC3, ST3GAL4)                                                                                                                                                                                                                                                                                              | Kidney (p<1.0e-16)  | Kidney (0.00909)   |
| OAS2        | Kidney (12)   | Kidney (4)   | Kidney (0.333)  | Kidney (IFIT1, APOA4, OAS1, MMP12)                                                                                                                                                                                                                                                                                   | Kidney (p<0.00114)  | Kidney (p<0.00114) |
| ZDHC17      | Brain (61)    | Brain (11)   | Brain (0.180)   | Brain (SKI, PRMT1, PYGO1, MTSS1, JAZF1, PPP2R3A, RAP1A, HLA-C, SF3A3, CAMK2A, FGF5)                                                                                                                                                                                                                                  | Brain (p<1.0e-16)   | Brain (0.0466)     |

Note: "Genes with CAD 1000 Genomes GWAS P<0.001 in KD subnetworks" annotate the genes with its CAD association strength from CAD 1000 Genomes based on the most significant SNP among all SNPs mapped to a gene based on chromosome distance or eQTLs.

## Supplemental Table IV. Gene expression alterations of KD subnetworks in CAD patients using GSEA.

### Part 1

| Subnetworks                | Blood    |         | Endothelial Cell |          | Epicardial Adipose |         | Macrophages |         | PBMC     |         | Resting Monocytes |         |
|----------------------------|----------|---------|------------------|----------|--------------------|---------|-------------|---------|----------|---------|-------------------|---------|
|                            | P_Values | FDRs    | P_Values         | FDRs     | P_Values           | FDRs    | P_Values    | FDRs    | P_Values | FDRs    | P_Values          | FDRs    |
| DUSP6_AORTA                | 1.2E-02  | 1.1E-01 | 4.6E-10          | 7.9E-07  | 4.2E-03            | 1.1E-01 | 5.0E-02     | 5.1E-01 | 4.0E-01  | 9.9E-01 | 5.1E-10           | 8.7E-08 |
| IRF1_ARTERY                | 4.7E-03  | 3.3E-02 | 2.0E-07          | 6.5E-06  | 1.2E-12            | 1.1E-10 | 5.7E-05     | 2.0E-02 | 1.2E-01  | 7.1E-01 | 7.9E-01           | 8.8E-01 |
| MSN_VASCULAR_ENDOTHELIUM   | 1.5E-02  | 1.1E-01 | 7.5E-09          | 9.1E-07  | 9.7E-11            | 9.1E-09 | 5.9E-01     | 8.4E-01 | 1.4E-02  | 4.4E-01 | 3.8E-04           | 8.1E-03 |
| LUM_BRAIN                  | NA       | NA      | <1.0E-16         | <1.0E-16 | 9.5E-01            | 9.6E-01 | 7.6E-02     | 5.9E-01 | 8.1E-01  | 1.0E+00 | <1.0E-16          | 2.7E-14 |
| CXCL10_LIVER               | 3.9E-01  | 5.8E-01 | <1.0E-16         | 2.5E-06  | 1.0E-02            | 2.3E-02 | <1.0E-16    | 1.1E-14 | 6.9E-01  | 9.1E-01 | 1.6E-02           | 4.8E-02 |
| GBP1_VASCULAR_ENDOTHELIUM  | 4.7E-02  | 2.2E-01 | 2.4E-07          | 6.3E-05  | 9.8E-10            | 1.4E-08 | 3.8E-02     | 4.4E-01 | 1.1E-01  | 8.1E-01 | 6.3E-01           | 7.6E-01 |
| IFI35_ARTERY               | 4.9E-05  | 3.7E-03 | 1.1E-01          | 1.9E-01  | 2.0E-03            | 1.6E-02 | 1.3E-01     | 6.3E-01 | 5.1E-01  | 9.9E-01 | 6.1E-04           | 1.5E-01 |
| CCL18_AORTA                | 3.2E-02  | 2.8E-01 | 5.1E-06          | 2.1E-04  | 2.9E-04            | 7.2E-03 | 2.4E-01     | 7.5E-01 | 1.5E-02  | 5.1E-01 | 1.5E-02           | 1.8E-01 |
| DUSP6_VASCULAR_ENDOTHELIUM | 2.1E-01  | 9.0E-01 | 7.6E-06          | 8.9E-04  | 2.0E-05            | 6.5E-03 | 2.6E-01     | 7.5E-01 | 8.7E-01  | 9.3E-01 | 4.9E-11           | 9.0E-09 |
| SHC1_PPI                   | 1.5E-01  | 3.7E-01 | <1.0E-16         | 1.0E-07  | 9.1E-02            | 1.7E-01 | 5.6E-02     | 4.7E-01 | 3.7E-01  | 9.7E-01 | 2.2E-04           | 4.7E-03 |
| MAFF_LIVER                 | 4.2E-01  | 7.8E-01 | <1.0E-16         | <1.0E-16 | 4.8E-02            | 8.4E-02 | 5.1E-01     | 8.4E-01 | 7.4E-01  | 9.3E-01 | 3.9E-11           | 8.2E-09 |
| DUSP1_AORTA                | 7.2E-02  | 2.7E-01 | 3.9E-07          | 5.1E-05  | 5.8E-02            | 2.1E-01 | 2.1E-01     | 6.6E-01 | 4.6E-01  | 8.9E-01 | 1.9E-05           | 4.0E-04 |
| ZYX_SMOOTH_MUSCLE          | 4.4E-04  | 3.6E-03 | 2.0E-06          | 5.8E-04  | 1.6E-01            | 3.0E-01 | 7.9E-01     | 1.0E+00 | 5.2E-06  | 1.4E-02 | 2.2E-01           | 4.4E-01 |
| TNFAIP2_CARDIAC_MUSCLE     | 2.1E-01  | 4.3E-01 | 2.3E-06          | 7.8E-05  | 4.9E-06            | 1.6E-03 | 6.7E-01     | 8.3E-01 | 4.3E-04  | 1.6E-01 | 4.4E-01           | 6.4E-01 |
| ADM_ARTERY                 | 4.5E-02  | 2.1E-01 | 8.6E-06          | 9.0E-05  | 1.2E-04            | 2.9E-02 | 5.4E-01     | 8.6E-01 | 7.3E-01  | 1.0E+00 | 1.3E-03           | 5.0E-02 |
| DUSP6_ARTERY               | 3.9E-01  | 5.9E-01 | 1.6E-11          | 6.6E-10  | 1.0E-04            | 1.5E-03 | 6.1E-01     | 8.6E-01 | 9.0E-01  | 1.0E+00 | 1.4E-03           | 1.6E-02 |

|                             |         |         |          |          |         |         |         |         |         |         |         |         |
|-----------------------------|---------|---------|----------|----------|---------|---------|---------|---------|---------|---------|---------|---------|
| CFD_AORTA                   | 1.6E-01 | 3.7E-01 | 3.2E-07  | 6.8E-05  | 5.7E-05 | 1.5E-02 | 4.1E-01 | 8.0E-01 | 6.1E-01 | 1.0E+00 | 1.3E-02 | 5.9E-02 |
| MMT00002956_LIVER           | 4.8E-02 | 4.5E-01 | <1.0E-16 | 5.9E-08  | 1.2E-07 | 3.2E-05 | 2.9E-01 | 7.1E-01 | 5.0E-01 | 9.8E-01 | 6.8E-01 | 8.2E-01 |
| SLC2A3_AORTA                | 8.6E-02 | 3.0E-01 | 6.0E-09  | 7.5E-08  | 2.1E-03 | 3.5E-02 | 1.8E-02 | 3.9E-01 | 3.4E-01 | 8.8E-01 | 8.3E-02 | 3.1E-01 |
| ANXA3_LIVER                 | 5.4E-01 | 7.1E-01 | <1.0E-16 | 9.2E-07  | 7.3E-02 | 7.9E-01 | 3.4E-01 | 7.9E-01 | 4.3E-02 | 4.4E-01 | 3.0E-01 | 5.1E-01 |
| DUSP1_SMOOTH_MUSCLE         | 3.1E-02 | 1.1E-01 | 3.1E-10  | 1.1E-08  | 8.9E-05 | 7.6E-03 | 4.2E-01 | 7.6E-01 | 6.7E-01 | 9.3E-01 | 4.2E-04 | 8.8E-03 |
| MMP9_PPI                    | NA      | NA      | <1.0E-16 | <1.0E-16 | 6.0E-01 | 7.5E-01 | 4.8E-01 | 7.8E-01 | 4.0E-01 | 8.4E-01 | 5.4E-02 | 1.3E-01 |
| ADAM9_AORTA                 | 7.5E-01 | 9.1E-01 | 2.6E-07  | 7.5E-06  | 6.4E-02 | 1.5E-01 | 3.0E-04 | 2.1E-02 | 9.9E-01 | 9.8E-01 | 2.8E-03 | 2.6E-02 |
| RAC2_CARDIAC_MUSCLE         | 2.1E-03 | 2.8E-02 | 1.0E-01  | 2.0E-01  | 5.6E-10 | 2.1E-08 | 8.1E-01 | 9.3E-01 | 1.1E-02 | 3.3E-01 | 1.0E+00 | 9.7E-01 |
| HLA-F_ARTERY                | 2.2E-03 | 4.5E-02 | 1.9E-02  | 6.7E-02  | 4.9E-05 | 1.2E-03 | 1.5E-01 | 6.3E-01 | 6.5E-01 | 1.0E+00 | 9.1E-01 | 9.5E-01 |
| ISG15_CARDIAC_MUSCLE        | 6.5E-03 | 2.0E-02 | 8.9E-03  | 4.3E-02  | 2.1E-03 | 1.5E-02 | 3.4E-01 | 7.7E-01 | 3.0E-01 | 8.8E-01 | 6.9E-01 | 7.8E-01 |
| SLIT2_AORTA                 | 7.5E-01 | 8.8E-01 | 1.2E-08  | 2.1E-06  | 3.9E-01 | 5.1E-01 | 1.6E-01 | 6.6E-01 | 6.8E-01 | 1.0E+00 | 1.6E-02 | 1.3E-01 |
| ANXA1_ARTERY                | 5.8E-01 | 9.6E-01 | 3.7E-06  | 6.7E-04  | 2.2E-01 | 3.7E-01 | 4.4E-02 | 3.0E-01 | 6.6E-02 | 4.8E-01 | 4.9E-02 | 1.3E-01 |
| COL1A1_LIVER                | 9.6E-01 | 9.7E-01 | 1.7E-09  | 1.7E-07  | 3.6E-01 | 8.6E-01 | 2.0E-01 | 6.9E-01 | 4.6E-02 | 4.8E-01 | 1.0E-01 | 2.4E-01 |
| DUSP1_ARTERY                | 9.5E-01 | 9.8E-01 | 7.6E-11  | 5.9E-10  | 1.4E-04 | 3.9E-02 | 4.4E-01 | 7.4E-01 | 9.8E-01 | 9.8E-01 | 6.5E-04 | 1.7E-02 |
| STAT3_PPI                   | 6.9E-01 | 9.4E-01 | 2.4E-02  | 9.9E-02  | 2.2E-01 | 3.9E-01 | 4.0E-01 | 7.5E-01 | 8.8E-01 | 1.0E+00 | 9.7E-13 | 7.6E-11 |
| KCNK13_LIVER                | 3.8E-01 | 5.7E-01 | <1.0E-16 | 1.2E-04  | 4.5E-01 | 5.8E-01 | 7.2E-02 | 3.7E-01 | 3.5E-01 | 8.3E-01 | 9.5E-01 | 1.0E+00 |
| SDCBP_AORTA                 | 3.5E-01 | 5.7E-01 | 1.3E-07  | 6.1E-05  | 2.2E-01 | 4.1E-01 | 3.2E-04 | 1.0E-02 | 7.8E-01 | 9.3E-01 | 9.8E-02 | 2.5E-01 |
| DUSP6_CARDIAC_MUSCLE        | 6.1E-01 | 9.1E-01 | 4.4E-10  | 7.4E-08  | 3.1E-01 | 4.6E-01 | 8.5E-01 | 9.1E-01 | 5.2E-01 | 1.0E+00 | 3.1E-04 | 6.6E-03 |
| IRF7_ADIPOSE                | 6.3E-03 | 1.8E-02 | 6.4E-03  | 9.1E-02  | NA      | NA      | 1.1E-02 | 8.8E-02 | 2.0E-01 | 7.2E-01 | 2.3E-02 | 1.6E-01 |
| PTPN11_PPI                  | 2.8E-01 | 5.1E-01 | 1.1E-07  | 5.2E-03  | 2.5E-01 | 4.3E-01 | 5.4E-01 | 8.4E-01 | 6.8E-01 | 1.0E+00 | 6.1E-02 | 2.4E-01 |
| ANXA1_SMOOTH_MUSCLE         | 4.5E-01 | 7.7E-01 | 7.6E-07  | 5.9E-05  | 2.3E-05 | 5.7E-03 | 3.6E-01 | 7.7E-01 | 7.6E-01 | 9.5E-01 | 3.7E-01 | 6.3E-01 |
| BST2_ARTERY                 | 1.3E-04 | 6.6E-03 | 8.4E-01  | 8.9E-01  | 6.1E-03 | 1.9E-02 | 8.3E-02 | 4.7E-01 | 1.1E-01 | 6.4E-01 | 7.7E-01 | 8.1E-01 |
| IRF9_SMOOTH_MUSCLE          | 4.4E-04 | 8.5E-03 | 3.9E-02  | 8.2E-02  | 6.2E-02 | 1.2E-01 | 3.6E-01 | 7.3E-01 | 9.1E-01 | 1.0E+00 | 6.1E-01 | 7.6E-01 |
| TRIM22_VASCULAR_ENDOTHELIUM | 1.2E-04 | 1.0E-03 | 3.9E-01  | 9.5E-01  | 8.6E-03 | 1.5E-02 | 3.6E-01 | 7.7E-01 | 2.9E-01 | 7.6E-01 | 9.0E-01 | 9.5E-01 |
| CD74_ADIPOSE                | 2.2E-02 | 6.0E-02 | 3.4E-01  | 4.0E-01  | 3.8E-08 | 4.4E-06 | 4.1E-08 | 2.1E-06 | 9.5E-01 | 9.9E-01 | 6.3E-01 | 8.0E-01 |
| C1R_CARDIAC_MUSCLE          | 4.1E-01 | 6.0E-01 | 5.7E-10  | 9.3E-08  | 9.2E-01 | 1.0E+00 | 9.1E-01 | 9.6E-01 | 4.9E-01 | 1.0E+00 | 1.2E-03 | 2.1E-02 |
| JAG1_VASCULAR_ENDOTHELIUM   | 2.7E-01 | 8.3E-01 | 1.5E-06  | 5.7E-04  | 3.2E-01 | 4.2E-01 | 2.7E-01 | 6.7E-01 | 2.1E-01 | 8.2E-01 | 4.2E-04 | 8.9E-03 |
| KLF6_SMOOTH_MUSCLE          | 8.6E-01 | 8.9E-01 | 2.8E-07  | 2.6E-05  | 8.9E-03 | 8.3E-02 | 7.6E-01 | 8.9E-01 | 5.7E-01 | 9.3E-01 | 2.3E-03 | 4.9E-02 |
| GBP2_BLOOD                  | 8.9E-06 | 8.5E-04 | 1.5E-02  | 1.8E-02  | NA      | NA      | 2.2E-01 | 6.4E-01 | 5.7E-04 | 1.4E-01 | 2.3E-01 | 4.7E-01 |
| ANXA2_CARDIAC_MUSCLE        | 9.7E-01 | 9.1E-01 | 8.2E-06  | 2.1E-04  | 6.6E-03 | 1.5E-01 | 9.9E-01 | 1.0E+00 | 2.3E-01 | 9.2E-01 | 3.5E-03 | 7.3E-02 |
| CTSB_SMOOTH_MUSCLE          | 2.9E-01 | 5.2E-01 | 2.9E-06  | 7.5E-05  | 8.0E-02 | 1.6E-01 | 8.6E-01 | 1.0E+00 | 4.1E-02 | 4.4E-01 | 2.8E-01 | 4.9E-01 |
| PAPSS2_CARDIAC_MUSCLE       | 1.3E-01 | 8.1E-01 | 8.2E-05  | 2.5E-04  | 8.7E-01 | 1.0E+00 | 3.5E-01 | 7.6E-01 | 2.3E-01 | 7.6E-01 | 1.6E-02 | 8.6E-02 |
| COL5A1_ADIPOSE              | NA      | NA      | 4.5E-01  | 5.2E-01  | 4.7E-02 | 9.0E-01 | 7.2E-01 | 9.3E-01 | 1.4E-01 | 8.0E-01 | 4.7E-01 | 6.3E-01 |
| COL4A2_PPI                  | NA      | NA      | <1.0E-16 | <1.0E-16 | 8.7E-01 | 1.0E+00 | NA      | NA      | 9.2E-01 | 1.0E+00 | NA      | NA      |
| GBP1_BLOOD                  | 4.8E-02 | 1.2E-01 | 7.5E-01  | 8.6E-01  | NA      | NA      | 1.5E-02 | 1.1E-01 | 6.0E-03 | 1.3E-01 | 6.9E-02 | 2.6E-01 |
| CD14_ADIPOSE                | 2.5E-01 | 3.7E-01 | 1.4E-02  | 4.6E-02  | 5.9E-01 | 6.9E-01 | 1.9E-03 | 1.6E-02 | 1.2E-02 | 2.8E-01 | 2.6E-01 | 4.4E-01 |
| GEM_KIDNEY                  | NA      | NA      | <1.0E-16 | 3.5E-14  | 7.3E-02 | 1.2E-01 | 4.9E-01 | 8.3E-01 | 5.6E-01 | 9.1E-01 | NA      | NA      |
| PTCHD1_ADIPOSE              | 4.1E-01 | 5.8E-01 | 1.0E-02  | 5.1E-02  | 2.0E-01 | 3.4E-01 | 6.1E-01 | 9.5E-01 | 6.2E-01 | 9.0E-01 | 6.0E-01 | 7.7E-01 |
| IGSF10_MUSCLE               | NA      | NA      | 3.6E-03  | 1.4E-02  | 6.6E-01 | 1.0E+00 | 6.3E-01 | 8.4E-01 | 9.7E-01 | 1.0E+00 | 5.1E-03 | 3.4E-02 |
| CXCL12_CARDIAC_MUSCLE       | 3.0E-01 | 7.5E-01 | 7.1E-03  | 2.1E-02  | 3.0E-01 | 4.2E-01 | 7.1E-01 | 9.1E-01 | 6.3E-01 | 1.0E+00 | 2.2E-01 | 4.0E-01 |
| CXCL12_ADIPOSE              | 9.3E-02 | 1.8E-01 | 8.4E-02  | 1.2E-01  | 4.9E-01 | 6.0E-01 | 4.4E-01 | 8.3E-01 | 1.7E-01 | 7.5E-01 | 4.2E-01 | 6.2E-01 |
| BNIP3L_AORTA                | 3.5E-01 | 8.4E-01 | 2.6E-07  | 7.1E-05  | 7.2E-01 | 8.1E-01 | 5.4E-01 | 8.5E-01 | 2.6E-01 | 8.1E-01 | 6.9E-02 | 1.8E-01 |
| ANXA2_PPI                   | 1.0E-01 | 4.0E-01 | 4.6E-02  | 7.8E-02  | 9.1E-01 | 9.7E-01 | 3.8E-01 | 7.5E-01 | 5.7E-04 | 1.7E-02 | 3.8E-01 | 5.9E-01 |
| LOXL2_LIVER                 | 5.0E-01 | 6.8E-01 | 9.0E-05  | 2.5E-03  | 5.4E-01 | 6.4E-01 | 2.2E-01 | 5.7E-01 | 2.3E-01 | 7.9E-01 | 5.8E-01 | 7.7E-01 |
| LY96_VASCULAR_ENDOTHELIUM   | 1.5E-02 | 5.5E-02 | 1.9E-03  | 1.0E-02  | 3.1E-01 | 4.1E-01 | 2.9E-02 | 1.2E-01 | 8.9E-02 | 4.8E-01 | 6.9E-01 | 8.5E-01 |
| IFI30_SMOOTH_MUSCLE         | 6.3E-03 | 4.7E-02 | 4.8E-02  | 5.4E-02  | 3.9E-01 | 5.1E-01 | 5.3E-01 | 8.3E-01 | 4.2E-01 | 9.7E-01 | 4.8E-01 | 6.8E-01 |
| HGD_MUSCLE                  | NA      | NA      | 2.9E-01  | 3.7E-01  | NA      | NA      | NA      | NA      | 5.4E-01 | 9.5E-01 | NA      | NA      |
| ADM_SMOOTH_MUSCLE           | 1.3E-02 | 6.6E-02 | 4.6E-05  | 1.2E-03  | 7.2E-01 | 8.2E-01 | 9.0E-01 | 9.7E-01 | 7.7E-01 | 1.0E+00 | 5.5E-02 | 1.3E-01 |
| ITGB4_AORTA                 | 4.4E-01 | 6.4E-01 | 1.8E-03  | 4.8E-03  | 3.5E-01 | 4.8E-01 | 9.0E-01 | 9.7E-01 | 1.7E-01 | 7.8E-01 | 1.4E-01 | 3.0E-01 |
| SLC1A5_MUSCLE               | NA      | NA      | 5.9E-02  | 1.0E-01  | 3.3E-01 | 9.9E-01 | 7.0E-02 | 7.1E-01 | 4.9E-01 | 1.0E+00 | 4.5E-01 | 6.4E-01 |
| COL6A3_LIVER                | 4.2E-01 | 8.3E-01 | 1.1E-02  | 4.6E-02  | 9.2E-01 | 1.0E+00 | 5.5E-01 | 8.5E-01 | 1.2E-01 | 7.6E-01 | 3.0E-01 | 4.9E-01 |
| IGFBP6_ARTERY               | 8.5E-01 | 9.3E-01 | 8.3E-04  | 2.6E-03  | 3.3E-01 | 9.0E-01 | 5.9E-01 | 8.5E-01 | 6.0E-01 | 9.0E-01 | 8.7E-02 | 2.1E-01 |
| EPS8_LIVER                  | NA      | NA      | 2.4E-02  | 4.6E-02  | NA      | NA      | 8.2E-01 | 9.6E-01 | 8.6E-01 | 9.8E-01 | 4.7E-02 | 1.1E-01 |
| ABC8_LIVER                  | NA      | NA      | 2.8E-01  | 3.5E-01  | NA      | NA      | 1.3E-01 | 6.6E-01 | 8.3E-02 | 5.5E-01 | 3.3E-01 | 5.2E-01 |
| CYP11B1_BRAIN               | 5.7E-01 | 7.2E-01 | 1.5E-06  | 5.1E-04  | 9.3E-01 | 1.0E+00 | 2.2E-01 | 6.0E-01 | 8.7E-01 | 9.9E-01 | 2.8E-01 | 4.9E-01 |
| SPARC_MUSCLE                | 9.7E-01 | 9.8E-01 | 1.3E-02  | 2.3E-02  | 9.9E-02 | 9.2E-01 | 3.3E-01 | 7.4E-01 | 9.3E-01 | 1.0E+00 | 8.3E-01 | 9.3E-01 |
| FN1_PPI                     | 1.2E-01 | 2.6E-01 | 8.3E-03  | 3.4E-02  | 3.9E-01 | 5.0E-01 | 4.0E-01 | 7.9E-01 | 4.3E-01 | 9.9E-01 | 8.8E-01 | 9.4E-01 |
| GBP1_ADIPOSE                | NA      | NA      | 9.6E-01  | 9.8E-01  | NA      | NA      | 1.0E-01 | 4.4E-01 | 3.5E-02 | 3.6E-01 | 6.9E-04 | 1.4E-02 |
| APOB_PPI                    | 6.3E-02 | 3.6E-01 | 6.3E-01  | 7.6E-01  | 8.5E-01 | 9.2E-01 | 1.7E-01 | 4.9E-01 | 4.1E-01 | 8.3E-01 | 2.7E-01 | 4.4E-01 |
| EFEMP1_CARDIAC_MUSCLE       | 8.6E-01 | 9.5E-01 | 3.2E-06  | 9.0E-04  | 9.3E-01 | 1.0E+00 | 8.4E-01 | 9.5E-01 | 9.8E-01 | 1.0E+00 | 2.9E-03 | 1.4E-02 |
| WWC2_AORTA                  | 4.8E-01 | 6.5E-01 | 1.6E-02  | 3.4E-02  | 8.7E-01 | 1.0E+00 | 7.4E-02 | 3.8E-01 | 2.3E-01 | 7.8E-01 | 1.1E-01 | 2.1E-01 |
| ZNF496_LIVER                | NA      | NA      | 3.7E-01  | 1.0E+00  | NA      | NA      | 7.6E-01 | 9.2E-01 | 6.8E-02 | 4.8E-01 | 6.0E-02 | 2.4E-01 |
| DPYD_CARDIAC_MUSCLE         | 6.1E-01 | 8.1E-01 | 1.7E-02  | 4.2E-02  | 8.6E-01 | 9.0E-01 | 3.7E-01 | 8.4E-01 | 8.2E-01 | 1.0E+00 | 1.1E-01 | 2.4E-01 |
| COL4A2_MUSCLE               | NA      | NA      | 3.9E-02  | 5.7E-02  | 8.5E-01 | 1.0E+00 | 5.6E-01 | 8.5E-01 | 1.7E-01 | 7.2E-01 | 3.6E-01 | 5.5E-01 |
| SLIT3_MUSCLE                | NA      | NA      | 3.2E-01  | 3.9E-01  | 9.0E-02 | 1.0E+00 | 1.2E-01 | 5.6E-01 | 9.2E-01 | 1.0E+00 | 1.1E-01 | 2.1E-01 |
| SCARA3_MUSCLE               | NA      | NA      | 5.9E-02  | 9.2E-02  | 4.3E-01 | 9.3E-01 | 1.6E-01 | 5.5E-01 | 9.9E-02 | 5.8E-01 | NA      | NA      |
| CKLF_LIVER                  | 2.0E-01 | 6.9E-01 | 2.0E-01  | 2.9E-01  | 3.5E-01 | 4.6E-01 | 9.1E-01 | 9.7E-01 | 6.5E-01 | 1.0E+00 | 6.2E-01 | 8.0E-01 |
| MTMR11_LIVER                | 1.4E-01 | 3.0E-01 | 2.4E-01  | 3.6E-01  | 1.0E+00 | 1.0E+00 | 6.1E-01 | 8.4E-01 | 2.8E-01 | 9.0E-01 | 4.2E-01 | 6.2E-01 |
| PCOLCE2_LIVER               | 7.2E-01 | 9.0E-01 | 2.0E-02  | 3.1E-02  | 7.4E-01 | 1.0E+00 | 2.9E-01 | 6.7E-01 | 3.6E-01 | 9.3E-01 | 4.3E-01 | 6.2E-01 |
| DUSP6_SMOOTH_MUSCLE         | 3.2E-01 | 7.7E-01 | 4.1E-06  | 8.0E-04  | 9.1E-01 | 1.0E+00 | 1.0E+00 | 1.0E+00 | 6.3E-01 | 1.0E+00 | 3.1E-02 | 7.3E-02 |
| TCF3_ADIPOSE                | NA      | NA      | 7.2E-01  | 8.3E-01  | NA      | NA      | NA      | NA      | 3.7E-01 | 8.4E-01 | 4.4E-01 | 6.3E-01 |
| ZNF467_LIVER                | NA      | NA      | 5.3E-01  | 8.4E-01  | NA      | NA      | 2.2E-01 | 6.6E-01 | 4.3E-02 | 4.1E-01 | 5.7E-01 | 7.9E-01 |
| MSN_LIVER                   | 8.8E-01 | 9.3E-01 | 2.1E-01  | 2.9E-01  | 4.4E-02 | 7.5E-02 | 9.3E-01 | 9.9E-01 | 5.8E-01 | 9.1E-01 | 2.2E-01 | 4.4E-01 |
| LAMA2_ADIPOSE               | NA      | NA      | 6.2E-02  | 9.2E-02  | 8.1E-01 | 8.8E-01 | 2.6E-01 | 7.0E-01 | 7.5E-01 | 1.0E+00 | 5.6E-01 | 7.6E-01 |
| KL_BRAIN                    | 7.8E-01 | 9.4E-01 | 2.0E-01  | 2.9E-01  | 8.4E-01 | 1.0E+00 | 1.4E-01 | 4.8E-01 | 2.1E-01 | 7.9E-01 | NA      | NA      |
| NOTCH1_PPI                  | 2.1E-01 | 4.0E-01 | 6.3E-01  | 7.2E-01  | 5.1E-02 | 1.0E-01 | 2.1E-01 | 6.7E-01 | 8.2E-01 | 1.0E+00 | 7.9E-01 | 8.8E-01 |
| AW475929_BRAIN              | 9.5E-02 | 2.0E-01 | 9.5E-01  | 9.7E-01  | NA      | NA      | 2.5E-01 | 6.4E-01 | 5.8E-01 | 1.0E+00 | 5.1E-01 | 7.1E-01 |
| IL15RA_LIVER                | NA      | NA      | 6.5E-02  | 8.3E-02  | NA      | NA      | 8.5E-01 | 1.0E+00 | 8.1E-01 | 1.0E+00 | 6.4E-01 | 7.3E-01 |
| HELZ_MUSCLE                 | NA      | NA      | 6.0E-01  | 8.7E-01  | NA      | NA      | 4.1E-01 | 8.0E-01 | 3.4E-01 | 8.6E-01 | 2.0E-01 | 5.2E-01 |
| CXCL12_LIVER                | NA      | NA      | 9.5E-01  | 9.8E-01  | 3.0E-01 | 1.0E+00 | NA      | NA      | 7.5E-01 | 1.0E+00 | 1.4E-01 | 3.0E-01 |

|                      |         |         |         |         |         |         |         |         |         |         |         |         |
|----------------------|---------|---------|---------|---------|---------|---------|---------|---------|---------|---------|---------|---------|
| AK007927_MUSCLE      | NA      | NA      | 1.6E-02 | 3.2E-02 | NA      | NA      | NA      | NA      | 1.8E-01 | 7.1E-01 | NA      | NA      |
| CTNNB1_PPI           | 7.3E-01 | 9.2E-01 | 9.2E-01 | 8.7E-01 | 1.3E-01 | 1.0E+00 | 9.9E-01 | 9.5E-01 | 9.4E-01 | 1.0E+00 | 7.8E-01 | 8.7E-01 |
| APOF_MUSCLE          | NA      | NA      | 8.9E-02 | 1.5E-01 | NA      | NA      | NA      | NA      | 4.5E-02 | 6.3E-01 | NA      | NA      |
| COLEC12_KIDNEY       | NA      | NA      | 4.4E-02 | 5.5E-02 | NA      | NA      | NA      | NA      | 1.5E-01 | 6.4E-01 | NA      | NA      |
| RDH16_BRAIN          | NA      | NA      | 2.8E-01 | 3.3E-01 | NA      | NA      | NA      | NA      | 1.7E-02 | 2.9E-01 | NA      | NA      |
| CFB_BRAIN            | NA      | NA      | 1.5E-02 | 1.7E-02 | NA      | NA      | NA      | NA      | 3.0E-01 | 9.0E-01 | NA      | NA      |
| PAPSS2_SMOOTH_MUSCLE | NA      | NA      | 3.0E-02 | 4.6E-02 | 7.2E-01 | 1.0E+00 | NA      | NA      | 2.6E-01 | 7.5E-01 | NA      | NA      |
| HEMGN_MUSCLE         | NA      | NA      | 9.6E-03 | 2.4E-02 | NA      | NA      | NA      | NA      | 4.4E-01 | 9.8E-01 | NA      | NA      |
| PLG_LIVER            | NA      | NA      | 2.2E-01 | 2.9E-01 | NA      | NA      | NA      | NA      | 4.4E-01 | 8.5E-01 | NA      | NA      |
| WIPP1_LIVER          | NA      | NA      | 1.9E-01 | 1.0E+00 | NA      | NA      | NA      | NA      | 1.2E-01 | 5.0E-01 | NA      | NA      |
| LOXL1_MUSCLE         | NA      | NA      | 8.2E-01 | 8.9E-01 | 9.8E-01 | 1.0E+00 | NA      | NA      | 7.8E-01 | 1.0E+00 | NA      | NA      |
| APOC2_MUSCLE         | NA      | NA      | 5.3E-02 | 8.3E-02 | NA      | NA      | NA      | NA      | 2.7E-01 | 7.6E-01 | NA      | NA      |
| KNG1_MUSCLE          | NA      | NA      | 7.6E-01 | 8.6E-01 | NA      | NA      | NA      | NA      | 5.7E-01 | 9.1E-01 | NA      | NA      |
| CXCL12_MUSCLE        | NA      | NA      | 5.9E-02 | 8.4E-02 | NA      | NA      | NA      | NA      | 3.0E-01 | 9.2E-01 | NA      | NA      |
| F2_MUSCLE            | NA      | NA      | 2.4E-01 | 3.2E-01 | NA      | NA      | NA      | NA      | 7.2E-01 | 1.0E+00 | NA      | NA      |
| ZBTB44_LIVER         | NA      | NA      | 1.6E-01 | 9.8E-01 | NA      | NA      | 8.3E-01 | 9.7E-01 | 4.0E-01 | 9.7E-01 | 8.9E-01 | 9.7E-01 |
| PHACTR1_BRAIN        | NA      | NA      | 7.0E-02 | 1.0E-01 | NA      | NA      | NA      | NA      | 5.8E-01 | 1.0E+00 | NA      | NA      |
| AZGP1_ADIPOSE        | NA      | NA      | 1.2E-01 | 1.2E-01 | NA      | NA      | NA      | NA      | 5.8E-01 | 9.0E-01 | NA      | NA      |
| FBP1_MUSCLE          | NA      | NA      | 1.1E-01 | 1.2E-01 | NA      | NA      | NA      | NA      | 6.5E-01 | 1.0E+00 | NA      | NA      |
| NM_009245_BRAIN      | NA      | NA      | 2.5E-01 | 3.0E-01 | NA      | NA      | NA      | NA      | 4.6E-01 | 9.0E-01 | NA      | NA      |
| KNG1_BRAIN           | NA      | NA      | 5.4E-01 | 6.1E-01 | NA      | NA      | NA      | NA      | 1.9E-01 | 7.4E-01 | NA      | NA      |
| ACVR1C_BRAIN         | NA      | NA      | 6.0E-01 | 7.0E-01 | NA      | NA      | NA      | NA      | 2.0E-01 | 7.6E-01 | NA      | NA      |
| APOA5_BRAIN          | NA      | NA      | 2.1E-02 | 2.1E-02 | NA      | NA      | NA      | NA      | 9.3E-01 | 1.0E+00 | NA      | NA      |
| ALDOB_MUSCLE         | NA      | NA      | 4.3E-01 | 4.8E-01 | NA      | NA      | NA      | NA      | 4.0E-01 | 8.7E-01 | NA      | NA      |
| RDH16_MUSCLE         | NA      | NA      | 1.9E-01 | 2.4E-01 | NA      | NA      | NA      | NA      | 7.6E-01 | 1.0E+00 | NA      | NA      |
| BATF2_BLOOD          | NA      | NA      | 2.0E-01 | 2.4E-01 | NA      |
| NGRN_LIVER           | NA      | NA      | 2.1E-01 | 8.3E-01 | NA      | NA      | 7.2E-01 | 1.0E+00 | 9.8E-01 | 9.8E-01 | 4.8E-01 | 7.3E-01 |
| FN1_KIDNEY           | NA      | NA      | 4.4E-01 | 9.4E-01 | NA      | NA      | NA      | NA      | 6.2E-01 | 9.0E-01 | NA      | NA      |
| APOA1_MUSCLE         | NA      | NA      | 4.6E-01 | 8.1E-01 | NA      | NA      | NA      | NA      | 6.1E-01 | 9.2E-01 | NA      | NA      |
| MATN2_PPI            | NA      | NA      | 3.4E-01 | 3.8E-01 | NA      | NA      | NA      | NA      | 7.3E-01 | 9.6E-01 | NA      | NA      |
| LDLR_PPI             | NA      | NA      | 3.8E-01 | 1.0E+00 | NA      | NA      | NA      | NA      | 7.0E-01 | 1.0E+00 | NA      | NA      |
| APOA5_LIVER          | 8.8E-01 | 9.6E-01 | 7.0E-01 | 8.0E-01 | NA      | NA      | NA      | NA      | 2.7E-01 | 7.9E-01 | NA      | NA      |
| THADA_BRAIN          | NA      | NA      | 8.0E-01 | 9.7E-01 | NA      | NA      | NA      | NA      | 2.8E-01 | 7.6E-01 | NA      | NA      |
| F2_ADIPOSE           | NA      | NA      | 7.3E-01 | 8.3E-01 | NA      | NA      | NA      | NA      | 3.6E-01 | 8.3E-01 | NA      | NA      |
| ABCG5_ADIPOSE        | NA      | 2.9E-01 | 7.7E-01 | NA      | NA      |
| MMT00081256_MUSCLE   | NA      | NA      | 3.2E-01 | 3.5E-01 | NA      |
| TGFB1_PPI            | NA      | 3.4E-01 | 8.6E-01 | NA      | NA      |
| SERPINC1_ADIPOSE     | NA      | NA      | 9.9E-01 | 9.9E-01 | NA      | NA      | NA      | NA      | 3.6E-02 | 4.9E-01 | NA      | NA      |
| NCOR2_KIDNEY         | NA      | NA      | 4.7E-01 | 8.8E-01 | NA      |
| PLG_ADIPOSE          | NA      | NA      | 5.0E-01 | 5.8E-01 | NA      | NA      | NA      | NA      | 8.9E-01 | 9.9E-01 | NA      | NA      |
| OSM_PPI              | NA      | 6.7E-01 | 9.2E-01 | NA      | NA      |
| HGD_BRAIN            | NA      | NA      | 3.9E-01 | 1.0E+00 | NA      | NA      | NA      | NA      | 9.4E-01 | 9.9E-01 | NA      | NA      |
| APOB_ADIPOSE         | NA      | NA      | 9.4E-01 | 9.8E-01 | NA      | NA      | NA      | NA      | 4.1E-01 | 8.7E-01 | NA      | NA      |
| APOC4_BRAIN          | NA      | NA      | 4.9E-01 | 5.8E-01 | NA      | NA      | NA      | NA      | 9.4E-01 | 9.7E-01 | NA      | NA      |
| M93275_BRAIN         | NA      | NA      | 8.3E-01 | 9.3E-01 | NA      |
| APOC3_BRAIN          | NA      | 8.4E-01 | 1.0E+00 | NA      | NA      |
| VPS33A_ADIPOSE       | NA      | NA      | 7.5E-01 | 9.7E-01 | NA      | NA      | NA      | NA      | 8.9E-01 | 1.0E+00 | NA      | NA      |
| APOA1_ADIPOSE        | NA      | NA      | 7.2E-01 | 8.2E-01 | NA      | NA      | NA      | NA      | 9.1E-01 | 1.0E+00 | NA      | NA      |
| MCOLN1_BRAIN         | NA      | NA      | 8.6E-01 | 9.1E-01 | NA      | NA      | 6.4E-01 | 9.7E-01 | 8.4E-01 | 9.8E-01 | 7.5E-01 | 8.8E-01 |
| APOA1_BRAIN          | NA      | NA      | 9.7E-01 | 1.0E+00 | NA      | NA      | NA      | NA      | 9.0E-01 | 1.0E+00 | NA      | NA      |

Part 2

| Subnetworks                | Stem_Cell |         | Stimulated_Monocytes |         | Subcutaneous_Adipose |         | T_cell   |         | Dataset Consistency | Z-Scores | Meta-Pvalues |
|----------------------------|-----------|---------|----------------------|---------|----------------------|---------|----------|---------|---------------------|----------|--------------|
|                            | P_Values  | FDRs    | P_Values             | FDRs    | P_Values             | FDRs    | P_Values | FDRs    |                     |          |              |
| DUSP6_AORTA                | 8.9E-03   | 2.8E-01 | 1.6E-02              | 4.8E-01 | 1.1E-01              | 5.5E-01 | 2.1E-02  | 2.9E-01 | 2                   | 8.466    | p<1.0E-16    |
| IRF1_ARTERY                | 2.2E-01   | 5.5E-01 | 7.9E-03              | 6.8E-02 | 2.2E-03              | 2.6E-02 | 2.9E-01  | 5.5E-01 | 5                   | 8.052    | 4.44E-16     |
| MSN_VASCULAR_ENDOTHELIUM   | 2.8E-03   | 2.5E-01 | 2.7E-01              | 7.2E-01 | 3.2E-01              | 7.5E-01 | 2.0E-02  | 2.2E-01 | 3                   | 8.038    | 4.44E-16     |
| LUM_BRAIN                  | 4.8E-01   | 7.4E-01 | 7.5E-01              | 9.7E-01 | 9.6E-01              | 9.8E-01 | 1.9E-03  | 5.0E-02 | 3                   | 7.306    | 1.38E-13     |
| CXCL10_LIVER               | 4.8E-01   | 7.7E-01 | 1.6E-01              | 4.8E-01 | 7.5E-01              | 9.4E-01 | 2.5E-01  | 5.0E-01 | 4                   | 6.863    | 3.37E-12     |
| GBP1_VASCULAR_ENDOTHELIUM  | 1.0E-01   | 3.8E-01 | 1.3E-03              | 3.8E-02 | 2.6E-01              | 7.3E-01 | 1.9E-01  | 4.7E-01 | 3                   | 6.699    | 1.05E-11     |
| IFI35_ARTERY               | 7.6E-01   | 9.3E-01 | 4.9E-06              | 1.6E-03 | 1.7E-02              | 1.5E-01 | 2.1E-03  | 9.5E-02 | 3                   | 6.651    | 1.46E-11     |
| CCL18_AORTA                | 1.4E-01   | 5.0E-01 | 1.7E-01              | 5.8E-01 | 2.2E-01              | 7.3E-01 | 4.1E-03  | 3.6E-01 | 2                   | 6.384    | 8.61E-11     |
| DUSP6_VASCULAR_ENDOTHELIUM | 8.9E-03   | 1.3E-01 | 4.7E-03              | 1.4E-01 | 9.3E-01              | 1.0E+00 | 9.6E-02  | 3.8E-01 | 3                   | 6.347    | 1.10E-10     |
| SHC1_PPI                   | 7.3E-02   | 3.6E-01 | 2.0E-01              | 6.4E-01 | 5.9E-01              | 8.5E-01 | 5.5E-01  | 6.4E-01 | 2                   | 5.953    | 1.32E-09     |
| MAFF_LIVER                 | 4.1E-02   | 2.2E-01 | 6.0E-01              | 8.5E-01 | 2.9E-01              | 5.8E-01 | 4.1E-01  | 5.9E-01 | 2                   | 5.946    | 1.37E-09     |
| DUSP1_AORTA                | 9.4E-03   | 2.5E-01 | 2.8E-01              | 6.4E-01 | 8.3E-01              | 9.0E-01 | 1.2E-02  | 2.1E-01 | 2                   | 5.454    | 2.46E-08     |
| ZYX_SMOOTH_MUSCLE          | 2.7E-01   | 5.8E-01 | 5.2E-03              | 4.1E-01 | 8.3E-01              | 1.0E+00 | 1.6E-01  | 3.6E-01 | 3                   | 5.239    | 8.06E-08     |
| TNFAIP2_CARDIAC_MUSCLE     | 1.4E-02   | 2.4E-01 | 8.7E-01              | 9.6E-01 | 4.7E-03              | 1.6E-01 | 5.7E-01  | 6.5E-01 | 2                   | 5.173    | 1.15E-07     |
| ADM_ARTERY                 | 5.2E-02   | 3.1E-01 | 5.3E-01              | 7.6E-01 | 1.2E-02              | 8.4E-02 | 3.1E-01  | 5.5E-01 | 2                   | 5.146    | 1.33E-07     |
| DUSP6_ARTERY               | 1.4E-02   | 2.2E-01 | 2.1E-02              | 4.2E-01 | 8.4E-01              | 9.3E-01 | 3.0E-01  | 6.0E-01 | 3                   | 5.015    | 2.65E-07     |
| CFD_AORTA                  | 4.1E-03   | 2.3E-01 | 9.2E-01              | 9.6E-01 | 1.2E-01              | 4.9E-01 | 9.2E-02  | 3.7E-01 | 2                   | 4.996    | 2.93E-07     |
| MMT0002956_LIVER           | 3.9E-01   | 6.8E-01 | 9.5E-01              | 9.6E-01 | 7.7E-02              | 3.0E-01 | 3.4E-01  | 5.5E-01 | 2                   | 4.937    | 3.97E-07     |
| SLC2A3_AORTA               | 7.8E-02   | 4.0E-01 | 2.8E-01              | 7.1E-01 | 7.4E-01              | 8.8E-01 | 3.7E-01  | 5.8E-01 | 2                   | 4.901    | 4.76E-07     |
| ANXA3_LIVER                | 5.0E-02   | 2.4E-01 | 7.9E-01              | 9.6E-01 | 2.5E-01              | 5.8E-01 | 3.4E-01  | 5.4E-01 | 1                   | 4.825    | 7.02E-07     |
| DUSP1_SMOOTH_MUSCLE        | 1.5E-02   | 2.3E-01 | 3.4E-01              | 7.1E-01 | 9.8E-01              | 9.5E-01 | 7.3E-01  | 7.6E-01 | 3                   | 4.666    | 1.54E-06     |
| MMP9_PPI                   | 3.4E-01   | 6.3E-01 | 5.6E-03              | 2.3E-01 | 7.2E-02              | 3.0E-01 | NA       | NA      | 1                   | 4.607    | 2.05E-06     |
| ADAM9_AORTA                | 7.5E-02   | 3.4E-01 | 2.0E-02              | 4.1E-01 | 6.3E-01              | 8.9E-01 | 1.2E-01  | 4.4E-01 | 3                   | 4.406    | 5.26E-06     |
| RAC2_CARDIAC_MUSCLE        | 5.1E-01   | 7.5E-01 | 8.9E-01              | 9.4E-01 | 1.1E-01              | 4.8E-01 | 2.0E-03  | 1.6E-01 | 2                   | 4.330    | 7.45E-06     |
| HLA-F_ARTERY               | 1.7E-01   | 4.3E-01 | 1.7E-02              | 1.6E-01 | 1.8E-01              | 5.1E-01 | 7.1E-02  | 5.0E-01 | 2                   | 4.307    | 8.29E-06     |
| ISG15_CARDIAC_MUSCLE       | 9.3E-01   | 9.7E-01 | 9.9E-03              | 9.2E-02 | 1.0E-04              | 1.2E-03 | 2.5E-01  | 5.3E-01 | 4                   | 4.249    | 1.07E-05     |
| SLIT2_AORTA                | 4.0E-02   | 3.5E-01 | 5.2E-01              | 7.5E-01 | 4.8E-03              | 1.9E-01 | 1.2E-01  | 4.7E-01 | 1                   | 4.210    | 1.28E-05     |
| ANXA1_ARTERY               | 1.7E-01   | 3.8E-01 | 8.5E-02              | 6.0E-01 | 5.3E-01              | 8.0E-01 | 1.3E-01  | 3.8E-01 | 1                   | 4.200    | 1.34E-05     |
| COL1A1_LIVER               | 1.6E-01   | 4.8E-01 | 6.0E-01              | 7.8E-01 | 2.5E-01              | 6.0E-01 | 5.1E-01  | 6.4E-01 | 1                   | 4.166    | 1.55E-05     |
| DUSP1_ARTERY               | 1.1E-03   | 1.6E-02 | 4.5E-01              | 7.7E-01 | 6.5E-01              | 8.7E-01 | 2.7E-01  | 5.7E-01 | 4                   | 4.120    | 1.90E-05     |
| STAT3_PPI                  | 6.9E-01   | 8.8E-01 | 6.3E-01              | 8.4E-01 | 7.4E-01              | 9.6E-01 | 8.6E-01  | 8.5E-01 | 1                   | 3.992    | 3.27E-05     |
| KCNK13_LIVER               | 1.5E-01   | 4.0E-01 | 3.8E-01              | 7.1E-01 | 4.0E-02              | 1.9E-01 | 2.8E-01  | 4.9E-01 | 1                   | 3.945    | 3.98E-05     |
| SDCBP_AORTA                | 3.2E-01   | 6.4E-01 | 2.2E-01              | 7.0E-01 | 6.6E-01              | 8.9E-01 | 1.2E-01  | 3.7E-01 | 2                   | 3.861    | 5.64E-05     |
| DUSP6_CARDIAC_MUSCLE       | 4.1E-03   | 2.3E-01 | 3.3E-01              | 7.1E-01 | 5.2E-01              | 8.5E-01 | 3.7E-01  | 5.8E-01 | 2                   | 3.811    | 6.92E-05     |
| IRF7_ADIPOSE               | 9.5E-01   | 9.7E-01 | 5.1E-04              | 1.5E-02 | NA                   | NA      | 3.9E-02  | 2.4E-01 | 2                   | 3.745    | 9.02E-05     |
| PTPN11_PPI                 | 4.3E-02   | 3.0E-01 | 2.8E-02              | 4.9E-01 | 4.7E-01              | 7.6E-01 | 2.8E-01  | 6.0E-01 | 1                   | 3.697    | 1.09E-04     |
| ANXA1_SMOOTH_MUSCLE        | 3.9E-02   | 2.4E-01 | 6.3E-02              | 5.6E-01 | 6.8E-01              | 8.6E-01 | 7.0E-01  | 7.6E-01 | 2                   | 3.565    | 1.82E-04     |
| BST2_ARTERY                | 4.4E-01   | 7.2E-01 | 1.6E-02              | 7.6E-02 | 1.2E-02              | 1.6E-01 | 6.4E-01  | 7.5E-01 | 2                   | 3.559    | 1.86E-04     |

|                             |         |         |         |         |         |         |         |         |   |        |          |
|-----------------------------|---------|---------|---------|---------|---------|---------|---------|---------|---|--------|----------|
| IRF9_SMOOTH_MUSCLE          | 8.9E-01 | 9.7E-01 | 2.7E-05 | 8.2E-04 | 9.1E-02 | 3.3E-01 | 6.7E-02 | 5.6E-01 | 2 | 3.487  | 2.45E-04 |
| TRIM22_VASCULAR_ENDOTHELIUM | 9.6E-01 | 9.9E-01 | 2.3E-03 | 2.0E-02 | 6.4E-03 | 4.9E-02 | 1.6E-01 | 3.5E-01 | 4 | 3.324  | 4.44E-04 |
| CD74_ADIPOSE                | 5.7E-01 | 8.3E-01 | 9.7E-01 | 9.9E-01 | NA      | NA      | 1.2E-02 | 2.1E-01 | 2 | 3.318  | 4.53E-04 |
| C1R_CARDIAC_MUSCLE          | 7.5E-02 | 4.0E-01 | 7.1E-01 | 8.5E-01 | 1.0E-01 | 4.8E-01 | 8.0E-02 | 3.5E-01 | 2 | 3.223  | 6.34E-04 |
| JAG1_VASCULAR_ENDOTHELIUM   | 6.0E-01 | 8.8E-01 | 6.4E-01 | 8.6E-01 | 2.2E-01 | 5.1E-01 | NA      | NA      | 2 | 3.120  | 9.05E-04 |
| KLF6_SMOOTH_MUSCLE          | 2.8E-03 | 2.3E-01 | 9.7E-01 | 9.8E-01 | 2.9E-01 | 7.5E-01 | 4.1E-01 | 6.0E-01 | 2 | 3.118  | 9.11E-04 |
| GBP2_BLOOD                  | 7.9E-01 | 9.7E-01 | 2.3E-01 | 4.9E-01 | NA      | NA      | 3.7E-01 | 5.8E-01 | 2 | 3.108  | 9.42E-04 |
| ANXA2_CARDIAC_MUSCLE        | 8.2E-03 | 1.2E-01 | 1.1E-02 | 5.7E-01 | 4.0E-01 | 8.3E-01 | 8.6E-01 | 7.7E-01 | 1 | 3.054  | 1.13E-03 |
| CTSB_SMOOTH_MUSCLE          | 6.7E-02 | 3.0E-01 | 9.4E-01 | 9.7E-01 | 3.2E-02 | 2.2E-01 | 4.6E-01 | 6.3E-01 | 1 | 3.037  | 1.19E-03 |
| PAPSS2_CARDIAC_MUSCLE       | 1.7E-01 | 4.6E-01 | 5.0E-01 | 7.2E-01 | 1.3E-01 | 4.5E-01 | 3.5E-01 | 5.1E-01 | 1 | 2.992  | 1.39E-03 |
| COL5A1_ADIPOSE              | 7.9E-02 | 4.0E-01 | 2.2E-01 | 6.1E-01 | 1.3E-04 | 1.6E-03 | 1.8E-02 | 1.5E-01 | 1 | 2.984  | 1.42E-03 |
| COL4A2_PPI                  | 4.4E-01 | 5.8E-01 | NA      | NA      | 3.3E-01 | 5.6E-01 | NA      | NA      | 1 | 2.887  | 1.94E-03 |
| GBP1_BLOOD                  | 2.1E-02 | 1.8E-01 | 8.9E-03 | 3.2E-02 | NA      | NA      | NA      | NA      | 1 | 2.850  | 2.19E-03 |
| CD14_ADIPOSE                | 9.7E-01 | 9.7E-01 | 9.0E-02 | 2.4E-01 | NA      | NA      | 3.1E-01 | 5.4E-01 | 2 | 2.637  | 4.18E-03 |
| GEM_KIDNEY                  | 4.1E-01 | 6.9E-01 | 9.2E-01 | 9.8E-01 | NA      | NA      | NA      | NA      | 1 | 2.635  | 4.21E-03 |
| PTCHD1_ADIPOSE              | 6.7E-02 | 3.0E-01 | 1.3E-01 | 6.6E-01 | 7.3E-01 | 9.8E-01 | 4.1E-01 | 5.7E-01 | 0 | 2.454  | 7.06E-03 |
| IGSF10_MUSCLE               | 3.7E-01 | 6.1E-01 | 9.6E-02 | 6.1E-01 | 1.7E-02 | 8.0E-02 | 8.2E-02 | 2.9E-01 | 2 | 2.193  | 1.42E-02 |
| CXCL12_CARDIAC_MUSCLE       | 3.7E-01 | 5.7E-01 | 1.8E-01 | 6.7E-01 | 2.3E-02 | 1.7E-01 | 4.5E-01 | 6.1E-01 | 1 | 2.140  | 1.62E-02 |
| CXCL12_ADIPOSE              | 2.1E-02 | 2.8E-01 | 8.5E-01 | 9.9E-01 | 6.1E-01 | 8.8E-01 | 3.0E-02 | 2.1E-01 | 0 | 2.109  | 1.75E-02 |
| BNIP3L_AORTA                | 1.9E-01 | 4.1E-01 | 5.6E-01 | 8.7E-01 | 9.0E-01 | 9.4E-01 | 3.8E-01 | 5.4E-01 | 1 | 2.091  | 1.83E-02 |
| ANXA2_PPI                   | 6.3E-02 | 2.9E-01 | 1.8E-01 | 6.9E-01 | 7.7E-01 | 9.5E-01 | 8.4E-01 | 9.1E-01 | 1 | 1.975  | 2.42E-02 |
| LOXL2_LIVER                 | 4.3E-01 | 6.0E-01 | 3.3E-01 | 6.9E-01 | 1.1E-01 | 3.2E-01 | NA      | NA      | 1 | 1.887  | 2.96E-02 |
| LY96_VASCULAR_ENDOTHELIUM   | 7.7E-01 | 9.8E-01 | 2.8E-01 | 5.5E-01 | 9.2E-01 | 9.7E-01 | NA      | NA      | 1 | 1.871  | 3.06E-02 |
| IFI30_SMOOTH_MUSCLE         | 8.3E-01 | 9.8E-01 | 6.9E-02 | 1.7E-01 | 2.5E-01 | 5.9E-01 | 5.3E-01 | 6.5E-01 | 1 | 1.819  | 3.44E-02 |
| HGD_MUSCLE                  | 1.4E-02 | 2.2E-01 | NA      | NA      | NA      | NA      | NA      | NA      | 0 | 1.779  | 3.76E-02 |
| ADM_SMOOTH_MUSCLE           | 4.7E-02 | 2.3E-01 | 8.0E-01 | 9.4E-01 | 4.8E-01 | 8.7E-01 | 6.8E-01 | 7.4E-01 | 1 | 1.750  | 4.00E-02 |
| ITGB4_AORTA                 | 6.4E-01 | 8.7E-01 | 2.8E-01 | 5.7E-01 | 1.8E-01 | 4.8E-01 | 4.8E-01 | 6.1E-01 | 1 | 1.709  | 4.38E-02 |
| SLC1A5_MUSCLE               | 8.1E-01 | 9.9E-01 | 2.7E-01 | 5.2E-01 | 1.3E-02 | 9.3E-02 | 3.1E-01 | 5.1E-01 | 0 | 1.661  | 4.83E-02 |
| COL6A3_LIVER                | 3.3E-01 | 5.6E-01 | 3.4E-01 | 7.2E-01 | 3.0E-01 | 5.3E-01 | 1.3E-01 | 3.8E-01 | 1 | 1.648  | 4.97E-02 |
| IGFBP6_ARTERY               | 4.5E-01 | 7.2E-01 | 5.3E-01 | 7.6E-01 | 5.1E-01 | 8.3E-01 | 4.6E-02 | 2.3E-01 | 1 | 1.630  | 5.15E-02 |
| EPS8_LIVER                  | 5.6E-01 | 8.0E-01 | 4.8E-01 | 7.3E-01 | NA      | NA      | 3.7E-02 | 2.3E-01 | 1 | 1.618  | 5.28E-02 |
| ABCG8_LIVER                 | 8.8E-02 | 4.4E-01 | 1.9E-01 | 4.5E-01 | NA      | NA      | 4.8E-02 | 2.1E-01 | 0 | 1.556  | 5.99E-02 |
| CYP1B1_BRAIN                | 1.4E-01 | 3.7E-01 | 4.2E-01 | 7.1E-01 | 8.4E-01 | 9.7E-01 | 8.3E-02 | 4.5E-01 | 1 | 1.542  | 6.16E-02 |
| SPARC_MUSCLE                | 1.2E-02 | 1.2E-01 | 4.7E-01 | 7.5E-01 | 7.2E-03 | 8.0E-02 | 3.8E-01 | 5.2E-01 | 1 | 1.503  | 6.64E-02 |
| FN1_PPI                     | 2.4E-01 | 5.5E-01 | 4.2E-01 | 7.3E-01 | 8.5E-01 | 9.6E-01 | 7.5E-02 | 2.9E-01 | 1 | 1.396  | 8.14E-02 |
| GBP1_ADIPOSE                | 9.4E-01 | 9.9E-01 | 4.4E-03 | 2.1E-02 | NA      | NA      | 1.2E-01 | 5.4E-01 | 2 | 1.323  | 9.30E-02 |
| APOB_PPI                    | 3.4E-01 | 5.3E-01 | 1.4E-01 | 6.7E-01 | 6.6E-01 | 8.8E-01 | 1.5E-01 | 3.6E-01 | 0 | 1.300  | 9.67E-02 |
| EFEMP1_CARDIAC_MUSCLE       | 8.0E-01 | 9.4E-01 | 1.7E-01 | 6.9E-01 | 2.4E-01 | 5.5E-01 | 8.7E-02 | 4.0E-01 | 2 | 1.239  | 1.08E-01 |
| WWC2_AORTA                  | 2.3E-01 | 4.5E-01 | 2.8E-01 | 6.9E-01 | 8.9E-01 | 9.4E-01 | NA      | NA      | 1 | 1.172  | 1.21E-01 |
| ZNF496_LIVER                | 1.2E-02 | 1.7E-01 | 5.2E-01 | 7.7E-01 | NA      | NA      | 1.3E-01 | 3.9E-01 | 0 | 1.097  | 1.36E-01 |
| DPYD_CARDIAC_MUSCLE         | 1.2E-01 | 3.7E-01 | 1.6E-01 | 4.3E-01 | 6.3E-01 | 8.8E-01 | 4.9E-01 | 6.4E-01 | 1 | 1.029  | 1.52E-01 |
| COL4A2_MUSCLE               | 3.0E-01 | 5.3E-01 | 1.5E-01 | 7.9E-01 | 1.2E-01 | 3.8E-01 | 4.2E-01 | 5.3E-01 | 0 | 0.883  | 1.89E-01 |
| SLIT3_MUSCLE                | 1.1E-01 | 4.0E-01 | 9.0E-01 | 9.6E-01 | 1.4E-01 | 4.6E-01 | NA      | NA      | 0 | 0.695  | 2.44E-01 |
| SCARA3_MUSCLE               | 1.8E-01 | 3.7E-01 | 7.6E-01 | 9.8E-01 | 4.8E-01 | 8.7E-01 | NA      | NA      | 0 | 0.553  | 2.90E-01 |
| CKLF_LIVER                  | 3.6E-01 | 6.4E-01 | 2.1E-01 | 7.1E-01 | 3.6E-01 | 7.5E-01 | 5.9E-01 | 7.0E-01 | 0 | 0.430  | 3.33E-01 |
| MTMR11_LIVER                | 4.4E-01 | 7.2E-01 | 1.7E-01 | 6.4E-01 | 4.8E-01 | 7.5E-01 | 3.5E-01 | 5.4E-01 | 0 | 0.357  | 3.61E-01 |
| PCOLCE2_LIVER               | 2.8E-01 | 5.6E-01 | 8.9E-01 | 9.8E-01 | 9.0E-01 | 9.5E-01 | 1.9E-01 | 3.7E-01 | 1 | 0.282  | 3.89E-01 |
| DUSP6_SMOOTH_MUSCLE         | 3.4E-01 | 6.1E-01 | 6.8E-01 | 9.1E-01 | 7.8E-01 | 9.8E-01 | NA      | NA      | 1 | 0.197  | 4.22E-01 |
| TCF3_ADIPOSE                | 4.1E-01 | 6.9E-01 | 1.2E-01 | 6.4E-01 | NA      | NA      | 3.8E-03 | 1.5E-01 | 0 | 0.187  | 4.26E-01 |
| ZNF467_LIVER                | 1.5E-01 | 3.7E-01 | 4.8E-01 | 7.1E-01 | NA      | NA      | NA      | NA      | 0 | -0.015 | 5.06E-01 |
| MSN_LIVER                   | 4.4E-01 | 7.0E-01 | 7.8E-01 | 9.3E-01 | 8.7E-01 | 9.8E-01 | 1.0E-01 | 3.7E-01 | 0 | -0.031 | 5.12E-01 |
| LAMA2_ADIPOSE               | 3.6E-01 | 5.8E-01 | 4.2E-01 | 7.0E-01 | 3.4E-01 | 5.4E-01 | NA      | NA      | 0 | -0.064 | 5.25E-01 |
| KL_BRAIN                    | 3.5E-01 | 6.2E-01 | 2.6E-01 | 6.9E-01 | 8.5E-01 | 9.6E-01 | NA      | NA      | 0 | -0.237 | 5.94E-01 |
| NOTCH1_PPI                  | 9.2E-01 | 9.6E-01 | 6.0E-01 | 8.7E-01 | 7.1E-01 | 8.9E-01 | 4.1E-01 | 5.2E-01 | 0 | -0.245 | 5.97E-01 |
| AW475929_BRAIN              | 6.5E-01 | 7.9E-01 | 2.3E-01 | 6.7E-01 | NA      | NA      | 3.6E-01 | 5.7E-01 | 0 | -0.263 | 6.04E-01 |
| IL15RA_LIVER                | 3.4E-02 | 2.6E-01 | 8.6E-01 | 9.6E-01 | NA      | NA      | 1.2E-01 | 4.7E-01 | 0 | -0.422 | 6.63E-01 |
| HELZ_MUSCLE                 | 9.0E-01 | 9.7E-01 | 4.1E-01 | 6.9E-01 | NA      | NA      | 1.6E-01 | 3.6E-01 | 0 | -0.425 | 6.65E-01 |
| CXCL12_LIVER                | 1.6E-01 | 3.9E-01 | 2.5E-01 | 6.2E-01 | 4.1E-01 | 7.5E-01 | NA      | NA      | 0 | -0.449 | 6.73E-01 |
| FBLN2_PPI                   | 7.0E-02 | 5.3E-01 | NA      | NA      | NA      | NA      | NA      | NA      | 1 | -0.468 | 6.80E-01 |
| SORL1_VASCULAR_ENDOTHELIUM  | 6.4E-01 | 8.6E-01 | 1.0E+00 | 1.0E+00 | NA      | NA      | 2.2E-01 | 3.6E-01 | 0 | -0.487 | 6.87E-01 |
| ZDHHC17_BRAIN               | 5.3E-02 | 2.2E-01 | 8.9E-01 | 9.9E-01 | 6.2E-01 | 9.0E-01 | 7.3E-01 | 7.8E-01 | 0 | -0.545 | 7.07E-01 |
| LARGE_LIVER                 | 5.3E-01 | 7.7E-01 | NA      | NA      | 1.6E-01 | 3.7E-01 | NA      | NA      | 0 | -0.569 | 7.15E-01 |
| MMT0019644_ADIPOSE          | 6.3E-01 | 8.8E-01 | 3.9E-01 | 7.2E-01 | NA      | NA      | 1.2E-01 | 4.3E-01 | 0 | -0.570 | 7.16E-01 |
| VEGFA_ADIPOSE               | 6.7E-01 | 9.0E-01 | 1.4E-01 | 5.7E-01 | NA      | NA      | NA      | NA      | 1 | -0.625 | 7.34E-01 |
| TRAPP3_BRAIN                | 1.8E-01 | 5.0E-01 | 4.3E-01 | 7.1E-01 | 5.6E-03 | 1.1E-01 | 8.4E-01 | 8.9E-01 | 0 | -0.637 | 7.38E-01 |
| ASAH1_MUSCLE                | 4.6E-01 | 7.1E-01 | 6.5E-01 | 8.8E-01 | NA      | NA      | NA      | NA      | 0 | -0.674 | 7.50E-01 |
| SMAD1_PPI                   | 2.4E-01 | 5.8E-01 | 4.8E-01 | 7.6E-01 | 5.1E-01 | 7.9E-01 | 1.0E+00 | 9.6E-01 | 0 | -0.751 | 7.74E-01 |
| BTNL9_LIVER                 | 9.8E-01 | 9.9E-01 | 4.5E-01 | 7.4E-01 | 5.0E-01 | 8.1E-01 | NA      | NA      | 0 | -0.865 | 8.06E-01 |
| ABCG5_LIVER                 | 6.4E-01 | 7.8E-01 | 6.0E-01 | 8.3E-01 | NA      | NA      | NA      | NA      | 0 | -0.957 | 8.31E-01 |
| ITGA7_ADIPOSE               | 7.9E-01 | 9.2E-01 | 8.3E-01 | 9.6E-01 | 1.3E-01 | 3.5E-01 | NA      | NA      | 0 | -1.111 | 8.67E-01 |
| COASY_MUSCLE                | 7.6E-01 | 9.7E-01 | 2.8E-01 | 6.6E-01 | NA      | NA      | 5.3E-01 | 6.3E-01 | 0 | -1.137 | 8.72E-01 |
| AK007927_MUSCLE             | NA      | 1 | -1.158 | 8.77E-01 |
| CTNNB1_PPI                  | 9.6E-01 | 9.7E-01 | 4.4E-01 | 7.5E-01 | 2.5E-01 | 5.7E-01 | 2.1E-03 | 2.7E-01 | 0 | -1.169 | 8.79E-01 |
| APOF_MUSCLE                 | NA      | 0 | -1.169 | 8.79E-01 |
| COLEC12_KIDNEY              | NA      | 0 | -1.258 | 8.96E-01 |
| RDH16_BRAIN                 | NA      | 0 | -1.268 | 8.98E-01 |
| CFB_BRAIN                   | NA      | 1 | -1.285 | 9.01E-01 |
| PAPSS2_SMOOTH_MUSCLE        | NA      | NA      | NA      | NA      | 8.3E-01 | 9.4E-01 | NA      | NA      | 1 | -1.288 | 9.01E-01 |
| HEMGN_MUSCLE                | NA      | 1 | -1.343 | 9.10E-01 |
| PLG_LIVER                   | 2.4E-01 | 4.6E-01 | NA      | NA      | NA      | NA      | NA      | NA      | 0 | -1.354 | 9.12E-01 |
| WIPF1_LIVER                 | 6.7E-01 | 8.9E-01 | NA      | NA      | NA      | NA      | NA      | NA      | 0 | -1.362 | 9.13E-01 |
| LOXL1_MUSCLE                | 5.1E-01 | 6.4E-01 | NA      | NA      | 1.6E-02 | 7.0E-02 | 2.9E-01 | 5.6E-01 | 0 | -1.383 | 9.17E-01 |
| APOC2_MUSCLE                | NA      | 0 | -1.421 | 9.22E-01 |
| KNG1_MUSCLE                 | 1.5E-01 | 4.1E-01 | 3.5E-01 | 7.2E-01 | NA      | NA      | NA      | NA      | 0 | -1.429 | 9.24E-01 |
| CXCL12_MUSCLE               | NA      | 0 | -1.467 | 9.29E-01 |
| F2_MUSCLE                   | 5.3E-01 | 7.9E-01 | 6.1E-01 | 8.4E-01 | NA      | NA      | NA      | NA      | 0 | -1.676 | 9.53E-01 |
| ZBTB44_LIVER                | 7.8E-01 | 9.7E-01 | 8.2E-01 | 9.6E-01 | NA      | NA      | 6.2E-01 | 7.2E-01 | 0 | -1.728 | 9.58E-01 |
| PHACTR1_BRAIN               | 8.4E-01 | 9.3E-01 | 7.8E-01 | 9.4E-01 | NA      | NA      | NA      | NA      | 0 | -1.752 | 9.60E-01 |
| AZGP1_ADIPOSE               | NA      | 0 | -1.817 | 9.65E-01 |
| FBP1_MUSCLE                 | NA      | 0 | -1.860 | 9.69E-01 |
| NM_009245_BRAIN             | NA      | 0 | -1.882 | 9.70E-01 |
| KNG1_BRAIN                  | NA      | 0 | -1.885 | 9.70E-01 |
| ACVR1C_BRAIN                | 8.1E-01 | 9.7E-01 | NA      | NA      | NA      | NA      | NA      | NA      | 0 | -1.949 | 9.74E-01 |

|                    |         |         |         |         |    |    |    |         |         |   |        |          |
|--------------------|---------|---------|---------|---------|----|----|----|---------|---------|---|--------|----------|
| APOA5_BRAIN        | NA      | NA      | NA      | NA      | NA | NA | NA | NA      | NA      | 1 | -1.960 | 9.75E-01 |
| ALDOB_MUSCLE       | NA      | NA      | NA      | NA      | NA | NA | NA | NA      | NA      | 0 | -1.986 | 9.76E-01 |
| RDH16_MUSCLE       | NA      | NA      | NA      | NA      | NA | NA | NA | NA      | NA      | 0 | -2.077 | 9.81E-01 |
| BATF2_BLOOD        | NA      | NA      | NA      | NA      | NA | NA | NA | NA      | NA      | 0 | -2.129 | 9.83E-01 |
| NGRN_LIVER         | 9.8E-01 | 9.9E-01 | 3.0E-01 | 6.9E-01 | NA | NA | NA | 8.3E-01 | 9.1E-01 | 0 | -2.132 | 9.83E-01 |
| FN1_KIDNEY         | NA      | NA      | NA      | NA      | NA | NA | NA | NA      | NA      | 0 | -2.176 | 9.85E-01 |
| APOA1_MUSCLE       | NA      | NA      | NA      | NA      | NA | NA | NA | NA      | NA      | 0 | -2.185 | 9.86E-01 |
| MATN2_PPI          | NA      | NA      | NA      | NA      | NA | NA | NA | NA      | NA      | 0 | -2.191 | 9.86E-01 |
| LDLR_PPI           | NA      | NA      | NA      | NA      | NA | NA | NA | NA      | NA      | 0 | -2.201 | 9.86E-01 |
| APOA5_LIVER        | NA      | NA      | NA      | NA      | NA | NA | NA | NA      | NA      | 0 | -2.210 | 9.86E-01 |
| THADA_BRAIN        | NA      | NA      | NA      | NA      | NA | NA | NA | NA      | NA      | 0 | -2.210 | 9.86E-01 |
| F2_ADIPOSE         | NA      | NA      | NA      | NA      | NA | NA | NA | NA      | NA      | 0 | -2.212 | 9.87E-01 |
| ABCG5_ADIPOSE      | NA      | NA      | NA      | NA      | NA | NA | NA | NA      | NA      | 0 | -2.219 | 9.87E-01 |
| MMT00081256_MUSCLE | NA      | NA      | NA      | NA      | NA | NA | NA | NA      | NA      | 0 | -2.245 | 9.88E-01 |
| TGFBI_PPI          | NA      | NA      | NA      | NA      | NA | NA | NA | NA      | NA      | 0 | -2.263 | 9.88E-01 |
| SERPINC1_ADIPOSE   | NA      | NA      | NA      | NA      | NA | NA | NA | NA      | NA      | 0 | -2.285 | 9.89E-01 |
| NCOR2_KIDNEY       | NA      | NA      | NA      | NA      | NA | NA | NA | NA      | NA      | 0 | -2.373 | 9.91E-01 |
| PLG_ADIPOSE        | NA      | NA      | NA      | NA      | NA | NA | NA | NA      | NA      | 0 | -2.505 | 9.94E-01 |
| OSM_PPI            | NA      | NA      | NA      | NA      | NA | NA | NA | NA      | NA      | 0 | -2.534 | 9.94E-01 |
| HGD_BRAIN          | NA      | NA      | 1.7E-02 | 2.7E-01 | NA | NA | NA | NA      | NA      | 0 | -2.544 | 9.95E-01 |
| APOB_ADIPOSE       | NA      | NA      | NA      | NA      | NA | NA | NA | NA      | NA      | 0 | -2.554 | 9.95E-01 |
| APOC4_BRAIN        | NA      | NA      | NA      | NA      | NA | NA | NA | NA      | NA      | 0 | -2.598 | 9.95E-01 |
| M93275_BRAIN       | NA      | NA      | NA      | NA      | NA | NA | NA | NA      | NA      | 0 | -2.699 | 9.97E-01 |
| APOC3_BRAIN        | NA      | NA      | NA      | NA      | NA | NA | NA | NA      | NA      | 0 | -2.706 | 9.97E-01 |
| VPS33A_ADIPOSE     | NA      | NA      | NA      | NA      | NA | NA | NA | NA      | NA      | 0 | -2.731 | 9.97E-01 |
| APOA1_ADIPOSE      | NA      | NA      | NA      | NA      | NA | NA | NA | NA      | NA      | 0 | -2.744 | 9.97E-01 |
| MCOLN1_BRAIN       | 7.8E-01 | 9.8E-01 | 8.1E-01 | 9.5E-01 | NA | NA | NA | 9.7E-01 | 9.8E-01 | 0 | -2.884 | 9.98E-01 |
| APOA1_BRAIN        | NA      | NA      | NA      | NA      | NA | NA | NA | NA      | NA      | 0 | -3.125 | 9.99E-01 |

Note: The minimum and maximum sizes of the KD subnetworks in GSEA are set to 10 and 500 separately. The subnetworks out of the range in all the expression profiles are not shown here ("NA" represents that the subnetwork is out of range in the expression profiles). "P\_Values" represent the nominal p-value in GSEA, which estimates the statistical significance of a single subnetwork's enrichment score. "Dataset Consistency" represent the statistical consistency of the KD subnetworks in expression perturbation (FDR<0.05).

## Supplemental Table V. Functional annotations of KD subnetworks in Molecular Signatures Database (MSigDB).

| Subnetworks          | Subnet Size | Pathway Sources | Gene Category                                                                                     | P values in Fisher's Exact Test | Bonferroni corrected P values | Subnetwork Genes in the functional categories                                                                              |
|----------------------|-------------|-----------------|---------------------------------------------------------------------------------------------------|---------------------------------|-------------------------------|----------------------------------------------------------------------------------------------------------------------------|
| ABCG5_adipose        | 18          | REACTOME        | Abca transporters in lipid homeostasis                                                            | 1.60E-04                        | 2.10E-01                      | ABCG5;ABCG8                                                                                                                |
| ABCG5_adipose        | 18          | REACTOME        | Abc family proteins mediated transport                                                            | 5.80E-04                        | 7.80E-01                      | ABCG5;ABCG8                                                                                                                |
| ABCG5_liver          | 33          | REACTOME        | Metabolism of lipids and lipoproteins                                                             | 3.90E-04                        | 5.20E-01                      | CHKA;SREBF1;ABCG8;SQLE;SPHK2;ABCG5                                                                                         |
| ABCG5_liver          | 33          | REACTOME        | Abca transporters in lipid homeostasis                                                            | 6.70E-04                        | 8.90E-01                      | ABCG8;ABCG5                                                                                                                |
| ABCG8_liver          | 30          | REACTOME        | Abca transporters in lipid homeostasis                                                            | 5.40E-04                        | 7.20E-01                      | ABCG8;ABCG5                                                                                                                |
| ABCG8_liver          | 30          | REACTOME        | Abc family proteins mediated transport                                                            | 2.00E-03                        | 1.00E+00                      | ABCG8;ABCG5                                                                                                                |
| ACCN1_islet          | 13          | REACTOME        | Abca transporters in lipid homeostasis                                                            | 5.40E-04                        | 7.20E-01                      | ABCG8;ABCG5                                                                                                                |
| ACCN1_islet          | 13          | REACTOME        | Abc family proteins mediated transport                                                            | 2.00E-03                        | 1.00E+00                      | ABCG8;ABCG5                                                                                                                |
| ACCN1_islet          | 13          | REACTOME        | ABCA transporters in lihomeostasis                                                                | 7.20E-01                        | 5.40E-04                      | ABCG8;ABCG5                                                                                                                |
| ACVR1C_brain         | 37          | REACTOME        | Glutamate neurotransmitter release cycle                                                          | 1.90E-04                        | 2.50E-01                      | GLS;SLC17A7                                                                                                                |
| ACVR1C_brain         | 37          | REACTOME        | Neurotransmitter release cycle                                                                    | 1.00E-03                        | 1.00E+00                      | GLS;SLC17A7                                                                                                                |
| ADAM9_aorta          | 93          | NABA            | Core matrisome                                                                                    | 7.60E-08                        | 5.70E-11                      | POSTN;COL15A1;COL16A1;COMP;VCAN;AEBP1;FBN1;NI<br>D2;FN1;IGFBP3;IGFBP6;LAMA4;LAMB2;LUM;MGP;ASPN                             |
| ADAM9_aorta          | 93          | PID             | Integrin3 pathway                                                                                 | 2.40E-05                        | 1.80E-08                      | FBN1;FN1;KDR;LAMA4;PDGFRB;PLAU;PLAUR                                                                                       |
| ADM_artery           | 89          | PID             | ATF2 pathway                                                                                      | 3.60E-04                        | 2.70E-07                      | GADD45A;DUSP1;DUSP5;IL6;JUNB;ATF3;PLAU                                                                                     |
| ADM_artery           | 89          | PID             | AP1 pathway                                                                                       | 1.20E-03                        | 8.80E-07                      | DUSP1;FOSL2;CYR61;IL6;JUNB;ATF3;PLAU                                                                                       |
| ADM_smooth_muscle    | 41          | PID             | HIF1 tf pathway                                                                                   | 9.90E-02                        | 7.40E-05                      | ADM;HMOX1;BHLHE40;NDRG1                                                                                                    |
| AK007927_muscle      | 16          | REACTOME        | Organic cation anion zwitterion transport                                                         | 3.80E-05                        | 5.10E-02                      | SLC22A4;SLC22A5                                                                                                            |
| AK007927_muscle      | 16          | REACTOME        | Transport of glucose and other sugars bile salts and organic acids metal ions and amine compounds | 1.90E-03                        | 1.00E+00                      | SLC22A4;SLC22A5                                                                                                            |
| AK007927_muscle      | 16          | REACTOME        | Organic cation anion zwitterion transport                                                         | 5.10E-02                        | 3.80E-05                      | SLC22A4;SLC22A5                                                                                                            |
| AK021074_kidney      | 11          | BIOCARTA        | Myosin pathway                                                                                    | 3.30E-05                        | 4.40E-02                      | GNA13;PRKCA                                                                                                                |
| AK021074_kidney      | 11          | BIOCARTA        | Par1 pathway                                                                                      | 4.70E-05                        | 6.20E-02                      | GNA13;PRKCA                                                                                                                |
| AK021074_kidney      | 11          | BIOCARTA        | Myosin pathway                                                                                    | 4.40E-02                        | 3.30E-05                      | GNA13;PRKCA                                                                                                                |
| ALDOB_muscle         | 30          | KEGG            | Ppar signaling pathway                                                                            | 1.30E-05                        | 1.70E-02                      | SLC27A5;FABP1;APOA5;APOC3                                                                                                  |
| ALDOB_muscle         | 30          | PID             | Hnf3bpathway                                                                                      | 1.20E-04                        | 1.60E-01                      | ALDOB;F2;TTR                                                                                                               |
| ANXA1_artery         | 34          | BIOCARTA        | Platelet APP pathway                                                                              | 9.50E-03                        | 7.10E-06                      | PLAT;PLAU;COL4A2                                                                                                           |
| ANXA1_artery         | 34          | REACTOME        | Hemostasis                                                                                        | 3.00E-01                        | 2.30E-04                      | IRF1;ATP1B3;PLAT;PLAU;TIMP1;CAV1;F3                                                                                        |
| ANXA1_smooth_muscle  | 59          | PID             | IL6 7pathway                                                                                      | 3.10E-03                        | 2.30E-06                      | IRF1;JUNB;MCL1;TIMP1;CEBPD                                                                                                 |
| ANXA1_smooth_muscle  | 59          | PID             | AP1 pathway                                                                                       | 2.20E-02                        | 1.70E-05                      | HIF1A;JUNB;MAF;TIMP1;DUSP1                                                                                                 |
| ANXA2_cardiac_muscle | 233         | REACTOME        | Response to elevated platelet cytosolic ca2                                                       | 3.40E-07                        | 2.60E-10                      | SERPINE1;PFN1;SERPINA1;PSAP;STX4;THBS1;TIMP1;V<br>CL;CALM1;CALU;CD9;CD63;WDR1;ALDOA;FN1                                    |
| ANXA2_cardiac_muscle | 233         | REACTOME        | Platelet activation signaling and aggregation                                                     | 1.70E-06                        | 1.20E-09                      | ITPR3;RHOA;LYN;SERPINE1;PFN1;SERPINA1;PSAP;SHC<br>1;STX4;THBS1;TIMP1;VCL;YWHAZ;CALM1;CALU;CD9;CD<br>63;WDR1;ALDOA;FN1;GRB2 |
| ANXA2_PPI            | 22          | BIOCARTA        | Srcrtp pathway                                                                                    | 2.00E-09                        | 2.60E-06                      | PRKCB;PRKCA;SRC;GRB2                                                                                                       |
| ANXA2_PPI            | 22          | BIOCARTA        | Cbl pathway                                                                                       | 4.30E-09                        | 5.70E-06                      | PRKCB;PRKCA;SRC;GRB2                                                                                                       |
| ANXA3_liver          | 49          | NABA            | Matrisome associated                                                                              | 5.90E-04                        | 7.80E-01                      | LGALS3;SERPINB6;CXCL6;ANXA3;PLAU;PLXDC2;CTSS;<br>SLPI                                                                      |
| ANXA3_liver          | 49          | NABA            | ECM regulators                                                                                    | 3.60E-03                        | 1.00E+00                      | SERPINE1;PFN1;SERPINA1;PSAP;STX4;THBS1;TIMP1;V<br>CL;CALM1;CALU;CD9;CD63;WDR1;ALDOA;FN1                                    |
| ANXA3_liver          | 49          | NABA            | Matrisome associated                                                                              | 7.80E-01                        | 5.90E-04                      | CXCL6;PLAU;PLXDC2;SERPINB6;SLPI;ANXA3;CTSS;LGA<br>LS3                                                                      |
| APOA1_adipose        | 32          | PID             | Hnf3bpathway                                                                                      | 5.50E-08                        | 7.30E-05                      | TAT;ALB;F2;APOA1;TTR                                                                                                       |
| APOA1_adipose        | 32          | BIOCARTA        | Ami pathway                                                                                       | 1.20E-07                        | 1.50E-04                      | FGA;PLG;SERPINC1;F2                                                                                                        |
| APOA1_brain          | 30          | REACTOME        | Hdl mediated lipid transport                                                                      | 2.60E-04                        | 3.40E-01                      | APOA1;APOC3                                                                                                                |
| APOA1_brain          | 30          | REACTOME        | Chylomicron mediated lipid transport                                                              | 2.90E-04                        | 3.90E-01                      | APOA1;APOC3                                                                                                                |
| APOA1_muscle         | 16          | KEGG            | Complement and coagulation cascades                                                               | 1.30E-10                        | 1.70E-07                      | FGG;C4BPA;SERPIND1;C8G;F2;KNG1                                                                                             |
| APOA1_muscle         | 16          | BIOCARTA        | Intrinsic pathway                                                                                 | 2.90E-06                        | 3.90E-03                      | FGG;F2;KNG1                                                                                                                |
| APOA5_brain          | 32          | REACTOME        | Gamma carboxylation transport and amino terminal cleavage of proteins                             | 1.40E-03                        | 1.00E-06                      | PROC;PROZ;F10                                                                                                              |
| APOA5_liver          | 23          | KEGG            | Beta alanine metabolism                                                                           | 2.40E-04                        | 3.20E-01                      | MLYCD;ALDH2                                                                                                                |
| APOA5_liver          | 23          | KEGG            | Propanoate metabolism                                                                             | 5.50E-04                        | 7.30E-01                      | MLYCD;ALDH2                                                                                                                |

|                    |     |          |                                                                      |          |          |                                                                                                                                                                                                                                                                    |
|--------------------|-----|----------|----------------------------------------------------------------------|----------|----------|--------------------------------------------------------------------------------------------------------------------------------------------------------------------------------------------------------------------------------------------------------------------|
| APOA5_liver        | 23  | KEGG     | Beta alanine metabolism                                              | 3.20E-01 | 2.40E-04 | ALDH2;MLYCD                                                                                                                                                                                                                                                        |
| APOB_adipose       | 27  | REACTOME | Synthesis of bile acids and bile salts via 7alpha hydroxycholesterol | 1.30E-06 | 1.70E-03 | AKR1D1;CYP8B1;BAAT                                                                                                                                                                                                                                                 |
| APOB_adipose       | 27  | KEGG     | Primary bile acid biosynthesis                                       | 1.50E-06 | 2.00E-03 | AKR1D1;CYP8B1;BAAT                                                                                                                                                                                                                                                 |
| APOB_PPI           | 18  | REACTOME | Chylomicron mediated lipid transport                                 | 6.70E-11 | 8.90E-08 | APOA1;MTTP;LDLR;LIPC;APOB                                                                                                                                                                                                                                          |
| APOB_PPI           | 18  | REACTOME | Lipoprotein metabolism                                               | 1.50E-09 | 2.00E-06 | APOA1;MTTP;LDLR;LIPC;APOB                                                                                                                                                                                                                                          |
| APOC2_muscle       | 27  | REACTOME | Lidigestion mobilization and transport                               | 7.10E-07 | 9.50E-04 | APOC2;APOA5;APOC3;ABCG5                                                                                                                                                                                                                                            |
| APOC2_muscle       | 27  | REACTOME | Chylomicron mediated lipid transport                                 | 1.90E-06 | 2.60E-03 | APOC2;APOA5;APOC3                                                                                                                                                                                                                                                  |
| APOC3_brain        | 19  | REACTOME | Chylomicron mediated lipid transport                                 | 5.10E-07 | 6.80E-04 | APOA1;APOA5;APOC3                                                                                                                                                                                                                                                  |
| APOC3_brain        | 19  | REACTOME | Lipoprotein metabolism                                               | 3.00E-06 | 4.00E-03 | APOA1;APOA5;APOC3                                                                                                                                                                                                                                                  |
| APOC4_brain        | 25  | KEGG     | Complement and coagulation cascades                                  | 1.30E-05 | 1.70E-02 | CFI;KNG1;MBL2;C3                                                                                                                                                                                                                                                   |
| APOC4_brain        | 25  | REACTOME | Complement cascade                                                   | 4.20E-05 | 5.50E-02 | CFI;MBL2;C3                                                                                                                                                                                                                                                        |
| APOF_muscle        | 45  | KEGG     | Complement and coagulation cascades                                  | 5.50E-09 | 7.30E-06 | PLG;SERPINC1;F13B;CFI;MASP1;C5;FGB                                                                                                                                                                                                                                 |
| APOF_muscle        | 45  | REACTOME | Lipoprotein metabolism                                               | 5.40E-08 | 7.20E-05 | ALB;APOC2;APOA5;LIPC;APOB                                                                                                                                                                                                                                          |
| AW475929_brain     | 30  | REACTOME | Striated muscle contraction                                          | 4.50E-04 | 5.90E-01 | MYL4;TCAP                                                                                                                                                                                                                                                          |
| AW475929_brain     | 30  | REACTOME | Muscle contraction                                                   | 1.40E-03 | 1.00E+00 | MYL4;TCAP                                                                                                                                                                                                                                                          |
| AZGP1_adipose      | 23  | KEGG     | Complement and coagulation cascades                                  | 1.40E-04 | 1.80E-01 | PLG;KNG1;C9                                                                                                                                                                                                                                                        |
| AZGP1_adipose      | 23  | REACTOME | Lidigestion mobilization and transport                               | 2.10E-03 | 1.00E+00 | APOA5;ABCG5                                                                                                                                                                                                                                                        |
| BATF2_blood        | 12  | REACTOME | Interferon signaling                                                 | 7.70E-08 | 1.00E-04 | GBP1;UBE2L6;GBP5;IRF1;IRF9                                                                                                                                                                                                                                         |
| BATF2_blood        | 12  | REACTOME | Interferon gamma signaling                                           | 1.40E-07 | 1.80E-04 | GBP1;GBP5;IRF1;IRF9                                                                                                                                                                                                                                                |
| BNIP3L_aorta       | 53  | NABA     | Core matrisome                                                       | 5.30E-02 | 4.00E-05 | SPARC;THBS1;COL16A1;COMP;VCAN;FBLN2;NID2;MXR A5                                                                                                                                                                                                                    |
| BNIP3L_aorta       | 53  | REACTOME | Class A1 rhodopsin like receptors                                    | 1.10E-01 | 8.20E-05 | C3;S1PR1;EDN1;CXCL1;ANXA1;PTGDR;CCL20;CCL21                                                                                                                                                                                                                        |
| BST2_artery        | 33  | REACTOME | Interferon signaling                                                 | 4.00E-11 | 3.00E-14 | IFITM1;UBE2L6;ISG15;ADAR;IRF9;IFITM3;HLA-B;HLA-C;IFI27;IFI3;MX2;STAT1                                                                                                                                                                                              |
| C1R_cardiac_muscle | 111 | PID      | Integrin1 pathway                                                    | 1.40E-05 | 1.00E-08 | CD81;COL5A1;COL6A2;ITGA3;LAMA2;LAMA4;MDK;TGFB1;THBS1                                                                                                                                                                                                               |
| CCL18_aorta        | 214 | REACTOME | Immune system                                                        | 3.50E-07 | 2.60E-10 | SELL;STAT5A;TAP1;TYROBP;UBA7;CANX;IFITM1;PSTPI P1;UBE2L6;CD14;ISG15;CD74;CD79A;IFITM3;CNPY3;CT SC;CISH;CTSBC;CYBA;EGR1;LY96;FYB;FYN;GBP2;HLA-DRB1;HLA-F;HLA-G;BIRC3;IFI27;IFNGR1;IL2RB;ITGB7;JUN;MYD88;NFKB2;NFKBIA;HERC5;B2M;PSMB8;PSMB9;PSMD7;PSME1;PTP N6;PTPRC |
| CCL18_aorta        | 214 | REACTOME | Cytokine signaling in immune system                                  | 1.50E-06 | 1.10E-09 | STAT5A;UBA7;IFITM1;UBE2L6;ISG15;IFITM3;CISH;EGR1; FYN;GBP2;HLA-DRB1;HLA-F;HLA-G;IFI27;IFNGR1;IL2RB;MYD88;NFKB2;HERC5;B2M;PSMB 8;PTPN6                                                                                                                              |
| CD14_adipose       | 48  | REACTOME | Antigen processing cross presentation                                | 1.00E+00 | 1.20E-03 | MRC1;NCF4;PSMA8                                                                                                                                                                                                                                                    |
| CD74_adipose       | 17  | KEGG     | Antigen processing and presentation                                  | <1.0E-16 | <1.0E-16 | HLA-DQB1;HLA-DRA;HLA-DMA;HLA-DRB1;CIITA;HLA-F;HLA-C;HLA-DQA1;HLA-DOA;HLA-DMB;CD74                                                                                                                                                                                  |
| CD74_adipose       | 17  | KEGG     | Type i diabetes mellitus                                             | <1.0E-16 | <1.0E-16 | HLA-DQB1;HLA-DRA;HLA-DMA;HLA-DRB1;HLA-F;HLA-C;HLA-DQA1;HLA-DOA;HLA-DMB                                                                                                                                                                                             |
| CFB_brain          | 20  | KEGG     | Complement and coagulation cascades                                  | 4.00E-10 | 5.40E-07 | CFB;C4B;PLG;CFI;F10;C3                                                                                                                                                                                                                                             |
| CFB_brain          | 20  | REACTOME | Regulation of complement cascade                                     | 1.00E-06 | 1.30E-03 | CFB;CFI;C3                                                                                                                                                                                                                                                         |
| CFB_brain          | 20  | KEGG     | Complement and coagulation cascades                                  | 5.40E-07 | 4.00E-10 | CFB;C3;C4B;CFI;F10;PLG                                                                                                                                                                                                                                             |
| CFD_aorta          | 166 | KEGG     | Complement and coagulation cascades                                  | 1.20E-06 | 9.20E-10 | CFD;F3;F13A1;CFI;SERPING1;C1R;C1S;C3;C3AR1;C4BP A;C5AR1                                                                                                                                                                                                            |
| CFD_aorta          | 166 | REACTOME | Degradation of the extracellular matrix                              | 3.90E-02 | 2.90E-05 | MMP2;MMP7;TIMP1;TPSAB1;CMA1                                                                                                                                                                                                                                        |
| CKLF_liver         | 26  | KEGG     | Complement and coagulation cascades                                  | 4.00E-10 | 5.40E-07 | CFB;C4B;PLG;CFI;F10;C3                                                                                                                                                                                                                                             |
| CKLF_liver         | 26  | REACTOME | Regulation of complement cascade                                     | 1.00E-06 | 1.30E-03 | CFB;CFI;C3                                                                                                                                                                                                                                                         |
| CKLF_liver         | 26  | KEGG     | Complement and coagulation cascades                                  | 1.20E-06 | 9.20E-10 | CFD;F3;F13A1;CFI;SERPING1;C1R;C1S;C3;C3AR1;C4BP A;C5AR1                                                                                                                                                                                                            |
| COASY_muscle       | 26  | KEGG     | Peroxisome                                                           | 2.50E-04 | 3.30E-01 | HACL1;EHADH;EPHX2                                                                                                                                                                                                                                                  |
| COASY_muscle       | 26  | BIOCARTA | Ptdins pathway                                                       | 6.10E-04 | 8.20E-01 | PFKL;PFKP                                                                                                                                                                                                                                                          |
| COL1A1_liver       | 73  | REACTOME | Extracellular Matrix                                                 | <1.0E-16 | <1.0E-16 | COL5A1;COL1A2;COL3A1;COL4A1;COL6A3;COL4A2;COL 1A1;ADAMTS2;COL8A1;COL16A1;SERPINH1;COL6A1;PC OLCE;PLOD2                                                                                                                                                             |
| COL1A1_liver       | 73  | REACTOME | Collagen formation                                                   | <1.0E-16 | <1.0E-16 | COL5A1;COL1A2;COL3A1;COL4A1;COL6A3;COL4A2;COL 1A1;ADAMTS2;COL8A1;COL16A1;SERPINH1;COL6A1;PC OLCE;PLOD2                                                                                                                                                             |
| COL4A2_muscle      | 28  | NABA     | Collagens                                                            | 9.90E-11 | 1.30E-07 | COL5A1;COL4A1;COL5A3;COL4A2;COL6A2;COL15A1                                                                                                                                                                                                                         |
| COL4A2_muscle      | 28  | REACTOME | Collagen formation                                                   | 5.60E-10 | 7.40E-07 | COL5A1;COL4A1;COL5A3;COL4A2;COL6A2;COL15A1                                                                                                                                                                                                                         |
| COL4A2_PPI         | 19  | NABA     | Extracellular Matrix                                                 | 1.80E-07 | 2.40E-04 | BGN;COL4A1;COL4A2;MATN2;FBLN2;FN1;TGFB1                                                                                                                                                                                                                            |
| COL4A2_PPI         | 19  | BIOCARTA | Plateletapp pathway                                                  | 1.50E-06 | 2.00E-03 | COL4A1;COL4A2;APP                                                                                                                                                                                                                                                  |
| COL5A1_adipose     | 29  | REACTOME | Extracellular Matrix                                                 | <1.0E-16 | <1.0E-16 | COL16A1;COL5A1;COL1A2;COL3A1;COL4A1;COL6A3;SE RPINH1;COL5A3;COL4A2;COL5A2;COL15A1;ADAMTS2;C OL6A2                                                                                                                                                                  |
| COL5A1_adipose     | 29  | REACTOME | Collagen formation                                                   | <1.0E-16 | <1.0E-16 | COL16A1;COL5A1;COL1A2;COL3A1;COL4A1;COL6A3;SE RPINH1;COL5A3;COL4A2;COL5A2;COL15A1;ADAMTS2;C OL6A2                                                                                                                                                                  |
| COL5A1_adipose     | 29  | REACTOME | Extracellular matrix organization                                    | 0.00E+00 | 0.00E+00 | COL5A1;ADAMTS2;COL15A1;COL16A1;COL4A1;COL5A2; COL5A3;COL6A3;SERPINH1;COL1A2;COL3A1;COL4A2;C OL6A2                                                                                                                                                                  |
| COL6A3_liver       | 69  | REACTOME | Collagen formation                                                   | <1.0E-16 | <1.0E-16 | COL1A2;COL3A1;COL4A1;COL6A3;COL4A2;COL1A1;ADA MTS2;COL8A1;COL14A1;SERPINH1;COL6A1;PCOLCE                                                                                                                                                                           |
| COL6A3_liver       | 69  | NABA     | Extracellular Matrix                                                 | <1.0E-16 | <1.0E-16 | COL1A2;DCN;COL3A1;COL4A1;FBLN7;COL6A3;DPT;LAM A2;COL4A2;COL1A1;WISP1;MATN2;COL8A1;NID1;SVEP1 ;LG12;LTBP4;COL14A1;FBN1;CRISPLD2;COL6A1;PCOLC E;TGFB1;SMOC2;THBS2                                                                                                    |
| COL6A3_liver       | 69  | REACTOME | Collagen formation                                                   | 0.00E+00 | 0.00E+00 | COL6A3;ADAMTS2;COL14A1;COL1A1;COL1A2;COL3A1; COL4A1;COL4A2;COL6A1;COL8A1;PCOLCE;SERPINH1 FN1;FNDC1;IGSF10;SVEP1                                                                                                                                                    |
| COLEC12_kidney     | 17  | NABA     | Core matrisome                                                       | 1.90E-01 | 1.40E-04 | DVL1;BTRC;LEF1;CHD8;TCF7L1;EP300;AXIN1;TBL1X;PS EN1;APC;SMAD4;SMAD2;CREBBP;DVL3;TCF7L2;CSNK1 A1;CSNK2A1;CTNNBIP1;GSK3B;RUVBL1;SMAD3;CSNK2 B;CTNNB1;SOX17;APC2;AXIN2;CCND1                                                                                          |
| CTNNB1_PPI         | 135 | KEGG     | Wnt signaling pathway                                                | <1.0E-16 | <1.0E-16 | CDH1;IQGAP1;LEF1;TCF7L1;EP300;SMAD4;TGFB2;SM AD2;PTPN1;ACPI;FYN;MET;CREBBP;PTPRM;TCF7L2;CT NNA1;CSNK2A1;CTNNA3;FER;PTPRJ;SMAD3;CSNK2B;P TPN6;CTNNB1;PTPRF;EGFR;TGFB1;SRC;ERBB2                                                                                     |
| CTNNB1_PPI         | 135 | KEGG     | Adherens junction                                                    | <1.0E-16 | <1.0E-16 | CTNNB1;APC;CHD8;GSK3B;BTRC;SMAD4;SOX17;AXIN1; LEF1;TBL1X;CSNK1A1;PSEN1;SMAD2;CSNK2A1;CSNK2 B;CTNNBIP1;DVL3;SMAD3;CCND1;CREBBP;RUVBL1;TC F7L2;APC2;AXIN2;DVL1;EP300;TCF7L1                                                                                          |
| CTNNB1_PPI         | 135 | KEGG     | WNT signaling pathway                                                | 0.00E+00 | 0.00E+00 | CTNNB1;APC;CHD8;GSK3B;BTRC;SMAD4;SOX17;AXIN1; LEF1;TBL1X;CSNK1A1;PSEN1;SMAD2;CSNK2A1;CSNK2 B;CTNNBIP1;DVL3;SMAD3;CCND1;CREBBP;RUVBL1;TC F7L2;APC2;AXIN2;DVL1;EP300;TCF7L1                                                                                          |
| CTSB_smooth_muscle | 42  | NABA     | ECM regulators                                                       | 2.30E-01 | 1.70E-04 | CTSB;CTSD;CTSH;PLAU;CST3;CSTB                                                                                                                                                                                                                                      |
| CXCL10_liver       | 46  | REACTOME | Chemokine receptors bind chemokines                                  | 4.40E-16 | 5.90E-13 | XCL1;CXCL10;CCL2;CCL3L1;CCL7;CCL5;CCL3L3;CXCL1 1;CXCL9;CCL4                                                                                                                                                                                                        |
| CXCL10_liver       | 46  | KEGG     | Chemokine signaling pathway                                          | 3.40E-12 | 4.50E-09 | XCL1;CXCL10;CCL2;CCL3L1;CCL7;CCL5;CCL3L3;CXCL1 1;STAT1;CXCL9;CCL4                                                                                                                                                                                                  |



|                            |     |          |                                                                                                             |          |          |                                                                                                                                                                |
|----------------------------|-----|----------|-------------------------------------------------------------------------------------------------------------|----------|----------|----------------------------------------------------------------------------------------------------------------------------------------------------------------|
| CXCL12_adipose             | 47  | REACTOME | Adenylate cyclase activating pathway                                                                        | 3.40E-04 | 4.50E-01 | ADCY1;ADCY5                                                                                                                                                    |
| CXCL12_adipose             | 47  | REACTOME | Adenylate cyclase inhibitory pathway                                                                        | 5.90E-04 | 7.80E-01 | ADCY1;ADCY5                                                                                                                                                    |
| CXCL12_cardiac_muscle      | 41  | PID      | Syndecan 4 pathway                                                                                          | 1.60E-01 | 1.20E-04 | CXCL12;FZD7;FGFR1                                                                                                                                              |
| CXCL12_cardiac_muscle      | 41  | KEGG     | Viral myocarditis                                                                                           | 1.00E+00 | 1.40E-03 | FYN;HLA-B;LAMA2                                                                                                                                                |
| CXCL12_liver               | 30  | KEGG     | Intestinal immune network for iga production                                                                | 3.00E-03 | 1.00E+00 | CXCL12;HLA-DOA                                                                                                                                                 |
| CXCL12_liver               | 30  | REACTOME | Amino acid and oligopeptide slc transporters                                                                | 3.20E-03 | 1.00E+00 | SLC1A1;SLC6A6                                                                                                                                                  |
| CYP1B1_brain               | 49  | NABA     | Core matrisome                                                                                              | 7.00E-03 | 5.20E-06 | DCN;ELN;EMILIN2;ESM1;BGN;CTGF;FMOD;LUM                                                                                                                         |
| DPYD_cardiac_muscle        | 35  | REACTOME | Regulation of insulin like growth factor IGF activity by insulin like growth factor binding proteins igfbps | 2.20E-02 | 1.70E-05 | IGFBP3;IGFBP4;IGFBP6                                                                                                                                           |
| DUSP1_aorta                | 179 | NABA     | Core matrisome                                                                                              | 9.90E-07 | 7.40E-10 | NID2;FMOD;FN1;MXRA5;CYR61;LAMA4;MATN2;MFGE8;NID1;CRIM1;ASPN;PRELP;SPARC;COL21A1;SRPX;WISP2;POSTN;COL6A3;COL15A1;CTGF;DPT                                       |
| DUSP1_aorta                | 179 | NABA     | ECM glycoproteins                                                                                           | 3.10E-04 | 2.30E-07 | NID2;FN1;MXRA5;CYR61;LAMA4;MATN2;MFGE8;NID1;CRIM1;SPARC;SRPX;WISP2;POSTN;CTGF;DPT                                                                              |
| DUSP1_artery               | 71  | PID      | Integrin1 pathway                                                                                           | 6.20E-02 | 4.60E-05 | FN1;ITGA5;LAMC1;NID1;THBS1                                                                                                                                     |
| DUSP1_smooth_muscle        | 63  | PID      | HIF1 tf pathway                                                                                             | 1.60E-03 | 1.20E-06 | HMOX1;JUN;MCL1;SERPINE1;BHLHE40;ADM                                                                                                                            |
| DUSP1_smooth_muscle        | 63  | PID      | FRA pathway                                                                                                 | 1.80E-03 | 1.30E-06 | FOSL2;HMOX1;JUN;JUNB;PLAUR                                                                                                                                     |
| DUSP6_aorta                | 253 | PID      | FRA pathway                                                                                                 | 4.40E-06 | 3.30E-09 | IL6;JUNB;LIF;MGP;MMP1;MMP2;PLAUR;CCL2;THBD;FOSL1                                                                                                               |
| DUSP6_artery               | 50  | PID      | IL6 7pathway                                                                                                | 1.00E-04 | 7.70E-08 | FOXO1;JUN;JUNB;MCL1;TIMP1;CEBPD                                                                                                                                |
| DUSP6_artery               | 50  | PID      | Syndecan 4 pathway                                                                                          | 2.00E-02 | 1.50E-05 | FGFR1;SDCBP;TFPI;THBS1                                                                                                                                         |
| DUSP6_cardiac_muscle       | 108 | PID      | AP1 pathway                                                                                                 | 5.10E-03 | 3.90E-06 | CYR61;JUN;JUNB;BAG1;TCF7L2;TIMP1;DUSP1                                                                                                                         |
| DUSP6_cardiac_muscle       | 108 | PID      | IL6 7pathway                                                                                                | 1.00E-01 | 7.50E-05 | FOXO1;JUN;JUNB;TIMP1;CEBPD                                                                                                                                     |
| DUSP6_smooth_muscle        | 17  | REACTOME | MAPK targets nuclear events mediated by map kinases                                                         | 8.90E-03 | 6.70E-06 | DUSP6;JUN;DUSP4                                                                                                                                                |
| DUSP6_smooth_muscle        | 17  | PID      | ERBB1 downstream pathway                                                                                    | 9.80E-03 | 7.30E-06 | DUSP6;EGR1;JUN;ZFP36                                                                                                                                           |
| DUSP6_vascular_endothelium | 122 | PID      | Il6 7pathway                                                                                                | 2.90E-06 | 2.20E-09 | FOXO1;FOS;IL6ST;JUN;JUNB;MCL1;PTPRE;TIMP1;CEBPD                                                                                                                |
| EFEMP1_cardiac_muscle      | 63  | NABA     | Core matrisome                                                                                              | 2.60E-06 | 1.90E-09 | EFEMP1;EFEMP2;IGFBP3;CYR61;L1;TBP2;LUM;THBS1;SRPX;SLIT2;COL3A1;COL4A2;ECM2;FBLN2                                                                               |
| EFEMP1_cardiac_muscle      | 63  | NABA     | ECM glycoproteins                                                                                           | 1.20E-04 | 9.00E-08 | EFEMP1;EFEMP2;IGFBP3;CYR61;L1;TBP2;THBS1;SRPX;SLIT2;ECM2;FBLN2                                                                                                 |
| F2_adipose                 | 49  | KEGG     | Complement and coagulation cascades                                                                         | 5.40E-13 | 7.20E-10 | FGG;PLG;SERPINC1;SERPIND1;KNG1;MASP2;MBL2;F2;PROC                                                                                                              |
| F2_adipose                 | 49  | BIOCARTA | Ami pathway                                                                                                 | 3.90E-09 | 5.10E-06 | FGG;PLG;SERPINC1;F2;PROC                                                                                                                                       |
| F2_adipose                 | 49  | KEGG     | Complement and coagulation cascades                                                                         | 7.20E-10 | 5.40E-13 | F2;FGG;KNG1;MASP2;MBL2;PROC;SERPINC1;SERPIND1;PLG                                                                                                              |
| F2_muscle                  | 47  | KEGG     | Complement and coagulation cascades                                                                         | 1.40E-12 | 1.90E-09 | FGG;PLG;SERPIND1;F2;CFI;F9;MBL2;KLKB1;FGB                                                                                                                      |
| F2_muscle                  | 47  | BIOCARTA | Intrinsic pathway                                                                                           | 1.40E-08 | 1.80E-05 | FGG;F2;F9;KLKB1;FGB                                                                                                                                            |
| FBLN2_PPI                  | 22  | PID      | Integrin1 pathway                                                                                           | <1.0E-16 | <1.0E-16 | COL4A6;LAMA5;COL4A1;COL4A3;COL18A1;NID1;LAMA1;COL4A5;COL4A4;FN1;FBN1;LAMC2                                                                                     |
| FBLN2_PPI                  | 22  | NABA     | Extracellular Matrix                                                                                        | <1.0E-16 | <1.0E-16 | COL4A6;BCAN;HSPG2;LAMA5;COL4A1;VCAN;PRELP;COL4A2;COL4A3;COL18A1;NID1;LAMA1;COL4A5;COL4A4;ACAN;FBLN2;FN1;FBN1;ELN;LAMC2                                         |
| FBP1_muscle                | 23  | REACTOME | Hdl mediated lipid transport                                                                                | 1.90E-06 | 2.60E-03 | ALB;APOC3;LCAT                                                                                                                                                 |
| FBP1_muscle                | 23  | REACTOME | Lipoprotein metabolism                                                                                      | 1.40E-05 | 1.80E-02 | ALB;APOC3;LCAT                                                                                                                                                 |
| FN1_kidney                 | 16  | PID      | Integrin5 pathway                                                                                           | 1.40E-04 | 1.90E-01 | FN1;FBN1                                                                                                                                                       |
| FN1_kidney                 | 16  | NABA     | Extracellular Matrix                                                                                        | 1.40E-04 | 1.90E-01 | WISP1;COL14A1;FN1;FBN1                                                                                                                                         |
| FN1_PPI                    | 75  | KEGG     | Focal adhesion                                                                                              | <1.0E-16 | <1.0E-16 | COL4A6;ITGA3;ITGA5;COL1A2;COL4A1;ITGA8;COL4A2;COL1A1;HGF;COL2A1;COL6A2;COL4A4;TNC;ITGB3;COMP;FN1;THBS1;ITGB1;ITGB6;ITGB7;ITGA4                                 |
| FN1_PPI                    | 75  | KEGG     | ECM receptor interaction                                                                                    | <1.0E-16 | <1.0E-16 | COL4A6;ITGA3;ITGA5;COL1A2;COL4A1;ITGA8;COL4A2;COL1A1;COL2A1;COL6A2;COL4A4;TNC;ITGB3;COMP;FN1;THBS1;ITGB1;ITGB6;SDC2;ITGB7;ITGA4                                |
| GBP1_adipose               | 25  | REACTOME | Interferon gamma signaling                                                                                  | 3.60E-08 | 4.80E-05 | GBP2;GBP1;GBP4;STAT1;GBP5                                                                                                                                      |
| GBP1_adipose               | 25  | REACTOME | Interferon signaling                                                                                        | 3.80E-06 | 5.00E-03 | GBP2;GBP1;GBP4;STAT1;GBP5                                                                                                                                      |
| GBP1_blood                 | 18  | REACTOME | Interferon signaling                                                                                        | 3.40E-07 | 4.50E-04 | GBP1;GBP4;UBE2L6;STAT1;GBP5                                                                                                                                    |
| GBP1_blood                 | 18  | REACTOME | Interferon gamma signaling                                                                                  | 4.00E-07 | 5.40E-04 | GBP1;GBP4;STAT1;GBP5                                                                                                                                           |
| GBP1_vascular_endothelium  | 92  | REACTOME | Interferon alpha beta signaling                                                                             | 0.00E+00 | 0.00E+00 | GBP2;HLA-A;HLA-B;HLA-C;HLA-F;HLA-G;IFI27;IFI35;IFIT1;IFIT3;IRF1;ISG20;MX1;OAS1;OAS2;STAT1;IFITM1;ISG15;ADAR;IRF9                                               |
| GBP1_vascular_endothelium  | 92  | REACTOME | Interferon signaling                                                                                        | 0.00E+00 | 0.00E+00 | GBP1;GBP2;HLA-A;HLA-B;HLA-C;HLA-F;HLA-G;IFI27;IFI35;IFIT1;IFIT3;IRF1;ISG20;MX1;OAS1;OAS2;B2M;STAT1;IFITM1;UBE2L6;ISG15;ADAR;IRF9;DDX58                         |
| GBP2_blood                 | 20  | REACTOME | Interferon gamma signaling                                                                                  | 3.40E-06 | 4.50E-03 | FCGR1A;GBPs;GBP2;IRF1                                                                                                                                          |
| GBP2_blood                 | 20  | REACTOME | Interferon signaling                                                                                        | 5.40E-06 | 7.10E-03 | FCGR1A;UBE2L6;GBPs;GBP2;IRF1                                                                                                                                   |
| GBP2_kidney                | 12  | REACTOME | Interferon gamma signaling                                                                                  | 4.50E-04 | 6.00E-01 | GBP4;GBP2                                                                                                                                                      |
| GBP2_kidney                | 12  | REACTOME | Interferon signaling                                                                                        | 2.90E-03 | 1.00E+00 | GBP4;GBP2                                                                                                                                                      |
| GEM_kidney                 | 18  | PID      | Cmyb pathway                                                                                                | 8.40E-05 | 1.10E-01 | CEBPD;PTGS2;CEBPB                                                                                                                                              |
| GEM_kidney                 | 18  | PID      | P38alpha/etadownstreampathway                                                                               | 7.30E-04 | 9.70E-01 | PTGS2;CEBPB                                                                                                                                                    |
| HELZ_muscle                | 32  | PID      | Rb 1pathway                                                                                                 | 2.10E-03 | 1.00E+00 | SMARCA4;UBTF                                                                                                                                                   |
| HELZ_muscle                | 32  | KEGG     | Long term depression                                                                                        | 2.50E-03 | 1.00E+00 | PRKCA;RYR1                                                                                                                                                     |
| HELZ_muscle                | 32  | PID      | Rb 1 pathway                                                                                                | 1.00E+00 | 2.10E-03 | SMARCA4;UBTF                                                                                                                                                   |
| HEMGN_muscle               | 21  | REACTOME | Degradation of the extracellular matrix                                                                     | 7.30E-04 | 9.70E-01 | CTSG;MMP13                                                                                                                                                     |
| HEMGN_muscle               | 21  | REACTOME | Latent infection of homo sapiens with mycobacterium tuberculosis                                            | 9.50E-04 | 1.00E+00 | LTF;CAMP                                                                                                                                                       |
| HEMGN_muscle               | 21  | REACTOME | Degradation of the extracellular matrix                                                                     | 9.70E-01 | 7.30E-04 | MMP13;CTSG                                                                                                                                                     |
| HGD_brain                  | 40  | KEGG     | Ppar signaling pathway                                                                                      | 1.20E-06 | 1.60E-03 | APOA1;PCK1;APOA5;ACOX2;ACAA1                                                                                                                                   |
| HGD_brain                  | 40  | REACTOME | Synthesis of bile acids and bile salts via 7alpha hydroxycholesterol                                        | 8.90E-06 | 1.20E-02 | AKR1D1;ABCB11;ACOX2                                                                                                                                            |
| HGD_brain                  | 40  | KEGG     | PPAR signaling pathway                                                                                      | 1.60E-03 | 1.20E-06 | ACOX2;APOA5;PCK1;ACAA1;APOA1                                                                                                                                   |
| HGD_muscle                 | 48  | KEGG     | Complement and coagulation cascades                                                                         | 1.10E-07 | 1.50E-04 | FGG;PLG;SERPINC1;F13B;F9;MBL2                                                                                                                                  |
| HGD_muscle                 | 48  | REACTOME | Formation of fibrin clot clotting cascade                                                                   | 4.00E-06 | 5.30E-03 | FGG;SERPINC1;F13B;F9                                                                                                                                           |
| HGD_muscle                 | 48  | KEGG     | Complement and coagulation cascades                                                                         | 1.50E-04 | 1.10E-07 | F13B;F9;FGG;MBL2;PLG;SERPINC1                                                                                                                                  |
| HLA-F_artery               | 50  | REACTOME | Interferon gamma signaling                                                                                  | 0.00E+00 | 0.00E+00 | HLA-F;HLA-G;IFNGR1;OAS1;OAS2;B2M;STAT1;CD44;IRF9;HLA-A;HLA-B;HLA-C                                                                                             |
| HLA-F_artery               | 50  | REACTOME | Interferon alpha beta signaling                                                                             | 0.00E+00 | 0.00E+00 | HLA-F;HLA-G;IFI35;MX2;OAS1;OAS2;PSMB8;STAT1;IFITM1;ISG15;IRF9;HLA-A;HLA-B;HLA-C                                                                                |
| IFI30_smooth_muscle        | 17  | REACTOME | Interferon alpha beta signaling                                                                             | 3.60E-03 | 2.70E-06 | IFIT3;PSMB8;ISG15;IFITM3                                                                                                                                       |
| IFI30_smooth_muscle        | 17  | KEGG     | Antigen processing and presentation                                                                         | 1.40E-02 | 1.00E-05 | IFI30;HLA-DMA;LGMN;PSME1                                                                                                                                       |
| IFI35_artery               | 65  | REACTOME | Interferon signaling                                                                                        | 0.00E+00 | 0.00E+00 | IFI35;IFIT2;IFIT1;IFIT3;IRF1;MX1;MX2;OAS1;PML;PSMB8;STAT1;STAT2;IFITM1;OASL;UBE2L6;ISG15;ADAR;IRF9;IFITM3;IFITM2;USP18;DDX58;IFI6;GBP1;HLA-A;HLA-B;HLA-C;HLA-F |

|                           |     |          |                                                               |          |          |                                                                                                               |
|---------------------------|-----|----------|---------------------------------------------------------------|----------|----------|---------------------------------------------------------------------------------------------------------------|
| IGFBP6_artery             | 45  | PID      | Integrin1 pathway                                             | 3.30E-04 | 2.50E-07 | TGFBI;THBS1;COL6A1;COL6A2;FBN1;FN1                                                                            |
| IGSF10_muscle             | 45  | NABA     | Extracellular Matrix                                          | 5.80E-09 | 7.70E-06 | IGSF10;COL1A2;FNDC1;COL3A1;COL6A3;WISP1;TNC;SPON2;COL5A2                                                      |
| IGSF10_muscle             | 45  | PID      | Integrin1 pathway                                             | 3.90E-07 | 5.10E-04 | COL1A2;COL3A1;COL6A3;TNC;COL5A2                                                                               |
| IGSF10_muscle             | 45  | NABA     | Core matrisome                                                | 7.70E-04 | 5.80E-09 | IGSF10;COL6A3;SPON2;TNC;WISP1;COL1A2;COL3A1;COL5A2;FNDC1                                                      |
| IL15RA_liver              | 20  | BIOCARTA | G1 pathway                                                    | 3.20E-04 | 4.20E-01 | SMAD3;CDKN1A                                                                                                  |
| IL15RA_liver              | 20  | PID      | Myc represspathway                                            | 1.60E-03 | 1.00E+00 | SMAD3;CDKN1A                                                                                                  |
| IRF1_artery               | 62  | REACTOME | Interferon alpha beta signaling                               | 5.90E-13 | 4.40E-16 | IRF1;ISG20;PSMB8;STAT1;IFITM1;OASL;ISG15;ADAR;IRF9;GBP2;IFI35;IFIT3                                           |
| IRF1_artery               | 62  | REACTOME | Interferon signaling                                          | 3.20E-12 | 2.40E-15 | IRF1;ISG20;PSMB8;STAT1;IFITM1;OASL;UBE2L6;CD44;ISG15;ADAR;IRF9;GBP2;ICAM1;IFI35;IFIT3                         |
| IRF7_adipose              | 24  | REACTOME | Interferon alpha beta signaling                               | 0.00E+00 | 0.00E+00 | IRF7;ISG15;MX1;OAS2;USP18;ADAR;IFIT1;OAS1;OASL;STAT2                                                          |
| IRF7_adipose              | 24  | REACTOME | Interferon signaling                                          | 0.00E+00 | 0.00E+00 | IRF7;GBP4;ISG15;MX1;OAS2;USP18;ADAR;IFIT1;OAS1;OASL;STAT2                                                     |
| IRF7_vascular_endothelium | 9   | REACTOME | Interferon alpha beta signaling                               | 3.80E-07 | 2.90E-10 | IRF7;STAT1;ISG15;IFI35;IFIT3                                                                                  |
| IRF9_smooth_muscle        | 37  | REACTOME | Interferon signaling                                          | 0.00E+00 | 0.00E+00 | IRF9;DDX58;GBP1;HLA-B;HLA-G;IFI27;IFI35;IFIT3;IRF1;ISG20;MX1;MX2;SLP100;STAT1;STAT2;IFITM1;UBE2L6;ISG15;ADAR  |
| ISG15_cardiac_muscle      | 59  | REACTOME | Interferon alpha beta signaling                               | 0.00E+00 | 0.00E+00 | ISG15;ADAR;IFITM3;IFITM2;HLA-A;HLA-B;HLA-C;HLA-F;HLA-G;IFI27;IFI35;MX1;STAT1;IFITM1                           |
| ISG15_cardiac_muscle      | 59  | REACTOME | Interferon signaling                                          | 0.00E+00 | 0.00E+00 | ISG15;ADAR;IFITM3;IFITM2;FLNB;GBP1;HLA-A;HLA-B;HLA-C;HLA-F;HLA-G;IFI27;IFI35;MX1;B2M;STAT1;UBA7;IFITM1;UBE2L6 |
| ITGA7_adipose             | 37  | KEGG     | ECM receptor interaction                                      | 3.40E-05 | 4.50E-02 | ITGA7;COL4A1;VTN;COL4A2                                                                                       |
| ITGA7_adipose             | 37  | NABA     | Basement membranes                                            | 9.50E-05 | 1.30E-01 | NID2;COL4A1;COL4A2                                                                                            |
| ITGA7_adipose             | 37  | KEGG     | ECM receptor interaction                                      | 4.50E-02 | 3.40E-05 | ITGA7;VTN;COL4A1;COL4A2                                                                                       |
| ITGB4_aorta               | 22  | REACTOME | Interferon signaling                                          | 3.60E-01 | 2.70E-04 | MX1;MX2;PML;HLA-B                                                                                             |
| JAG1_vascular_endothelium | 25  | PID      | Integrin1 pathway                                             | 1.70E-02 | 1.30E-05 | ITGA6;ITGAV;LAMB3;VEGFA                                                                                       |
| KCNK13_liver              | 45  | PID      | Tcr pathway                                                   | 1.30E-05 | 1.70E-02 | CD86;PLCG1;INPP5D;WAS                                                                                         |
| KCNK13_liver              | 45  | PID      | S1p s1p4 pathway                                              | 4.40E-04 | 5.90E-01 | PLCG1;S1PR5                                                                                                   |
| KL_brain                  | 42  | NABA     | Collagens                                                     | 4.90E-08 | 6.50E-05 | COL9A3;COL8A2;COL8A1;COL4A4;COL23A1                                                                           |
| KL_brain                  | 42  | NABA     | Extracellular Matrix                                          | 1.30E-07 | 1.70E-04 | COL9A3;COL8A2;LUM;COL8A1;COL4A4;COL23A1;FN1;IGFBP2                                                            |
| KL_brain                  | 42  | NABA     | Collagens                                                     | 6.50E-05 | 4.90E-08 | COL4A4;COL8A1;COL8A2;COL9A3;COL23A1                                                                           |
| KLF6_smooth_muscle        | 104 | PID      | AP1 pathway                                                   | 5.30E-07 | 4.00E-10 | DUSP1;EGR1;FOS;FOSL2;CYR61;JUN;MAFG;MYB;ATF3;TCF7L2                                                           |
| KLF6_smooth_muscle        | 104 | PID      | HIF1 tfpathway                                                | 6.50E-06 | 4.90E-09 | FOS;HMOX1;ID2;JUN;SMAD3;MCL1;VEGFA;BHLHE40;CIPTED2                                                            |
| KNG1_brain                | 56  | REACTOME | Lipoprotein metabolism                                        | 3.80E-10 | 5.10E-07 | ALB;APOA1;APOC2;APOA5;APOC3;APOB                                                                              |
| KNG1_brain                | 56  | REACTOME | Chylomicron mediated lipid transport                          | 1.60E-09 | 2.10E-06 | APOA1;APOC2;APOA5;APOC3;APOB                                                                                  |
| KNG1_brain                | 56  | REACTOME | Lipoprotein metabolism                                        | 5.10E-07 | 3.80E-10 | APOA1;APOA5;APOB;APOC2;APOC3;ALB                                                                              |
| KNG1_muscle               | 29  | REACTOME | Chylomicron mediated lipid transport                          | 1.10E-08 | 1.40E-05 | APOA1;APOA5;APOC3;APOB                                                                                        |
| KNG1_muscle               | 29  | KEGG     | Ppar signaling pathway                                        | 8.30E-08 | 1.10E-04 | APOA1;APOA5;APOC3;SLC27A2;ACOX2                                                                               |
| LAMA2_adipose             | 33  | PID      | Integrin1 pathway                                             | 5.30E-06 | 7.10E-03 | COL3A1;FN1;LAMA2;LAMC1                                                                                        |
| LAMA2_adipose             | 33  | KEGG     | ECM receptor interaction                                      | 1.40E-05 | 1.90E-02 | COL3A1;FN1;LAMA2;LAMC1                                                                                        |
| LAMA2_adipose             | 33  | PID      | Integrin1 pathway                                             | 7.10E-03 | 5.30E-06 | LAMA2;LAMC1;COL3A1;FN1                                                                                        |
| LARGE_liver               | 20  | PID      | Txa2pathway                                                   | 1.60E-03 | 1.00E+00 | VCAM1;PRKCA                                                                                                   |
| LARGE_liver               | 20  | PID      | Integrin1 pathway                                             | 2.20E-03 | 1.00E+00 | COL6A3;VCAM1                                                                                                  |
| LDLR_PPI                  | 11  | REACTOME | Chylomicron mediated lipid transport                          | 7.60E-10 | 1.00E-06 | LDLR;APOE;LDLRAP1;APOB                                                                                        |
| LDLR_PPI                  | 11  | REACTOME | Lipoprotein metabolism                                        | 8.50E-09 | 1.10E-05 | LDLR;APOE;LDLRAP1;APOB                                                                                        |
| LOXL1_muscle              | 30  | REACTOME | Collagen formation                                            | 8.30E-10 | 1.10E-06 | COL5A1;COL6A3;COL4A2;COL6A2;SERPINH1;PCOLCE                                                                   |
| LOXL1_muscle              | 30  | REACTOME | Extracellular Matrix                                          | 1.00E-08 | 1.30E-05 | COL5A1;COL6A3;COL4A2;COL6A2;SERPINH1;PCOLCE                                                                   |
| LOXL2_liver               | 28  | REACTOME | Collagen formation                                            | 8.30E-10 | 1.10E-06 | COL1A2;COL3A1;COL4A1;COL4A2;COL1A1;SERPINH1                                                                   |
| LOXL2_liver               | 28  | REACTOME | Ncam1 interactions                                            | 8.60E-09 | 1.10E-05 | COL1A2;COL3A1;COL4A1;COL4A2;COL1A1                                                                            |
| LUM_brain                 | 45  | NABA     | Extracellular Matrix                                          | 1.90E-10 | 2.50E-07 | DCN;COL3A1;LUM;COL13A1;COL8A1;SPOCK3;EFEMP1;OGN;PCOLCE;TGFB1;SMOC2                                            |
| LUM_brain                 | 45  | NABA     | Proteoglycans                                                 | 3.30E-06 | 4.40E-03 | DCN;LUM;SPOCK3;OGN                                                                                            |
| LY96_vascular_endothelium | 15  | REACTOME | Interferon signaling                                          | 5.00E-02 | 3.80E-05 | HLA-G;IFITM1;UBE2L6;IFITM2                                                                                    |
| MAFF_liver                | 27  | PID      | P53downstreampathway                                          | 2.20E-07 | 3.00E-04 | SERPINE1;EPHA2;MCL1;GDF15;DUSP5;ATF3                                                                          |
| MAFF_liver                | 27  | PID      | Aif2 pathway                                                  | 2.20E-04 | 3.00E-01 | DUSP5;ATF3;IL8                                                                                                |
| MATN2_PPI                 | 13  | NABA     | Extracellular Matrix                                          | <1.0E-16 | <1.0E-16 | COL4A6;COL4A1;MATN4;COL1A1;COL4A2;COL4A3;MATN2;MATN1;COL4A5;FBN2;COL4A4;FN1                                   |
| MATN2_PPI                 | 13  | BIOCARTA | Vitcb pathway                                                 | 4.40E-16 | 5.90E-13 | COL4A6;COL4A1;COL4A2;COL4A3;COL4A5;COL4A4                                                                     |
| MMP9_PPI                  | 31  | REACTOME | Extracellular Matrix                                          | <1.0E-16 | <1.0E-16 | COL4A6;PLG;COL1A2;PRSS2;COL4A1;COL4A2;COL1A1;COL4A3;MMP7;COL4A5;COL4A4;MMP10;MMP9                             |
| MMP9_PPI                  | 31  | BIOCARTA | Ami pathway                                                   | 4.40E-16 | 5.90E-13 | COL4A6;PLG;COL4A1;COL4A2;COL4A3;COL4A5;COL4A4;TFPI                                                            |
| MMT00002956_liver         | 36  | REACTOME | Response to elevated platelet cytosolic ca2                   | 4.40E-04 | 5.90E-01 | TGFB3;SRGN;PLEK                                                                                               |
| MMT00002956_liver         | 36  | BIOCARTA | Dc pathway                                                    | 6.40E-04 | 8.50E-01 | CD2;ITGAX                                                                                                     |
| MMT00019644_adipose       | 37  | REACTOME | Pyrimidine metabolism                                         | 7.60E-04 | 1.00E+00 | TK1;UCK1                                                                                                      |
| MMT00019644_adipose       | 37  | PID      | Vegfr1 pathway                                                | 9.00E-04 | 1.00E+00 | VEGFA;PRKCA                                                                                                   |
| MMT00081256_muscle        | 20  | REACTOME | Interferon gamma signaling                                    | 1.70E-05 | 2.20E-02 | GBP1;GBP4;STAT1                                                                                               |
| MMT00081256_muscle        | 20  | REACTOME | Interferon signaling                                          | 2.60E-04 | 3.50E-01 | GBP1;GBP4;STAT1                                                                                               |
| MSN_liver                 | 56  | KEGG     | Fc gamma r mediated phagocytosis                              | 1.90E-05 | 2.50E-02 | PIK3CG;LIMK2;MARCKSL1;INPP5D;PTPRC                                                                            |
| MSN_liver                 | 56  | PID      | Cxcr4 pathway                                                 | 4.00E-04 | 5.30E-01 | ADRBK1;PIK3CG;INPP5D;PTPRC                                                                                    |
| MSN_vascular_endothelium  | 105 | KEGG     | Focal adhesion                                                | 7.40E-10 | 5.50E-13 | MYLK;RAC2;SHC1;THBS1;ZYX;CAV2;ACTN1;MYL9;COL4A1;COL4A2;COL5A2;FLNA;FN1;FYN;BIRC3;ILK;ITGA5;LAMA4              |
| MSN_vascular_endothelium  | 105 | PID      | Integrin1 pathway                                             | 3.80E-08 | 2.80E-11 | NID1;PLAU;PLAUR;TGFB1;THBS1;COL4A1;COL5A2;FBN1;FN1;ITGA5;LAMA4                                                |
| MTMR11_liver              | 80  | PID      | Avb3 integrin pathway                                         | 5.50E-04 | 7.40E-01 | VCL;COL3A1;COL4A1;TGFB2                                                                                       |
| MTMR11_liver              | 80  | PID      | Integrin3 pathway                                             | 1.30E-03 | 1.00E+00 | COL4A1;PDGFRB;TGFB2                                                                                           |
| MTMR11_liver              | 80  | PID      | AVB3 integrin pathway                                         | 7.40E-01 | 5.50E-04 | COL4A1;TGFB2;VCL;COL3A1                                                                                       |
| NCOR2_kidney              | 12  | REACTOME | Transcriptional regulation of white adipocyte differentiation | 8.80E-04 | 1.00E+00 | NCOR2;MED13L                                                                                                  |
| NCOR2_kidney              | 12  | REACTOME | Fatty acid triacylglycerol and ketone body metabolism         | 4.70E-03 | 1.00E+00 | NCOR2;MED13L                                                                                                  |
| NGRN_liver                | 32  | REACTOME | Transcriptional regulation of white adipocyte differentiation | 8.80E-04 | 1.00E+00 | NCOR2;MED13L                                                                                                  |
| NGRN_liver                | 32  | REACTOME | Fatty acid triacylglycerol and ketone body metabolism         | 4.70E-03 | 1.00E+00 | NCOR2;MED13L                                                                                                  |
| NM_009245_brain           | 26  | REACTOME | Common pathway                                                | 2.40E-09 | 3.10E-06 | SERPINC1;F13B;F2;FGB                                                                                          |
| NM_009245_brain           | 26  | KEGG     | Complement and coagulation cascades                           | 2.50E-08 | 3.30E-05 | SERPINC1;F13B;F2;CFI;FGB                                                                                      |

|                            |     |          |                                             |          |          |                                                                                                                                                                                                 |
|----------------------------|-----|----------|---------------------------------------------|----------|----------|-------------------------------------------------------------------------------------------------------------------------------------------------------------------------------------------------|
| NME6_kidney                | 10  | REACTOME | Common pathway                              | 2.40E-09 | 3.10E-06 | SERPINC1;F13B;F2;FGB                                                                                                                                                                            |
| NME6_kidney                | 10  | KEGG     | Complement and coagulation cascades         | 2.50E-08 | 3.30E-05 | SERPINC1;F13B;F2;CFI;FGB                                                                                                                                                                        |
| NOTCH1_PPI                 | 46  | KEGG     | Notch signaling pathway                     | <1.0E-16 | <1.0E-16 | JAG2;MAML3;LFNG;NOTCH1;JAG1;MFNG;MAML2;DLL1;DTX1;EP300;DTX2;PSEN1;SNW1;KAT2B;DLL4;NUMB;MAML1;PSEN2;RBPJ;NUMBL;KAT2A;ADAM17                                                                      |
| NOTCH1_PPI                 | 46  | PID      | Notch pathway                               | <1.0E-16 | <1.0E-16 | YY1;JAG2;NOTCH1;JAG1;CNTN1;MAML2;DLL1;DTX1;EP300;PSEN1;DLL4;FURIN;NUMB;MAML1;CBL;FBXW7;RBPJ;ITCH                                                                                                |
| OAS2_kidney                | 12  | REACTOME | Interferon signaling                        | 1.70E-03 | 1.30E-06 | OAS2;IRF7;IFIT1;OAS1                                                                                                                                                                            |
| OSM_PPI                    | 10  | BIOCARTA | Vitcb pathway                               | 1.10E-16 | 1.50E-13 | COL4A6;COL4A1;COL4A2;COL4A3;COL4A5;COL4A4                                                                                                                                                       |
| OSM_PPI                    | 10  | BIOCARTA | Ace2 pathway                                | 4.40E-16 | 5.90E-13 | COL4A6;COL4A1;COL4A2;COL4A3;COL4A5;COL4A4                                                                                                                                                       |
| PAPSS2_cardiac_muscle      | 81  | NABA     | ECM glycoproteins                           | 8.00E-05 | 6.00E-08 | GAS6;EFEMP2;IGFBP7;CYR61;LAMB1;LAMB3;LAMC1;LTBP1;TGFB1;THBS1;SRPX                                                                                                                               |
| PAPSS2_cardiac_muscle      | 81  | NABA     | Core matrisome                              | 3.00E-04 | 2.20E-07 | COL4A1;GAS6;EFEMP2;IGFBP7;CYR61;LAMB1;LAMB3;LAMC1;LTBP1;TGFB1;THBS1;SRPX                                                                                                                        |
| PAPSS2_smooth_muscle       | 14  | KEGG     | Pathways in cancer                          | 1.30E-01 | 9.80E-05 | COL4A1;FGFR3;AR;VEGFA                                                                                                                                                                           |
| PAPSS2_smooth_muscle       | 14  | KEGG     | Bladder cancer                              | 7.40E-01 | 5.60E-04 | FGFR3;VEGFA                                                                                                                                                                                     |
| PLG_adipose                | 46  | KEGG     | Complement and coagulation cascades         | 2.50E-11 | 3.30E-08 | FGA;FGG;PLG;SERPINC1;C9;MBL2;F13B;F2                                                                                                                                                            |
| PLG_adipose                | 46  | REACTOME | Common pathway                              | 4.20E-10 | 5.60E-07 | FGA;FGG;SERPINC1;F13B;F2                                                                                                                                                                        |
| PLG_liver                  | 43  | NABA     | ECM regulators                              | 2.90E-07 | 2.20E-10 | PLG;F2;HRG;ITIH2;KNG1;PZP;SERPINA11;SERPINC1;SERPINF2;ITIH3                                                                                                                                     |
| PTCHD1_adipose             | 104 | BIOCARTA | Ccr5 pathway                                | 1.80E-04 | 2.40E-01 | FOS;CCR5;CCL4                                                                                                                                                                                   |
| PTCHD1_adipose             | 104 | BIOCARTA | Igf1 pathway                                | 2.10E-04 | 2.80E-01 | FOS;PIK3CG;RAS1                                                                                                                                                                                 |
| PTCHD1_adipose             | 104 | BIOCARTA | CCR5 pathway                                | 2.40E-01 | 1.80E-04 | CCL4;CCR5;FOS                                                                                                                                                                                   |
| PTPN11_PPI                 | 109 | KEGG     | Focal adhesion                              | 0.00E+00 | 0.00E+00 | MAPK3;PDGFRB;SHC1;ACTN4;CRKL;PDGFR;PRKCB;CAV1;GRB2;PIK3CG;KDR;PXN;SRC;IGF1R;PTK2;SOS1;EGFR;FLT1;FLT4;FYN;MET;ERBB2;PIK3R1;PRKCA                                                                 |
| RAC2_cardiac_muscle        | 58  | REACTOME | Interferon gamma signaling                  | 6.00E-10 | 4.50E-13 | STAT1;CD44;GBP1;HLA-A;HLA-B;HLA-DPA1;HLA-G;ICAM1;OAS2;B2M                                                                                                                                       |
| RAC2_cardiac_muscle        | 58  | REACTOME | Interferon signaling                        | 1.90E-08 | 1.40E-11 | STAT1;CD44;GBP1;HLA-A;HLA-B;HLA-DPA1;HLA-G;ICAM1;IFIT3;OAS2;B2M;PSMB8                                                                                                                           |
| RDH16_brain                | 43  | KEGG     | Complement and coagulation cascades         | 7.00E-09 | 9.30E-06 | CFI;C8A;F10;KNG1;C9;KLKB1                                                                                                                                                                       |
| RDH16_brain                | 43  | REACTOME | Complement cascade                          | 6.90E-07 | 9.10E-04 | CRP;CFI;C8A;C9                                                                                                                                                                                  |
| RDH16_brain                | 43  | KEGG     | Complement and coagulation cascades         | 9.30E-06 | 7.00E-09 | C8A;CFI;F10;KLKB1;C9;KNG1                                                                                                                                                                       |
| RDH16_muscle               | 36  | KEGG     | Complement and coagulation cascades         | 3.80E-07 | 5.00E-04 | PLG;SERPINC1;C8G;F2;KNG1                                                                                                                                                                        |
| RDH16_muscle               | 36  | BIOCARTA | Ami pathway                                 | 1.10E-05 | 1.50E-02 | PLG;SERPINC1;F2                                                                                                                                                                                 |
| SCARA3_muscle              | 30  | PID      | Avb3 integrin pathway                       | 1.40E-05 | 1.90E-02 | TGFB2;COL14A1;FN1;CSF1R                                                                                                                                                                         |
| SCARA3_muscle              | 30  | NABA     | Matrisome associated                        | 5.00E-04 | 6.60E-01 | MMP2;GDF10;SFRP2;GPC6;TIMP2;CD109;SERPINF1                                                                                                                                                      |
| SDCBP_aorta                | 155 | NABA     | Core matrisome                              | 3.70E-11 | 2.80E-14 | THBS2;PXDN;SPARCL1;SRPX;FBLN5;POSTN;COL1A2;COL15A1;COL16A1;EPYC;FGG;NID2;MXRA5;TNC;IGFBP3;CYR61;LAMA3;LAMA4;LAMB1;LTBP2;LUM;MFAP4;OMD;PRLP                                                      |
| SDCBP_aorta                | 155 | NABA     | ECM glycoproteins                           | 3.50E-07 | 2.60E-10 | THBS2;PXDN;SPARCL1;SRPX;FBLN5;POSTN;FGG;NID2;MXRA5;TNC;IGFBP3;CYR61;LAMA3;LAMA4;LAMB1;LTBP2;MFAP4                                                                                               |
| SERPINC1_adipose           | 34  | REACTOME | Common pathway                              | 2.30E-10 | 3.10E-07 | FGG;SERPINC1;F13B;F2;FGB                                                                                                                                                                        |
| SERPINC1_adipose           | 34  | KEGG     | Complement and coagulation cascades         | 5.70E-10 | 7.50E-07 | FGG;C4BPA;PLG;SERPINC1;F13B;F2;FGB                                                                                                                                                              |
| SERPINC1_adipose           | 34  | REACTOME | Common pathway                              | 3.10E-07 | 2.30E-10 | SERPINC1;F13B;F2;FGG;FGB                                                                                                                                                                        |
| SHC1_PPI                   | 118 | KEGG     | ErbB signaling pathway                      | <1.0E-16 | <1.0E-16 | SHC1;ERBB4;PTK2;PIK3R1;MAPK1;SOS1;PRKCA;PAK1;CBL;STAT5B;STAT5A;SOS2;PLCG1;MAPK8;EGFR;CBL;SRC;PIK3R2;CRK;PLCG2;GAB1;ERBB3;CRKL;ERBB2;GRB2                                                        |
| SHC1_PPI                   | 118 | KEGG     | Focal adhesion                              | <1.0E-16 | <1.0E-16 | FLT4;SHC1;PTK2;PIK3R1;VAV3;MAPK1;SOS1;KDR;PRKCA;PAK1;PDGFRB;FLT1;VAV1;RAPGEF1;SOS2;MAPK8;EGFR;ITGB4;SRC;ITGB3;FYN;MET;PIK3R2;CRK;CRKL;ERBB2;GRB2                                                |
| SHC1_PPI                   | 118 | KEGG     | ERBB signaling pathway                      | 0.00E+00 | 0.00E+00 | SHC1;PAK1;SOS1;ERBB3;GRB2;SOS2;CBL;CRKL;PLCG1;ERBB2;MAPK8;SRC;STAT5B;CBL;CRK;ERBB4;STAT5A;EGFR;GAB1;PIK3R2;PTK2;MAPK1;PIK3R1;PLCG2;PRKCA                                                        |
| SLC1A5_muscle              | 40  | KEGG     | Focal adhesion                              | 0.00E+00 | 0.00E+00 | SHC1;PAK1;SOS1;GRB2;SOS2;CRKL;FLT1;PDGFRB;ERBB2;KDR;MAPK8;RAPGEF1;SRC;ITGB3;MET;CRK;ITGB4;VAV1;VAV3;EGFR;FLT4;FYN;PIK3R2;PTK2;MAPK1;PIK3R1;PRKCA                                                |
| SLC2A3_aorta               | 190 | NABA     | Core matrisome                              | 5.20E-03 | 3.90E-06 | SPOCK1;TNFAIP6;PXDN;COL18A1;POSTN;COL4A1;COL4A2;AEBP1;FMOD;IGFBP1;IGFBP3;IGFBP6;CYR61;LAMB1;LTBP2;NID1                                                                                          |
| SLC2A3_aorta               | 190 | PID      | P53 downstream pathway                      | 9.20E-03 | 6.90E-06 | SNAI2;TAP1;COL18A1;MAP4K4;DUSP5;EDN2;IGFBP3;JUN;MCL1;PML;S100A2                                                                                                                                 |
| SLIT2_aorta                | 170 | REACTOME | Cytokine signaling in immune system         | 1.80E-02 | 1.40E-05 | MAP3K8;GBP2;GHR;HLA-B;HLA-F;IFIT2;IFNGR1;IL1B;IL6;SP100;VCAM1;IFITM1;IRS2                                                                                                                       |
| SLIT2_aorta                | 170 | REACTOME | Interferon gamma signaling                  | 1.10E-01 | 8.40E-05 | GBP2;HLA-B;HLA-F;IFNGR1;SP100;VCAM1                                                                                                                                                             |
| SLIT3_muscle               | 28  | NABA     | ECM glycoproteins                           | 2.90E-10 | 3.90E-07 | SLIT3;THBS3;FNDC1;EMILIN2;NID1;SVEP1;FN1;EFEMP1;THBS2                                                                                                                                           |
| SLIT3_muscle               | 28  | NABA     | Extracellular Matrix                        | 5.80E-09 | 7.70E-06 | SLIT3;THBS3;FNDC1;EMILIN2;NID1;SVEP1;FN1;EFEMP1;THBS2                                                                                                                                           |
| SMAD1_PPI                  | 111 | KEGG     | Tgf beta signaling pathway                  | 2.70E-14 | 3.60E-11 | SMAD1;BMPR1A;MAPK1;EP300;SMAD3;SMAD4;SMAD6;SMAD5;GDF6;TGFB1;ACVR1;SMURF2;SMURF1                                                                                                                 |
| SMAD1_PPI                  | 111 | REACTOME | Tgf beta receptor signaling activates smads | 9.20E-14 | 1.20E-10 | XPO1;STUB1;SMAD3;SMAD4;UBA52;TGFB1;SMURF2;RPS27A;SMURF1                                                                                                                                         |
| SMAD1_PPI                  | 111 | KEGG     | TGF beta signaling pathway                  | 3.60E-11 | 2.70E-14 | SMAD1;MAPK1;GDF6;SMAD5;SMAD6;SMURF1;TGFB1;BMPR1A;EP300;SMAD4;SMURF2;ACVR1;SMAD3                                                                                                                 |
| SORL1_vascular_endothelium | 14  | KEGG     | TGF beta signaling pathway                  | 3.60E-11 | 2.70E-14 | SMAD1;MAPK1;GDF6;SMAD5;SMAD6;SMURF1;TGFB1;BMPR1A;EP300;SMAD4;SMURF2;ACVR1;SMAD3                                                                                                                 |
| SORL1_vascular_endothelium | 14  | REACTOME | TGF beta receptor signaling activates smads | 1.20E-10 | 9.20E-14 | XPO1;STUB1;UBA52;SMURF1;TGFB1;RPS27A;SMAD4;SMURF2;SMAD3                                                                                                                                         |
| SPARC_muscle               | 34  | NABA     | Extracellular Matrix                        | 4.00E-13 | 5.30E-10 | SPARC;COL5A1;COL1A2;COL3A1;COL4A1;COL4A2;COL1A1;MATN2;NID1;FN1;COL5A2;SRPX2                                                                                                                     |
| SPARC_muscle               | 34  | REACTOME | Collagen formation                          | 6.80E-13 | 9.00E-10 | COL5A1;COL1A2;COL3A1;COL4A1;COL4A2;COL1A1;SERPINH1;COL5A2                                                                                                                                       |
| STAT3_PPI                  | 102 | KEGG     | Jak stat signaling pathway                  | <1.0E-16 | <1.0E-16 | IL6ST;IL7R;LEPR;IL2RB;JAK2;IL6R;STAT3;TSLP;IFNAR2;STAT5B;STAT1;EP300;PTPN11;IFNAR1;STAT5A;CSF2RB;GHR;CREBBP;STAT4;CCND1;IL2RA;PIAS3;JAK3;JAK1;CSF3R                                             |
| STAT3_PPI                  | 102 | KEGG     | Pathways in cancer                          | <1.0E-16 | <1.0E-16 | HSP90AB1;FGFR3;MTOR;PDGFR;STAT3;MAPK1;RELA;HIF1A;RAC1;STAT5B;STAT1;PDGFR;EP300;RET;HDAC1;STAT5A;MAPK8;EGFR;NFKB1;PML;IGF1R;MET;CREBBP;JUN;CDKN1A;HSP90AA1;CCND1;MAPK3;PIAS3;JAK1;AR;CSF3R;HDAC2 |
| TGFB1_PPI                  | 10  | PID      | Integrin1 pathway                           | 2.20E-16 | 3.00E-13 | COL1A2;COL4A1;COL1A1;COL4A3;COL2A1;COL4A4;FN1                                                                                                                                                   |

|                             |    |          |                                           |          |          | TGFB1                                                      |
|-----------------------------|----|----------|-------------------------------------------|----------|----------|------------------------------------------------------------|
| TGFB1_PPI                   | 10 | REACTOME | Integrin cell surface interactions        | 8.90E-16 | 1.20E-12 | COL1A2;COL4A1;COL4A2;COL1A1;COL4A3;COL2A1;COL4A4;FN1       |
| TNFAIP2_cardiac_muscle      | 95 | REACTOME | Interferon signaling                      | 4.80E-03 | 3.60E-06 | CD44;IFITM3;HLA-A;HLA-B;HLA-F;ICAM1;IRF1;PML;STAT1         |
| TRAPPC3_brain               | 40 | KEGG     | Proximal tubule bicarbonate reclamation   | 1.50E-03 | 1.00E+00 | ATP1A2;ATP1A1                                              |
| TRAPPC3_brain               | 40 | REACTOME | Ion transport by p type atpases           | 3.20E-03 | 1.00E+00 | ATP1A2;ATP1A1                                              |
| TRAPPC3_brain               | 40 | KEGG     | Proximal tubule bicarbonate reclamation   | 1.00E+00 | 1.50E-03 | ATP1A1;ATP1A2                                              |
| TRIM22_vascular_endothelium | 27 | REACTOME | Interferon alpha beta signaling           | 3.00E-13 | 2.20E-16 | IRF9;IFITM3;HLA-B;IFI35;IFIT1;IFIT3;MX1;STAT1;IFITM1;ISG15 |
| TRIM8_smooth_muscle         | 7  | PID      | ATF2 pathway                              | 5.30E-01 | 4.00E-04 | DUSP5;PLAU                                                 |
| TRIM8_smooth_muscle         | 7  | REACTOME | Interferon signaling                      | 1.00E+00 | 2.90E-03 | UBE2L6;HLA-C                                               |
| VEGFA_adipose               | 36 | PID      | Ii5 pathway                               | 2.90E-04 | 3.80E-01 | CISH;STAT5B                                                |
| VEGFA_adipose               | 36 | KEGG     | Pantothenate and coa biosynthesis         | 3.80E-04 | 5.00E-01 | ENPP1;VNN1                                                 |
| VPS33A_adipose              | 21 | PID      | VEGFR1 2 pathway                          | 1.00E+00 | 1.50E-03 | PTPN11;CAMKK2                                              |
| WIPF1_liver                 | 20 | PID      | Cdc42 reg pathway                         | 5.50E-04 | 7.40E-01 | DOCK10;DOCK11                                              |
| WIPF1_liver                 | 20 | PID      | Fcer1 pathway                             | 2.40E-03 | 1.00E+00 | WIPF1;INPP5D                                               |
| WWC2_aorta                  | 30 | REACTOME | Cell cell junction organization           | 3.00E-01 | 2.20E-04 | CDH5;CDH11;CDH13                                           |
| ZNF496_liver                | 39 | REACTOME | Organic cation anion zwitterion transport | 2.20E-04 | 2.90E-01 | SLC22A4;SLC22A5                                            |
| ZNF496_liver                | 39 | REACTOME | Metabolism of non coding rna              | 3.20E-03 | 1.00E+00 | GEMIN5;SMN2                                                |
| ZYX_smooth_muscle           | 54 | KEGG     | Focal adhesion                            | 4.00E-02 | 3.00E-05 | ZYX;ACTN1;FLNA;ILK;ITGA5;LAMC1;VASP                        |

Note: Fisher's exact test was performed for the enrichment of the KD subnetworks in MSigDB canonical pathway database. Only the top two functional terms are shown based on the p values with bonferroni corrections.

## Supplementary Table VI. Data resources and references for tissue-specific Bayesian networks.

| Tissue               | Species | Dataset descriptions                                                                                                                                                           | References |
|----------------------|---------|--------------------------------------------------------------------------------------------------------------------------------------------------------------------------------|------------|
| Adipose tissue       | Human   | 1,675 individuals from two Icelandic cohorts                                                                                                                                   | (5)        |
|                      | Mouse   | C57BL/6J x A/J mouse cross                                                                                                                                                     | (6)        |
|                      | Mouse   | C57BL/6J x C3H ApoE -/- mouse cross                                                                                                                                            | (7, 8)     |
|                      | Mouse   | C57BL/6J x C3H wildtype mouse cross                                                                                                                                            | (9)        |
|                      | Mouse   | C57BL/6J x BTBR Lepob mouse cross                                                                                                                                              | (10)       |
| Blood                | Human   | 1,675 individuals from two Icelandic cohorts                                                                                                                                   | (5)        |
| Brain                | Mouse   | C57BL/6J x A/J mouse cross                                                                                                                                                     | (6)        |
|                      | Mouse   | C57BL/6J x C3H ApoE -/- mouse cross                                                                                                                                            | (7, 8)     |
|                      | Mouse   | C57BL/6J x BTBR Lepob mouse cross                                                                                                                                              | (10)       |
| Heart                | Mouse   | C57BL/6J x A/J mouse cross                                                                                                                                                     | (6)        |
| Islet cells          | Mouse   | C57BL/6J x BTBR Lepob mouse cross                                                                                                                                              | (10)       |
| Kidney               | Mouse   | C57BL/6J x A/J mouse cross                                                                                                                                                     | (6)        |
| Liver                | Human   | 427 individuals                                                                                                                                                                | (9)        |
|                      | Mouse   | C57BL/6J x A/J mouse cross                                                                                                                                                     | (6)        |
|                      | Mouse   | C57BL/6J x C3H ApoE -/- mouse cross                                                                                                                                            | (7, 8)     |
|                      | Mouse   | C57BL/6J x C3H wildtype mouse cross                                                                                                                                            | (9)        |
|                      | Mouse   | C57BL/6J x BTBR Lepob mouse cross                                                                                                                                              | (10)       |
| Muscle               | Mouse   | C57BL/6J x A/J mouse cross                                                                                                                                                     | (6)        |
|                      | Mouse   | C57BL/6J x C3H ApoE -/- mouse cross                                                                                                                                            | (7, 8)     |
|                      | Mouse   | C57BL/6J x C3H wildtype mouse cross                                                                                                                                            | (9)        |
|                      | Mouse   | C57BL/6J x BTBR Lepob mouse cross                                                                                                                                              | (10)       |
| Cardiac Muscle       | Human   | GIANT tissue networks integrate 987 genome-scale datasets, encompassing ~38,000 conditions from ~14,000 publications and include both expression and interaction measurements. | (11)       |
| Aorta                | Human   |                                                                                                                                                                                |            |
| Artery               | Human   |                                                                                                                                                                                |            |
| Smooth Muscle        | Human   |                                                                                                                                                                                |            |
| Vascular Endothelium | Human   |                                                                                                                                                                                |            |
